# Supplementary material for: Evaluation of Protein Dihedral Angle Prediction Methods
Source: PubMed Central journal article supplement (PMC4148315; doi:10.1371/journal.pone.0105667), 2014-08-28

---

# Phi Angle Distribution

---

*X-axis shows angle distribution*

*Y-axis shows the number of residues*

# Alanine

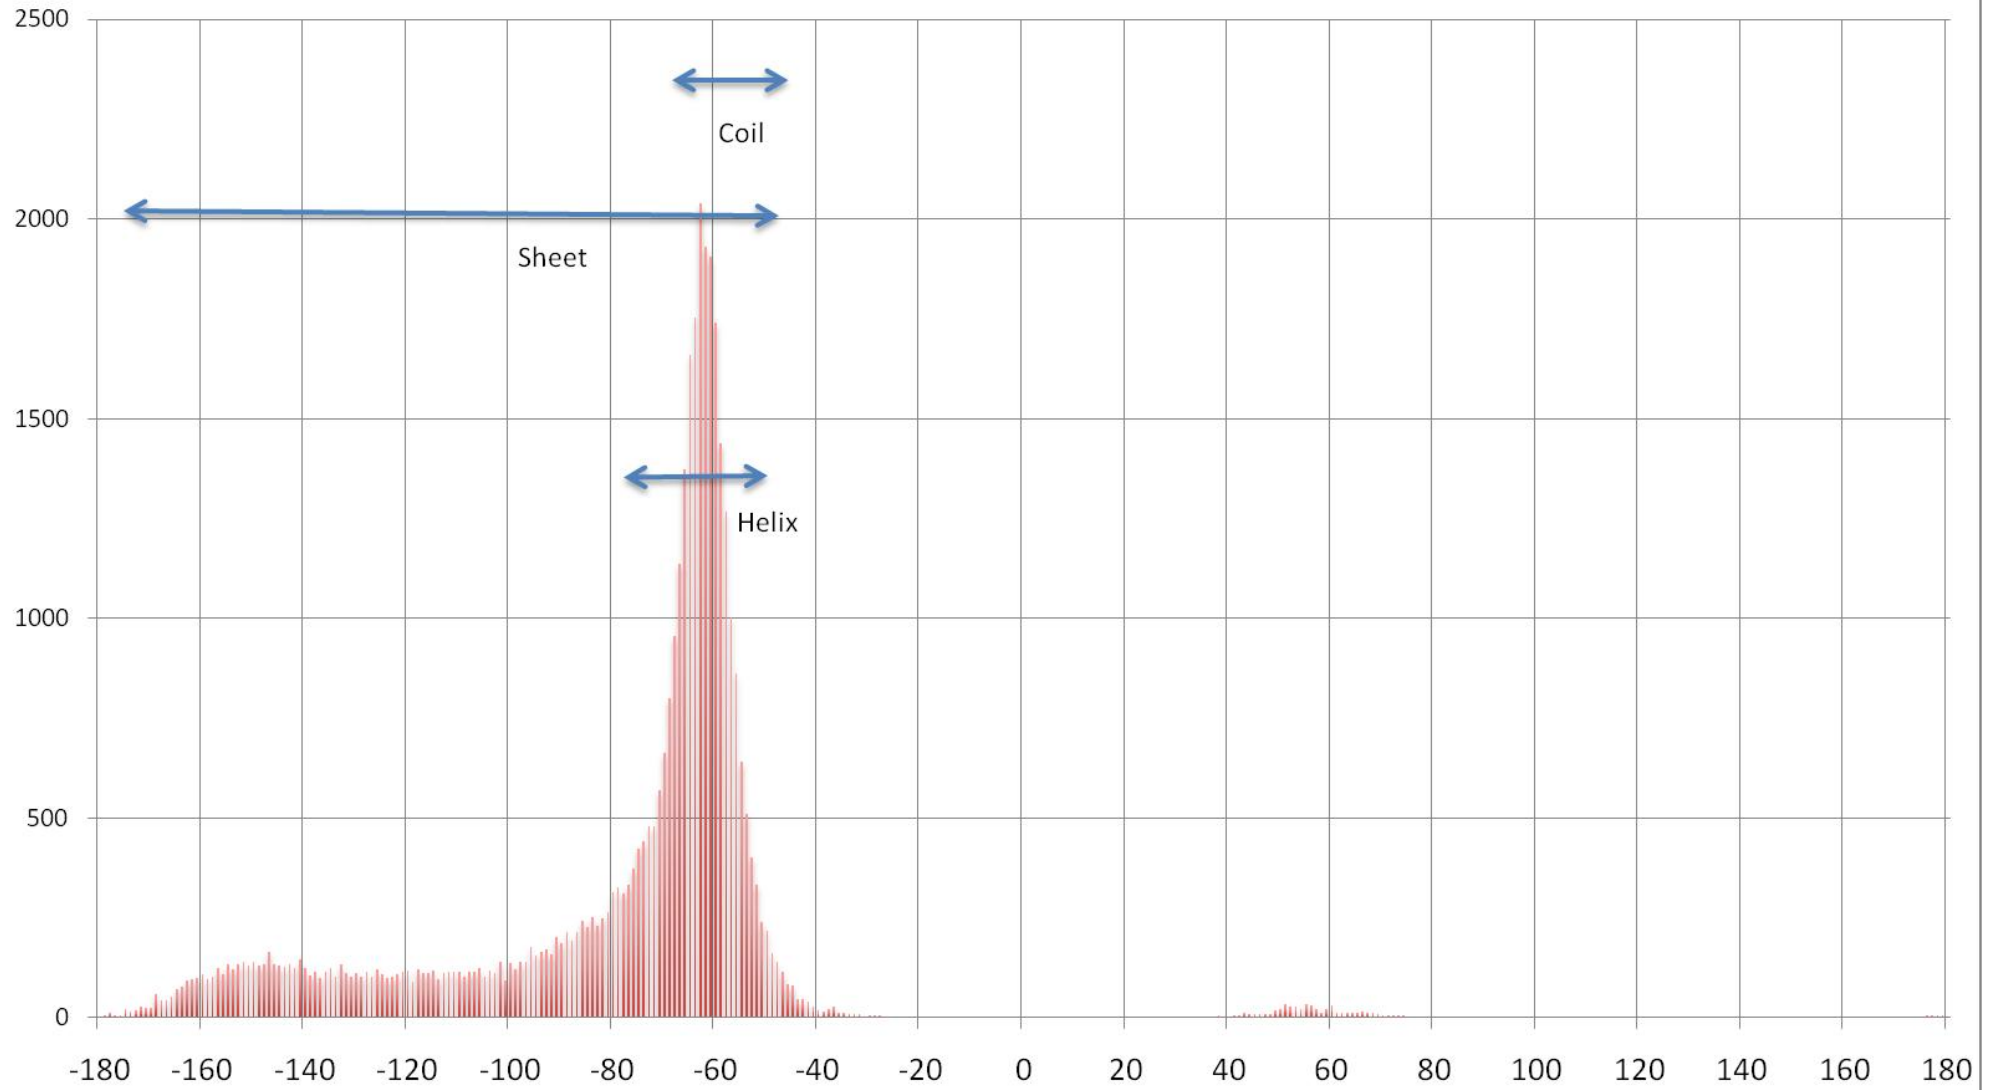

# Cysteine

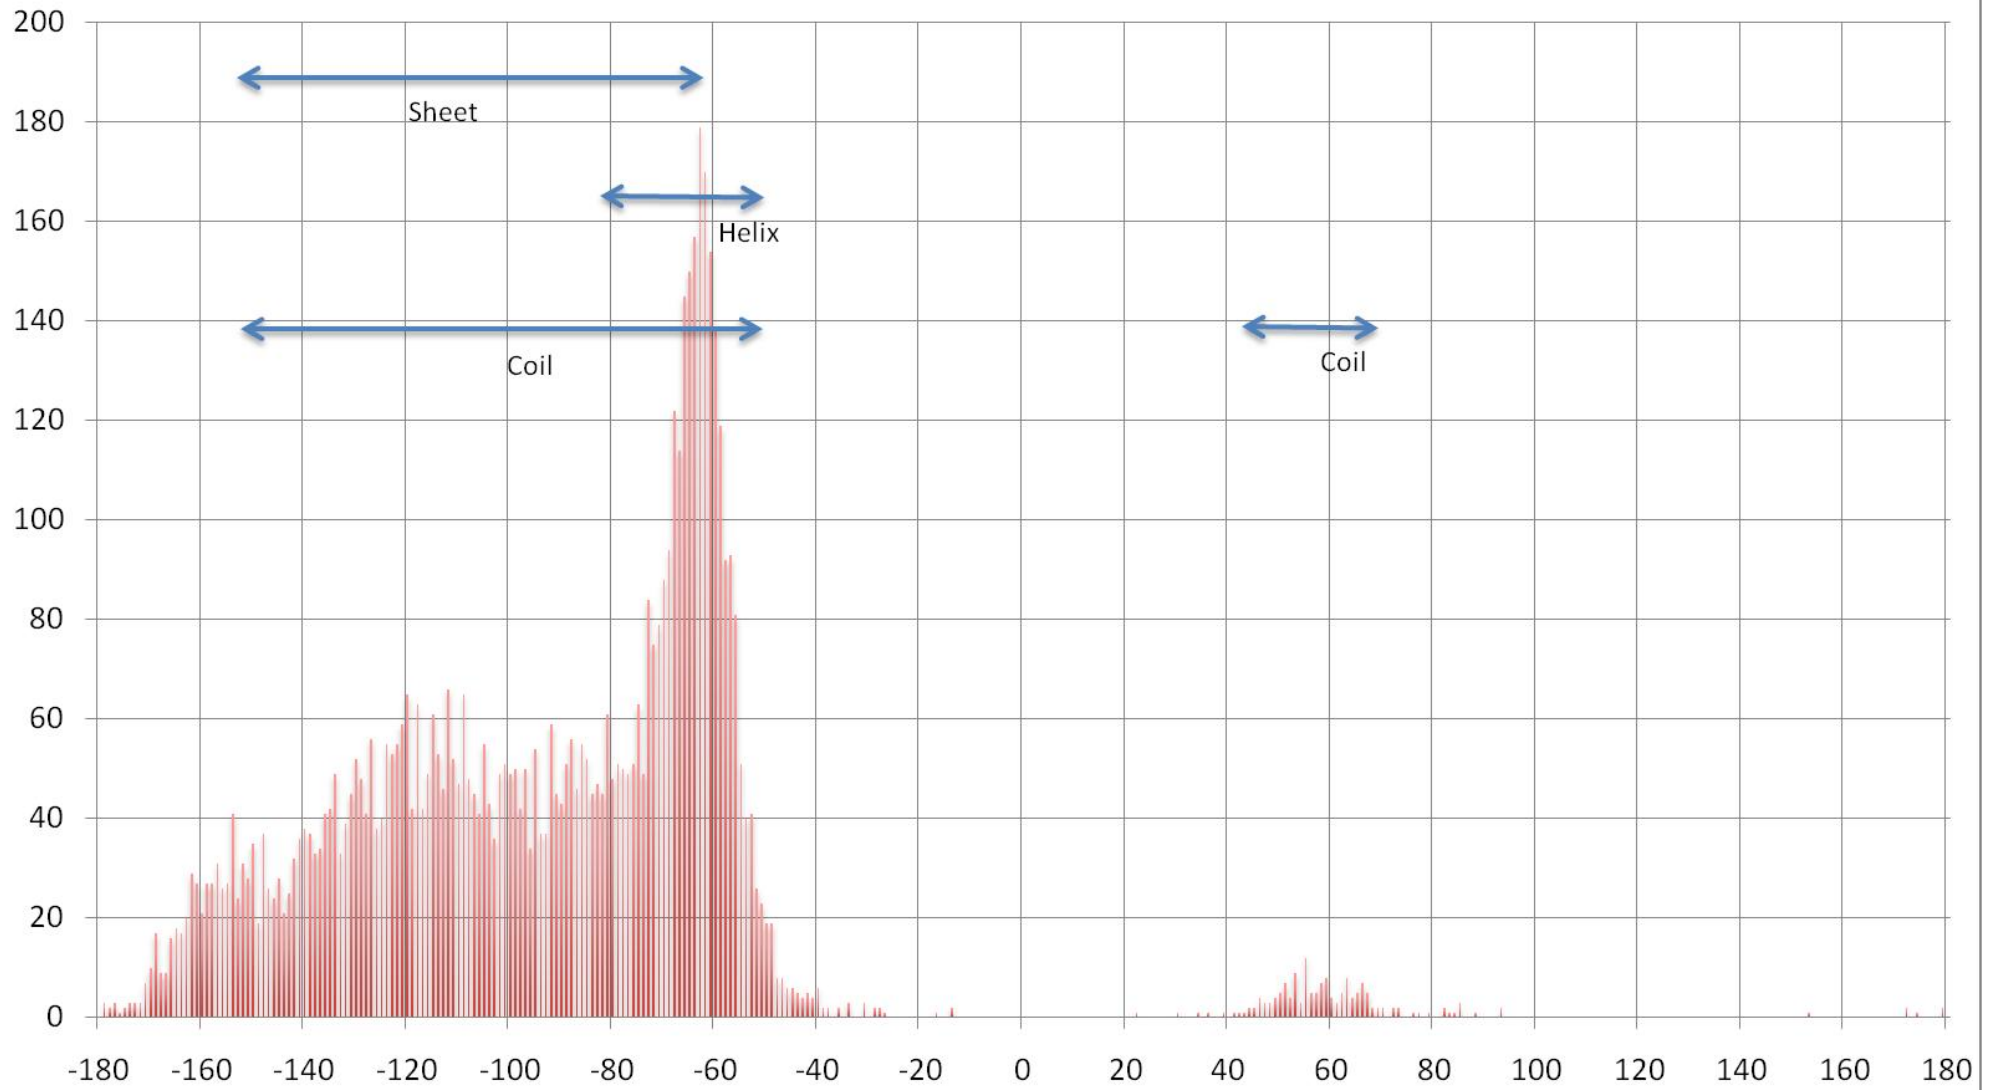

# Aspartate

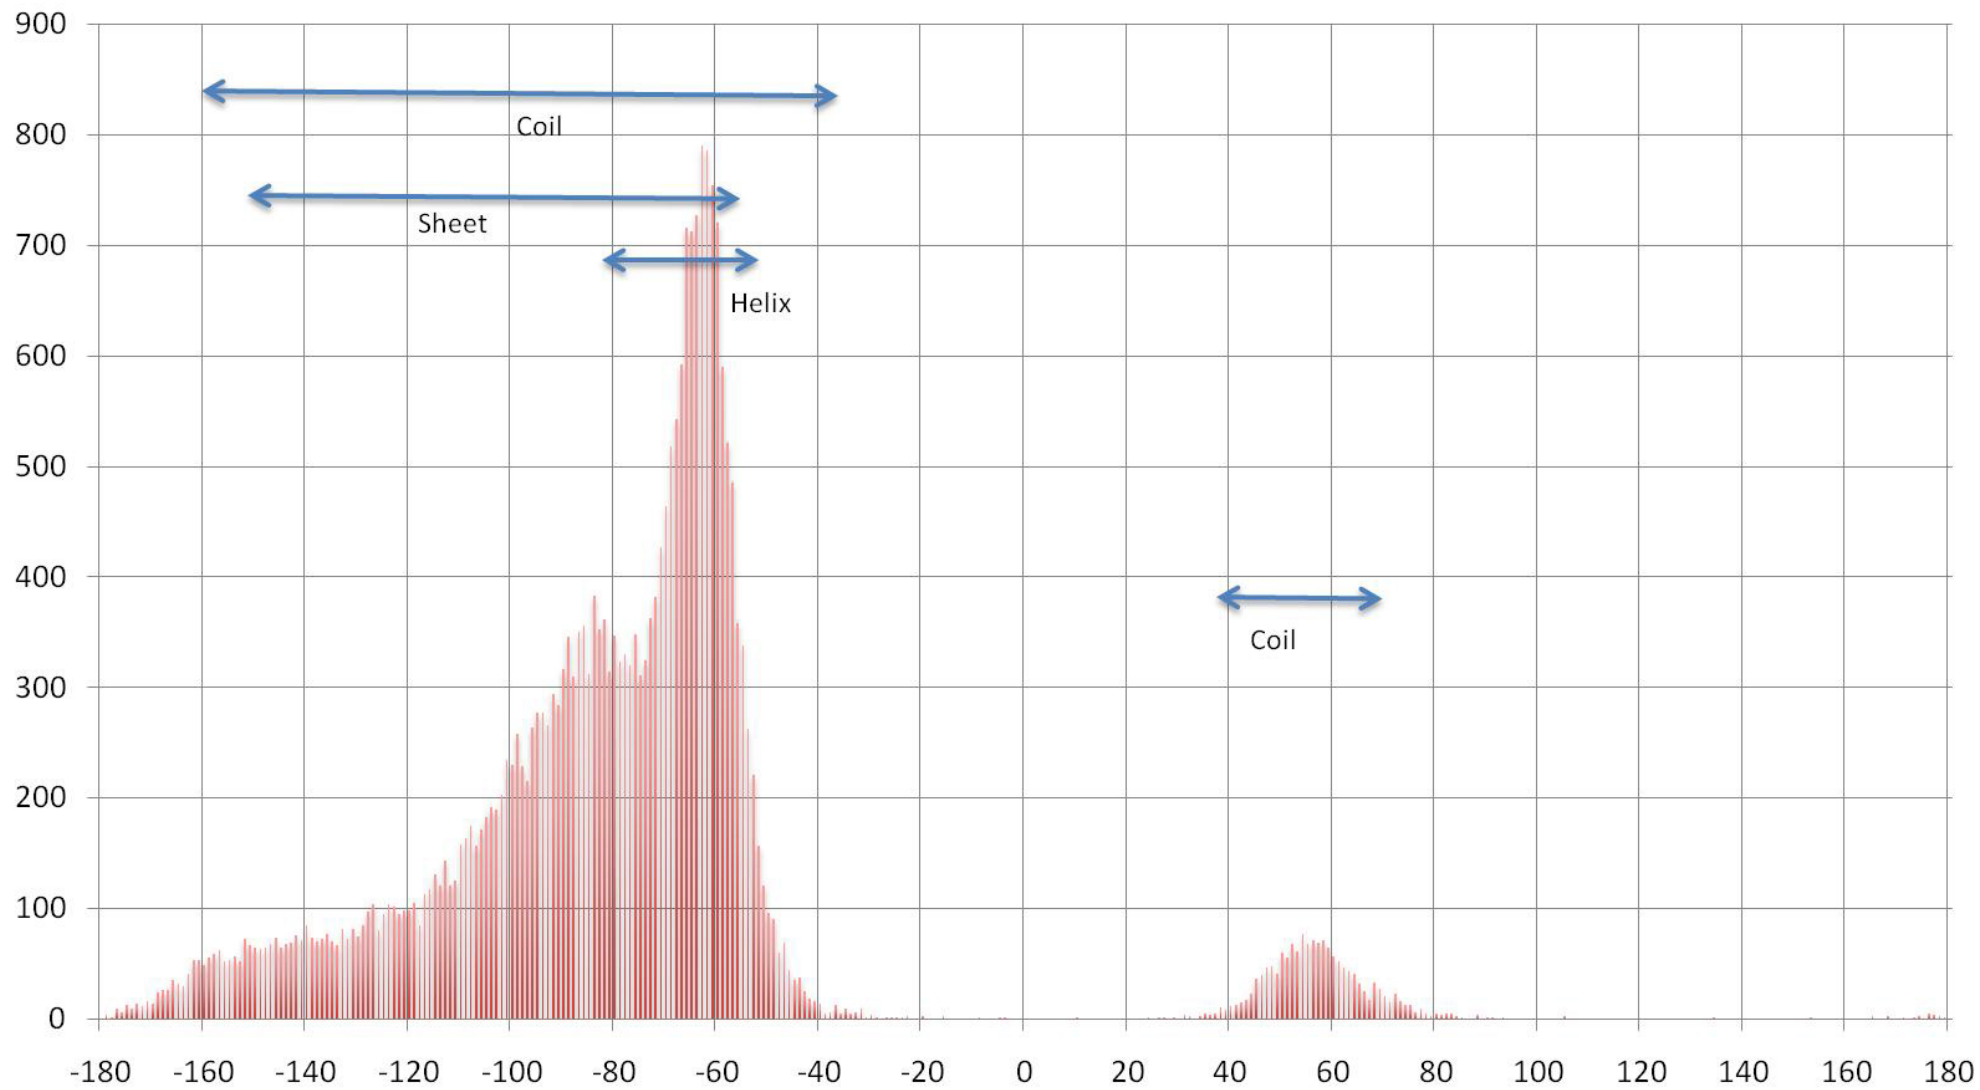

# Glutamate

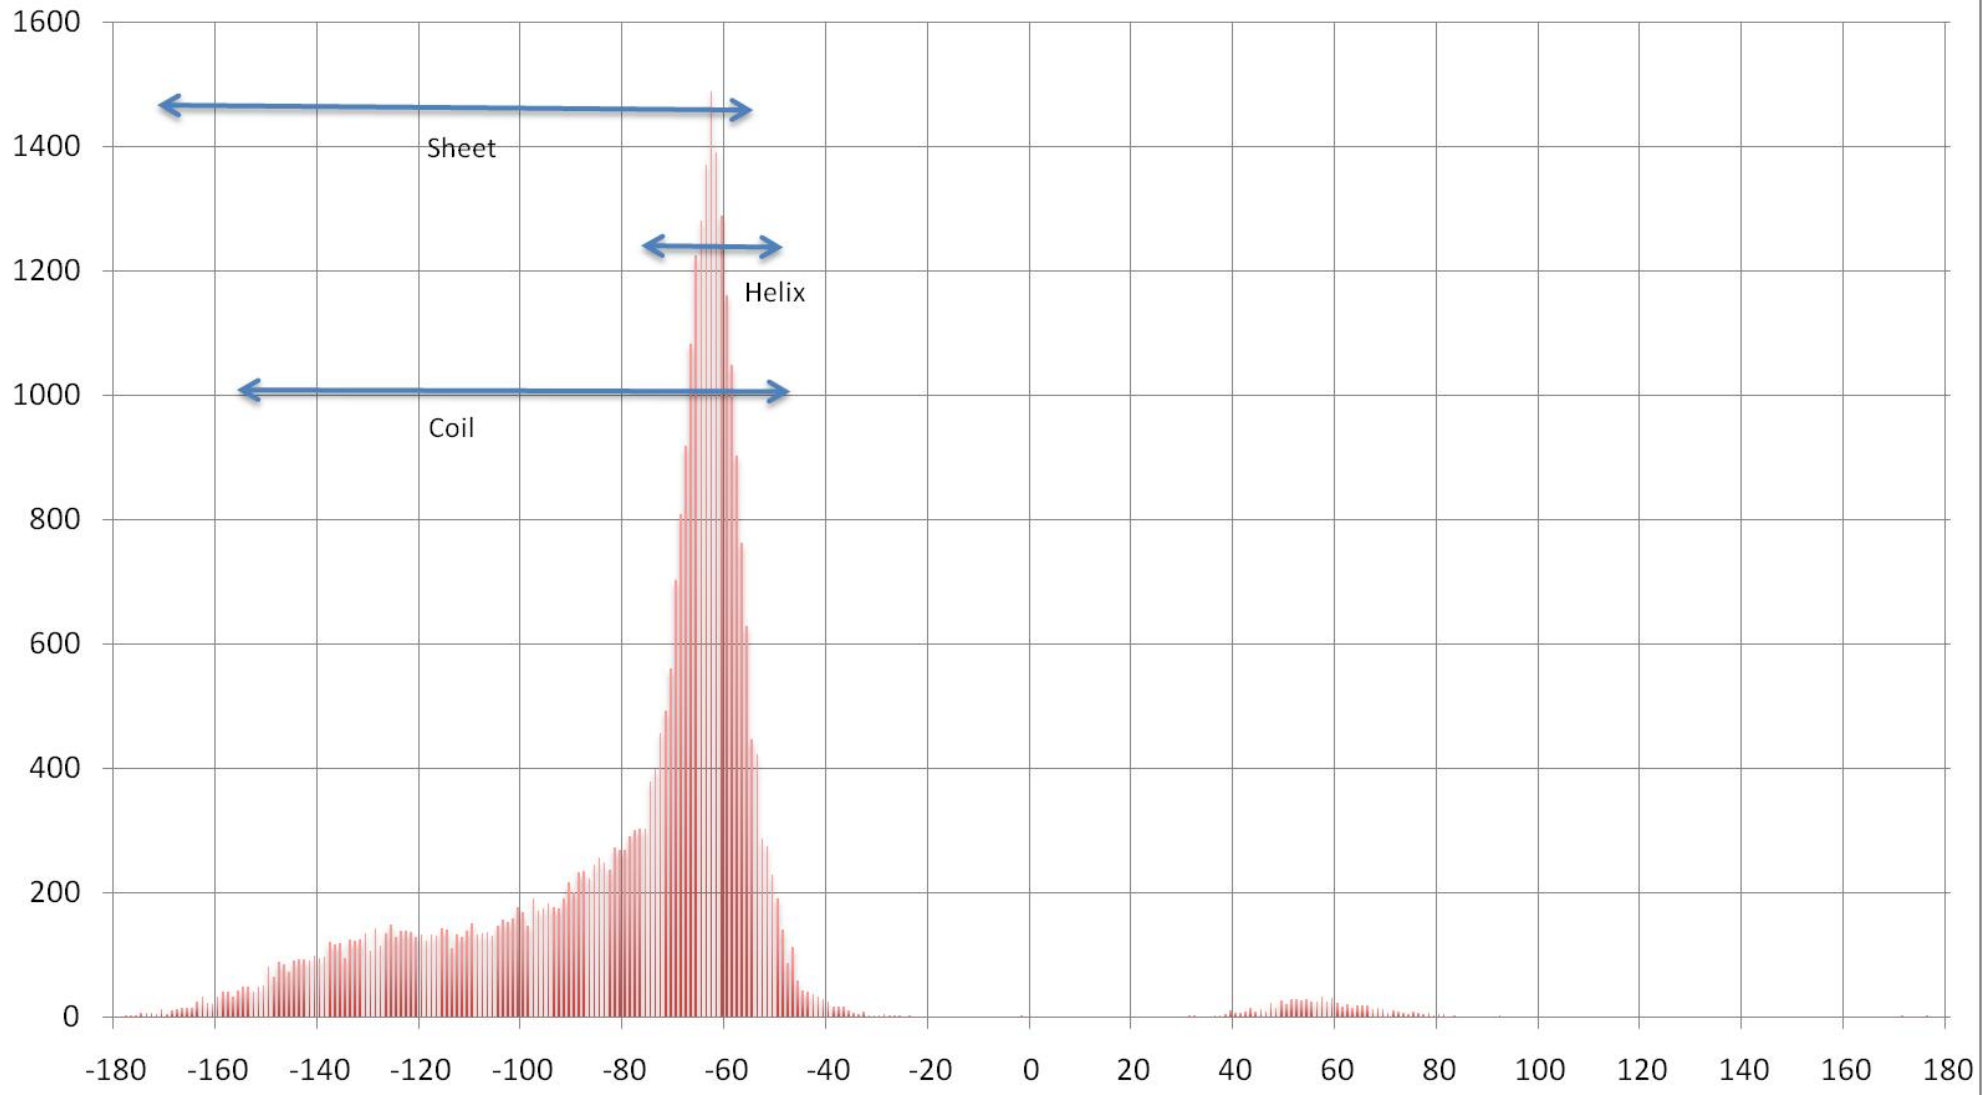

# Phenylalanine

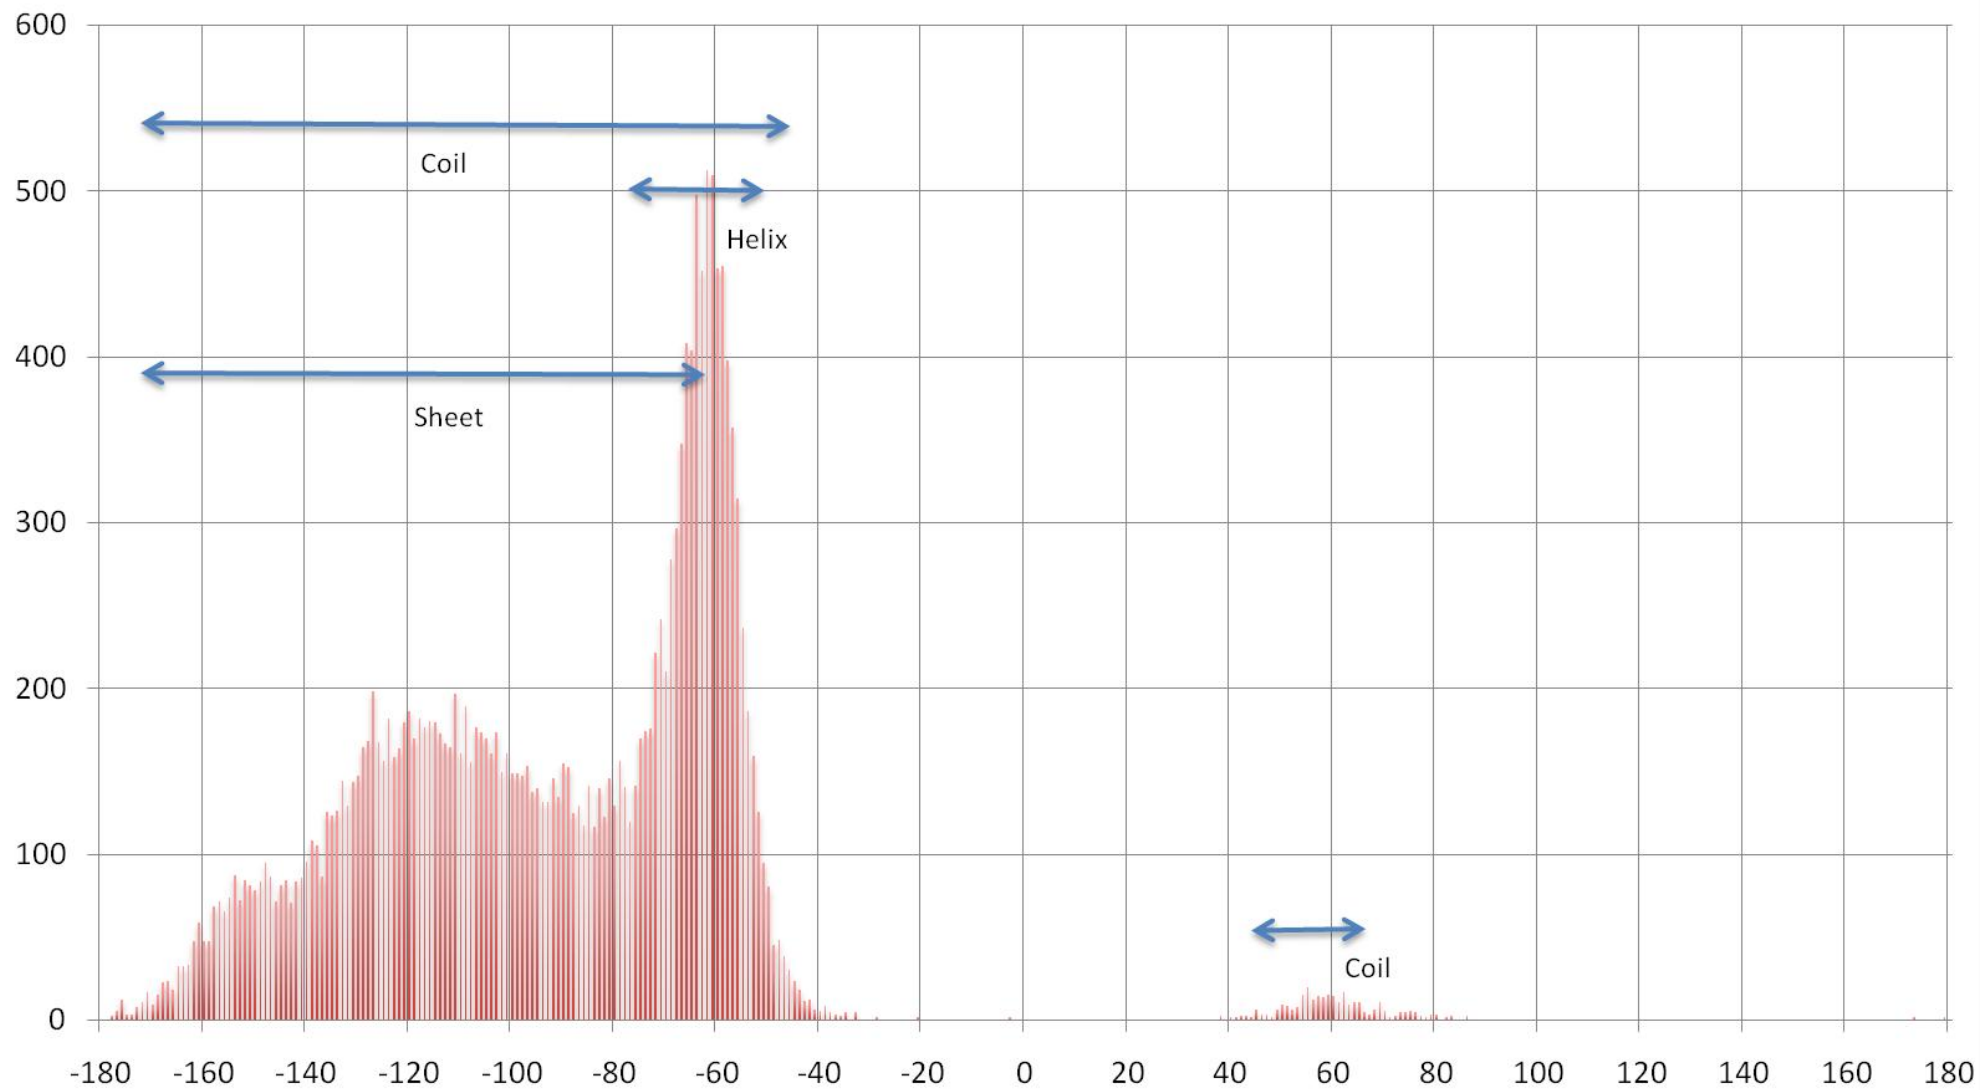

# Glycine

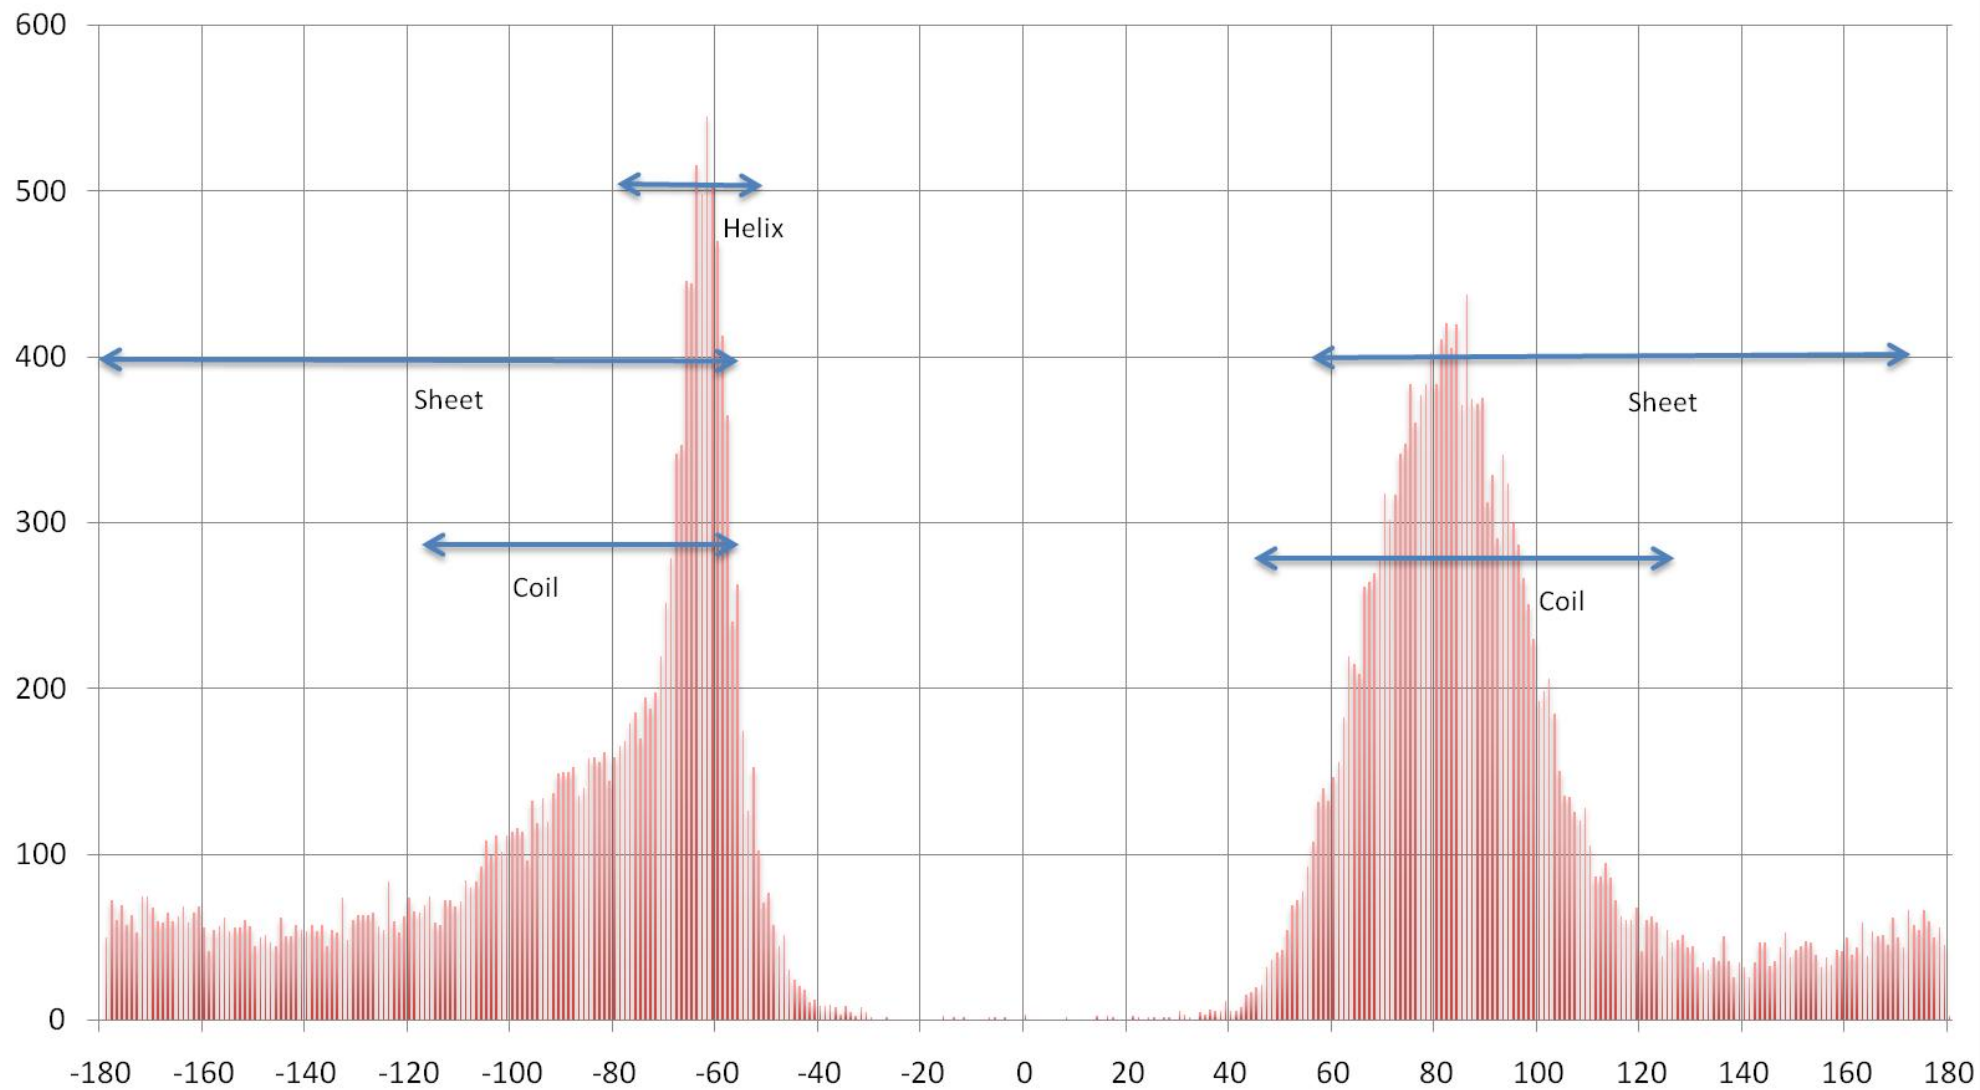

# Histidine

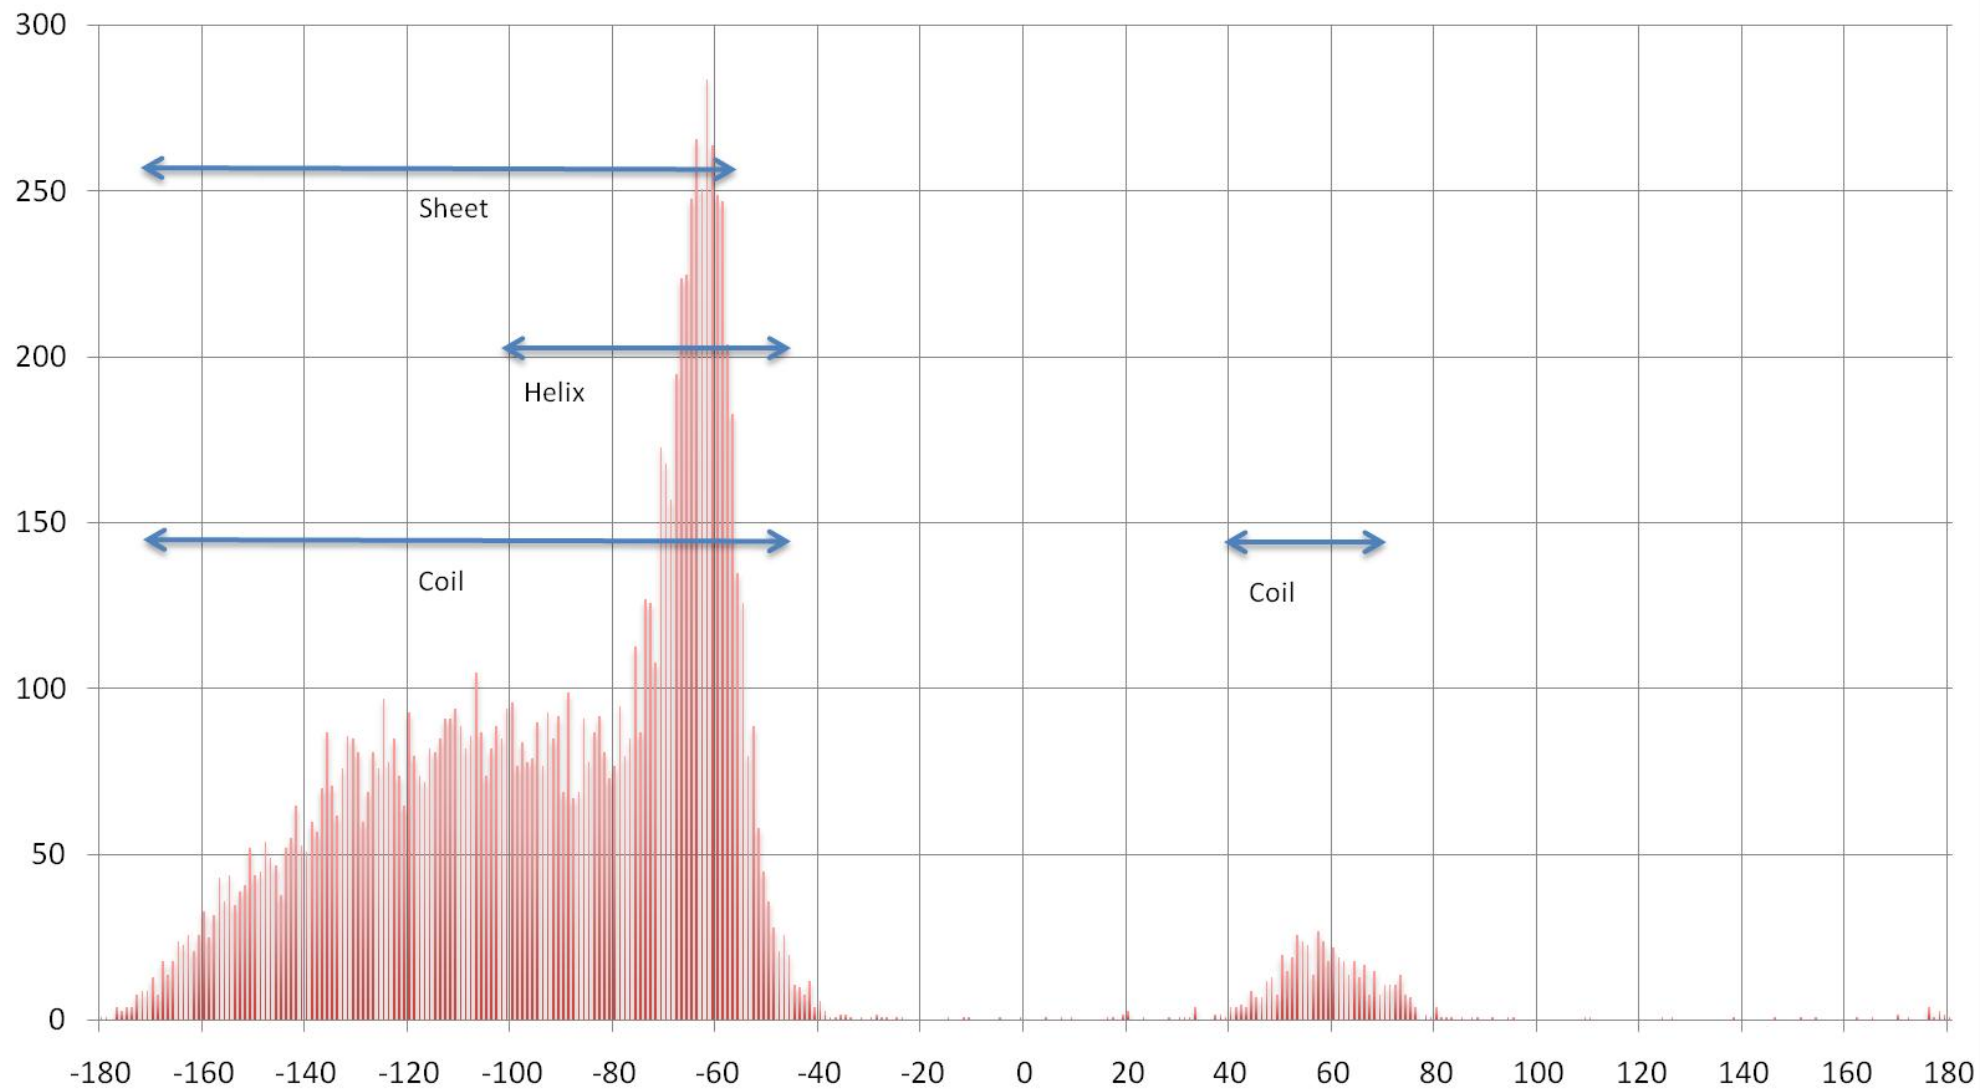



# Isoleucine

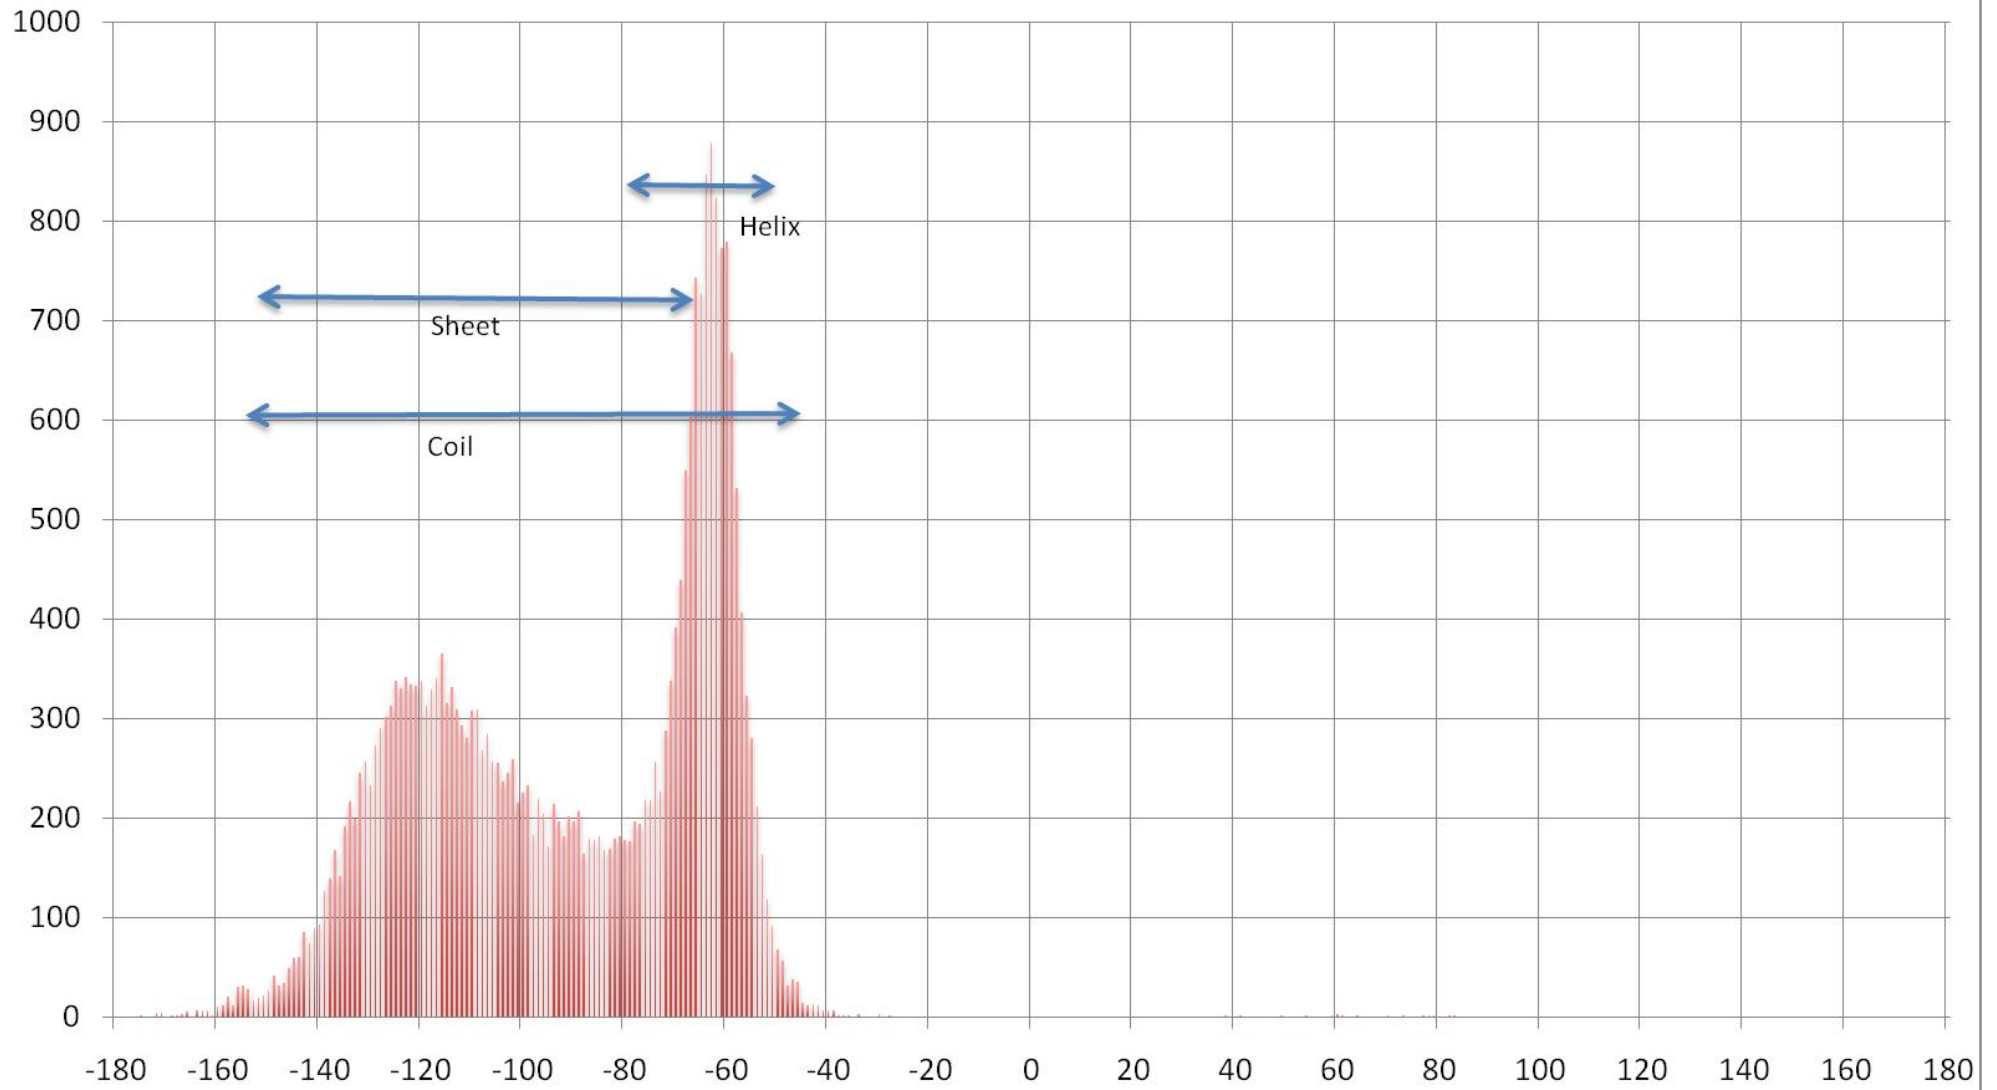

# Lysine

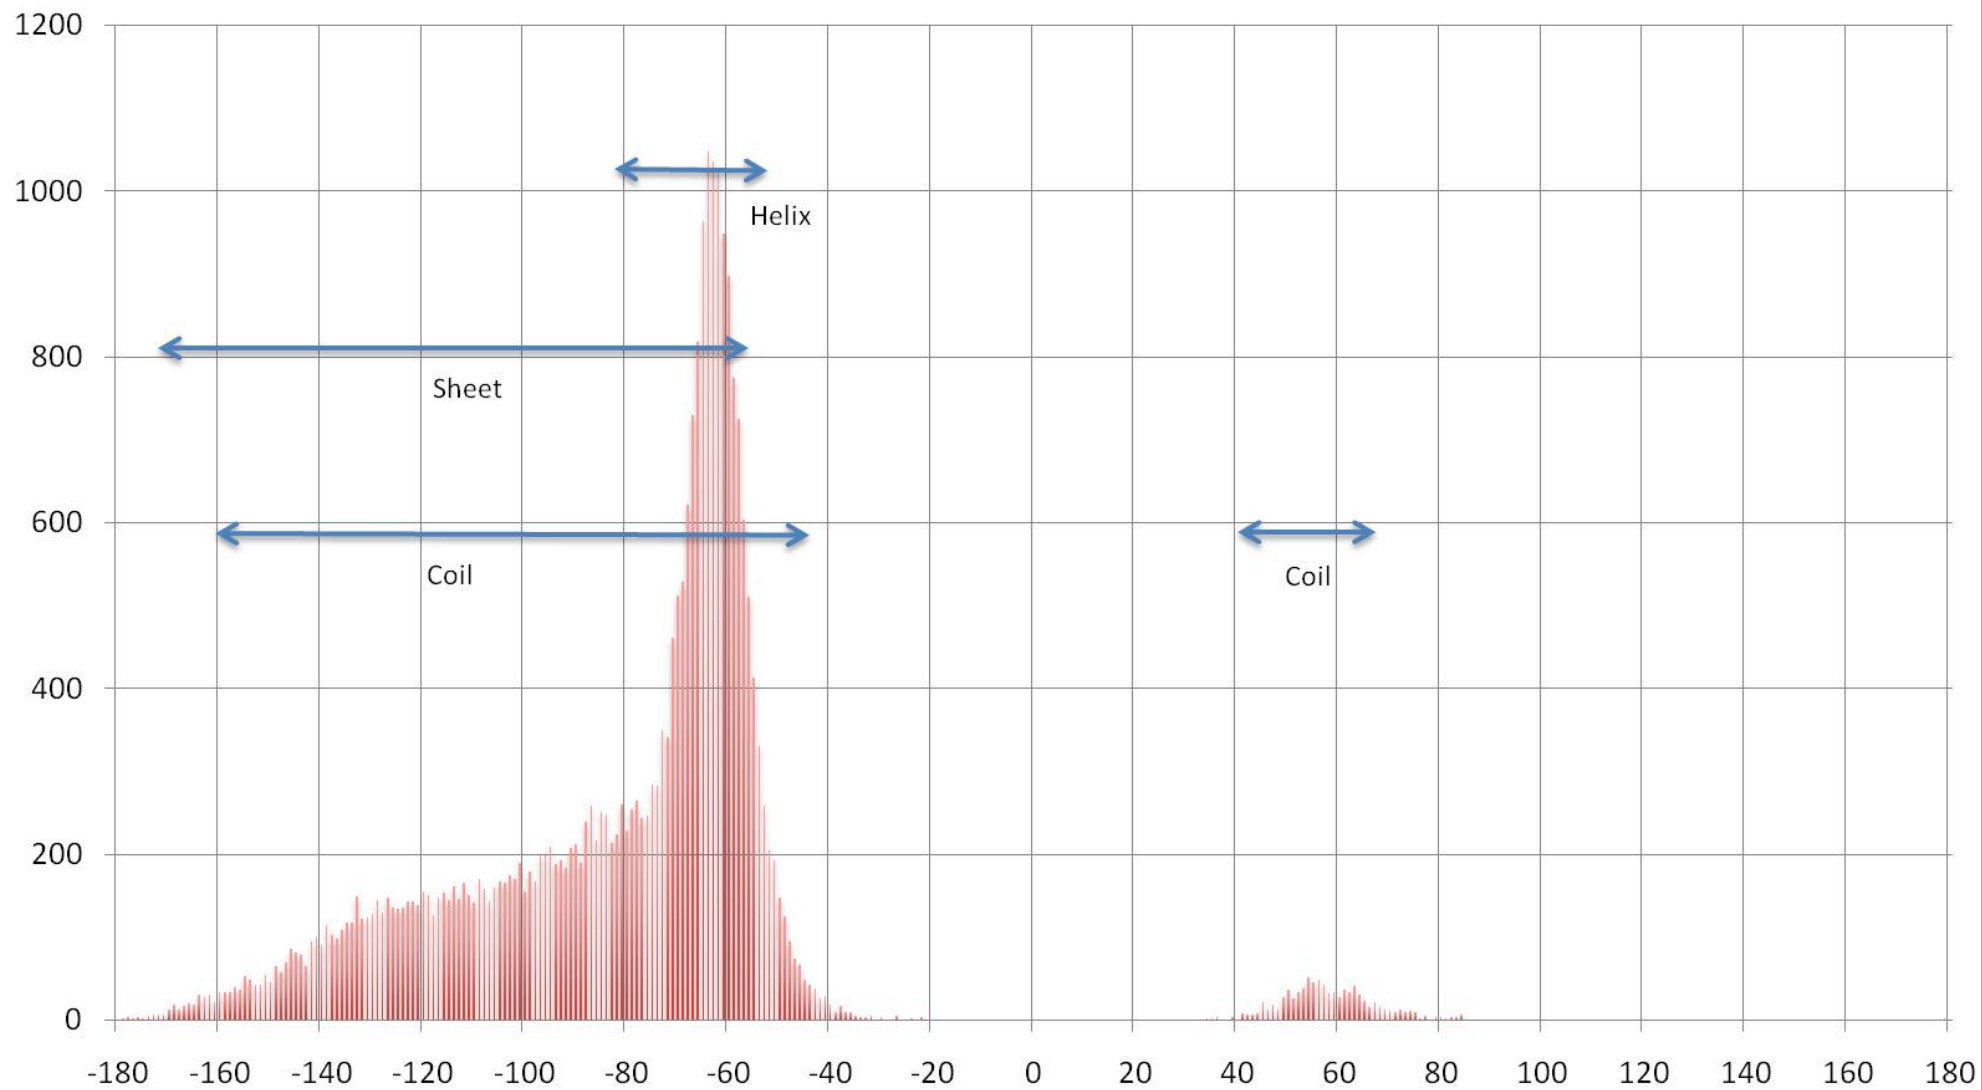

# Leucine

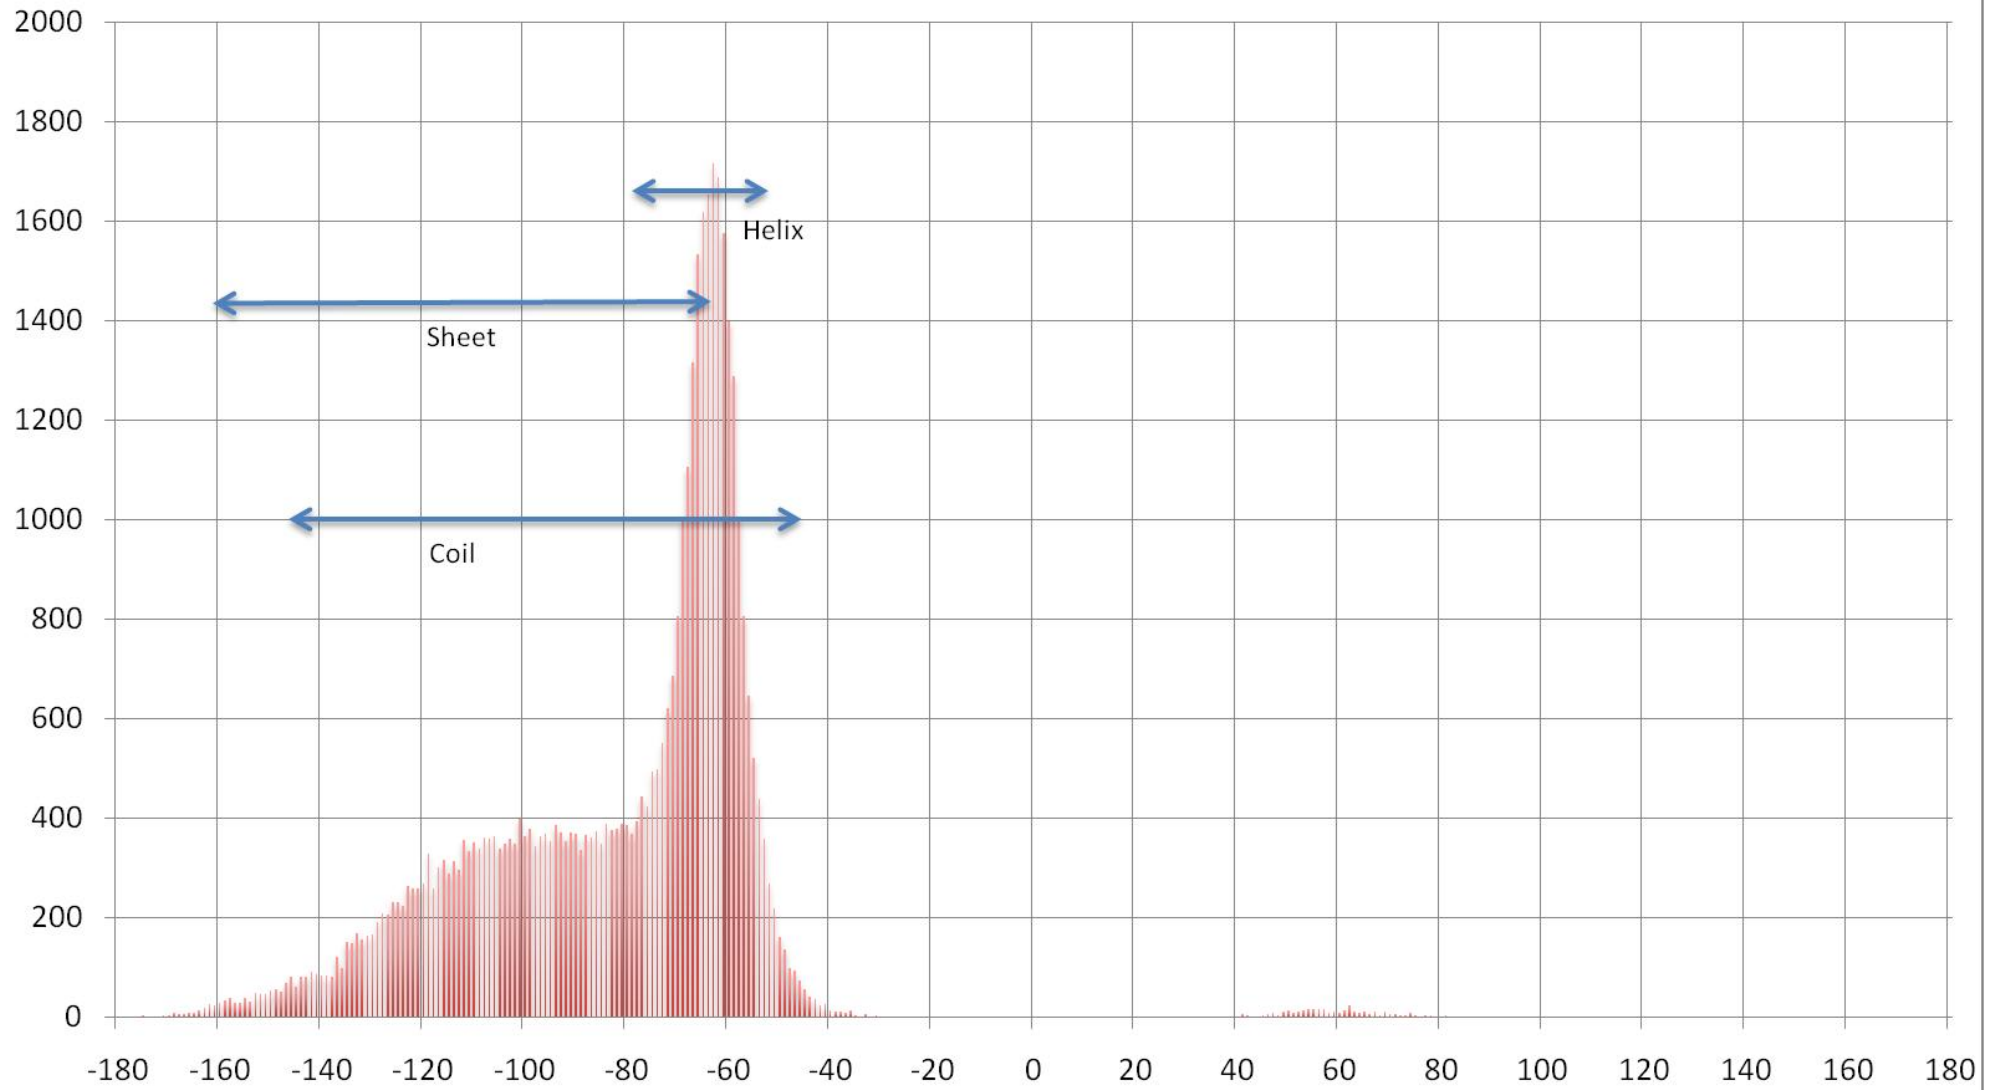

# Methionine

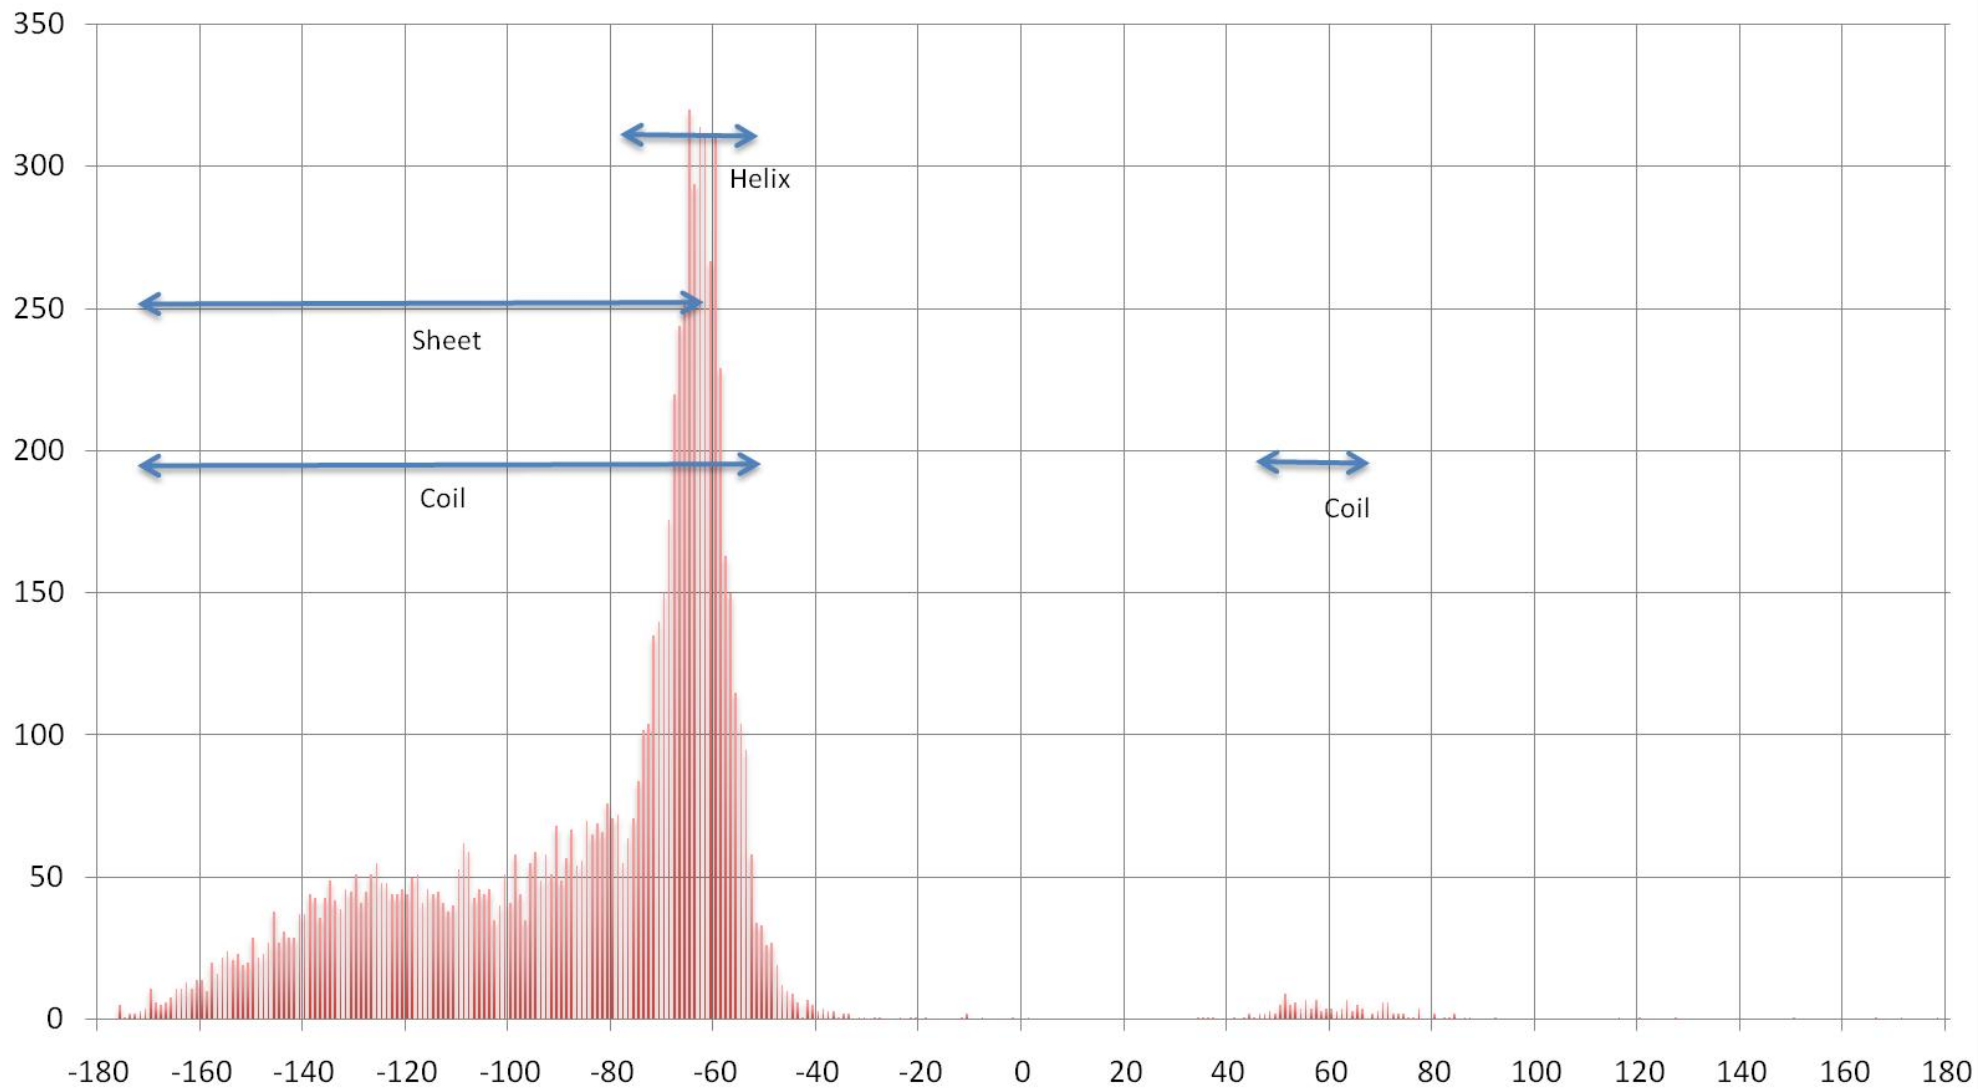

# Asparagine

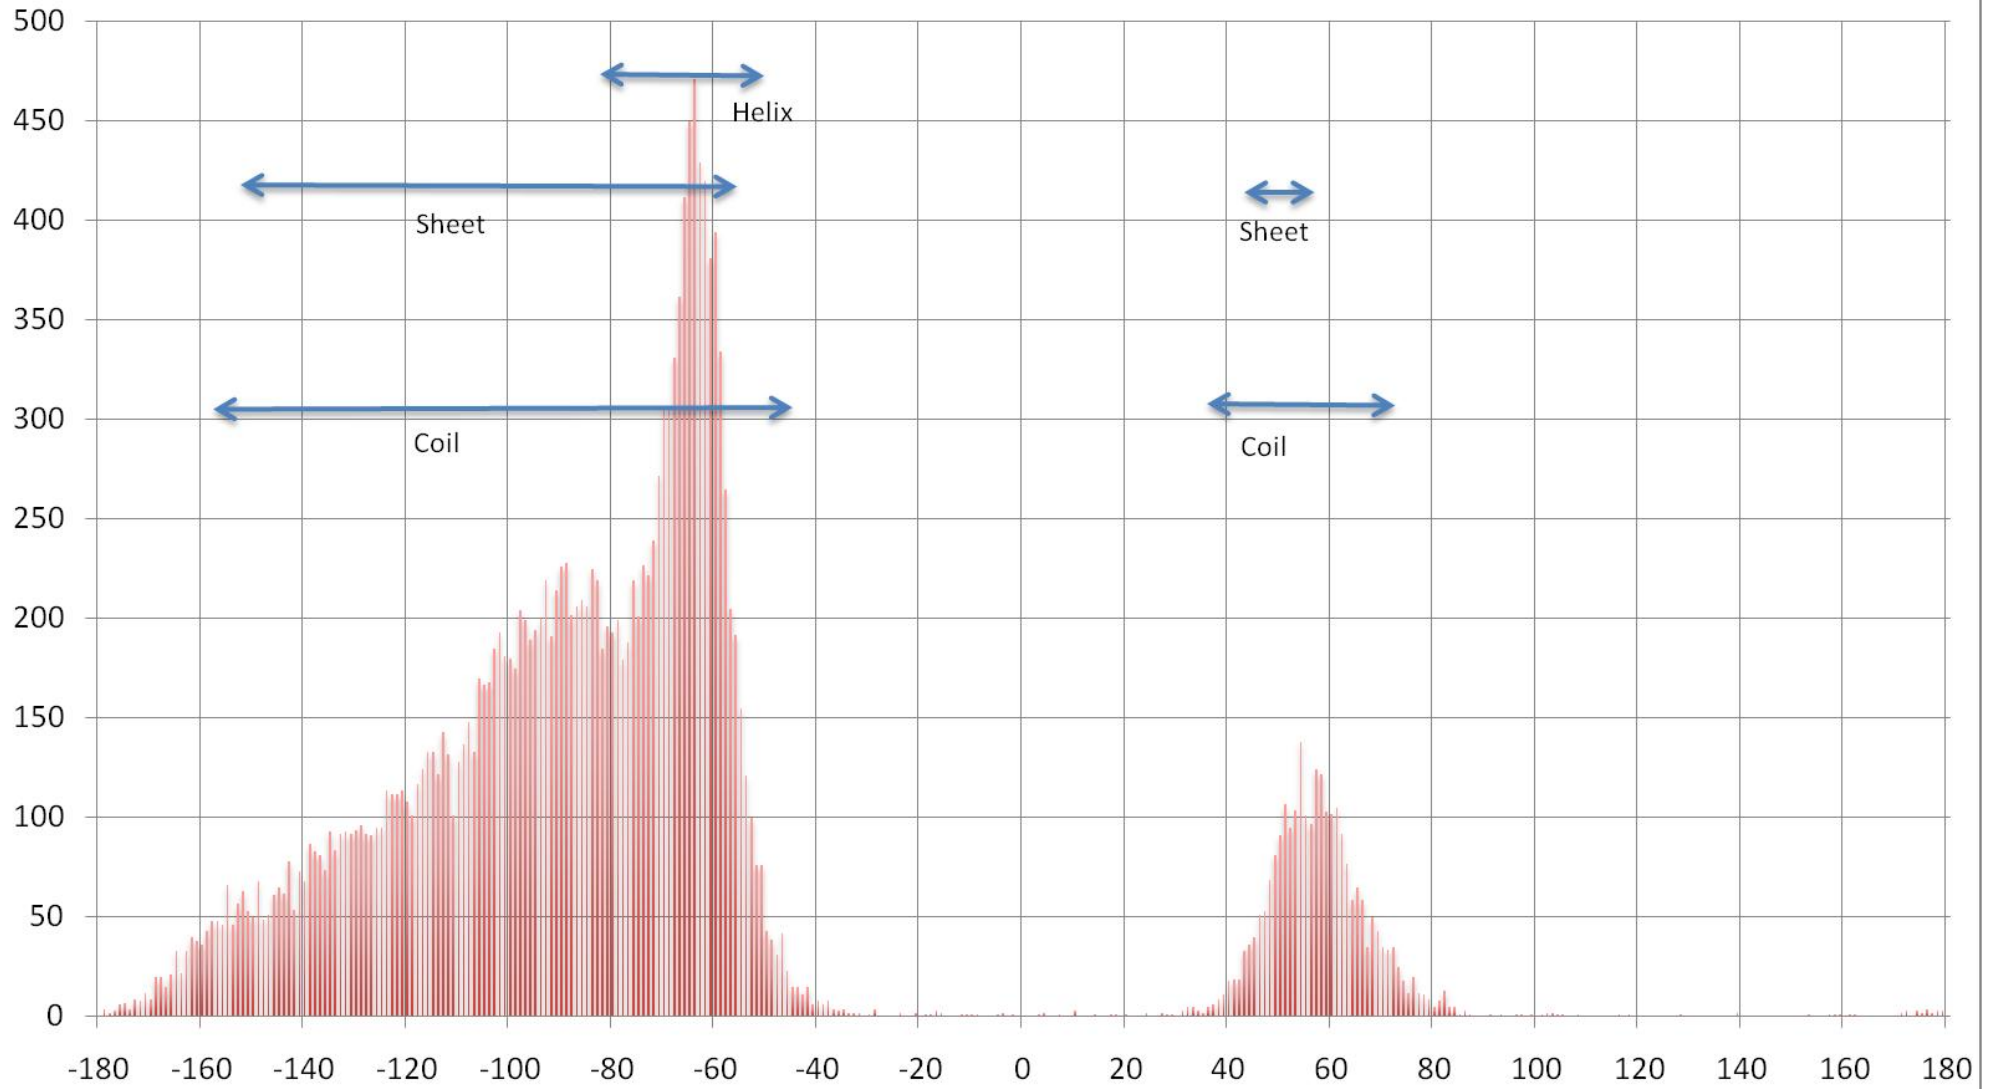

# Proline

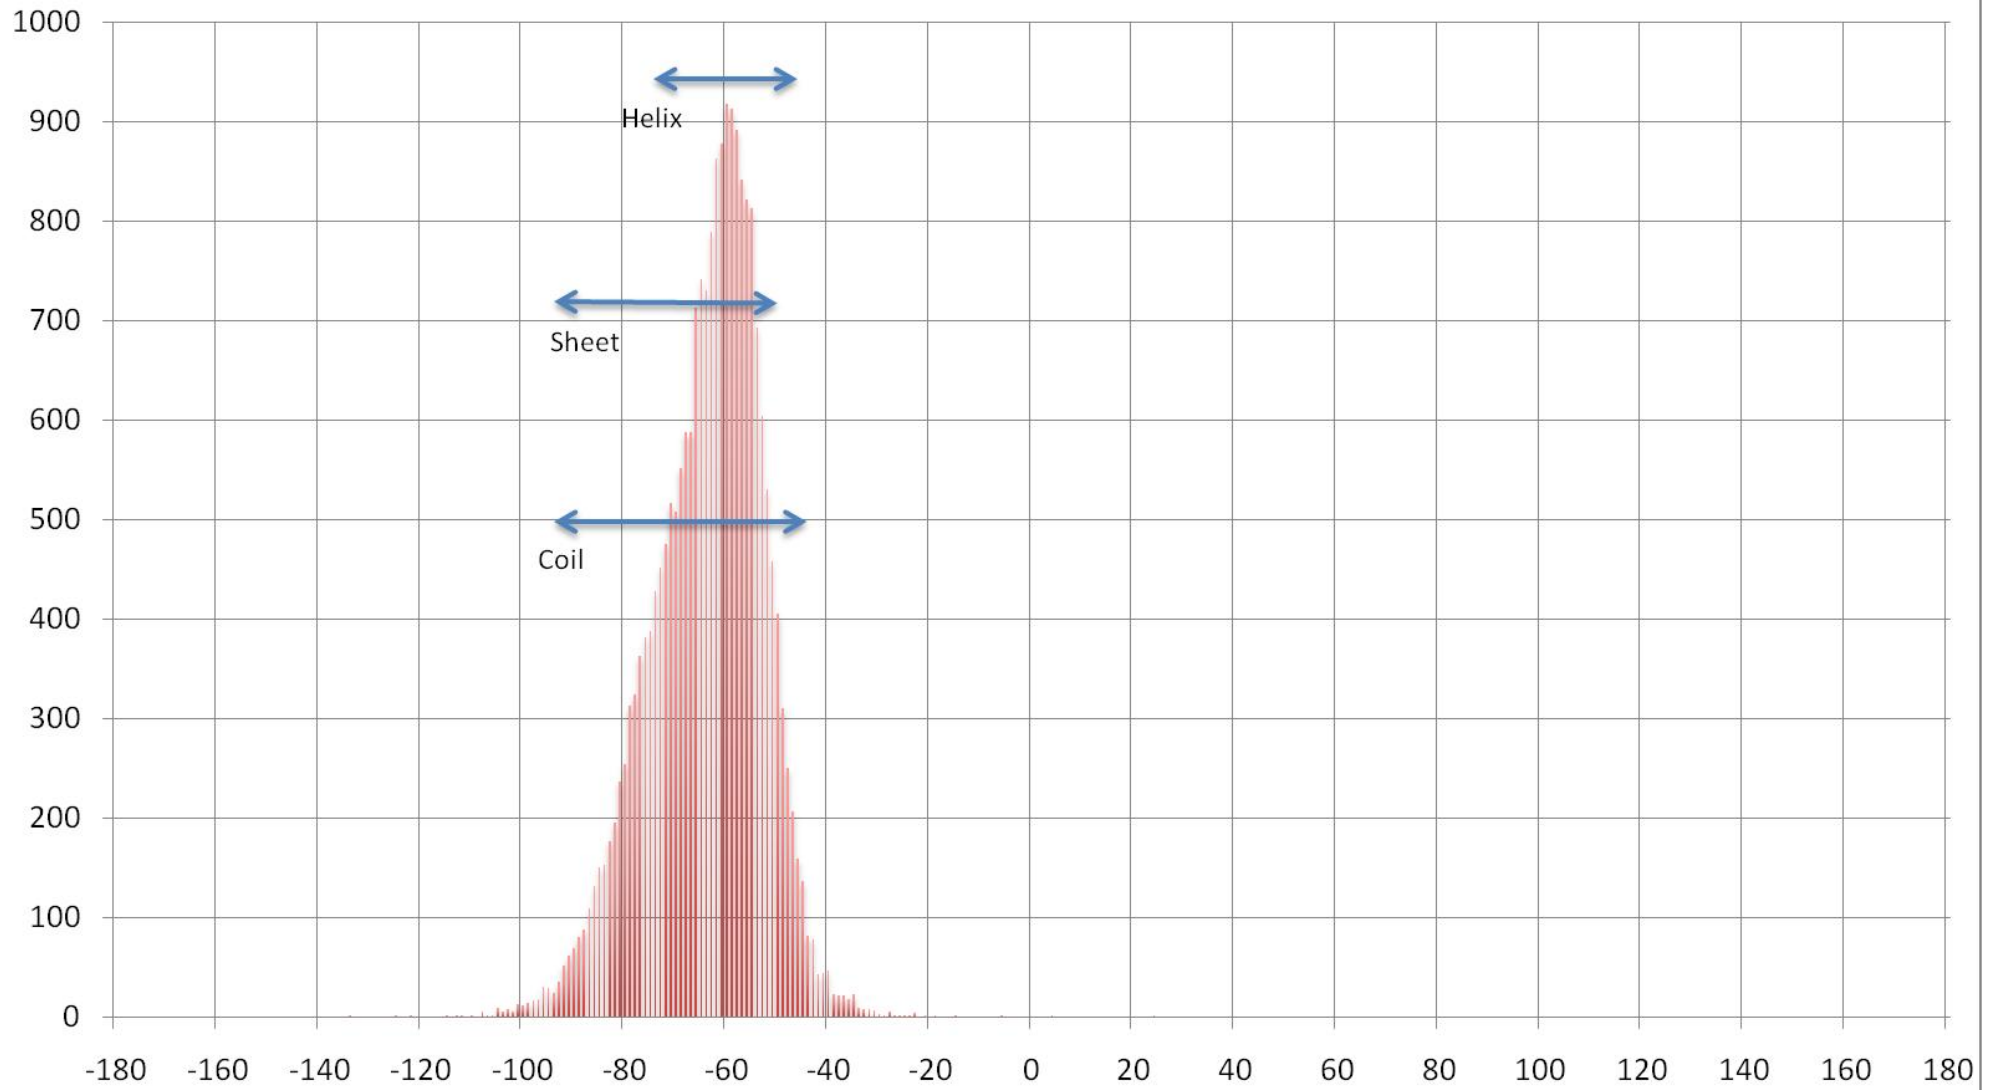

# Glutamine

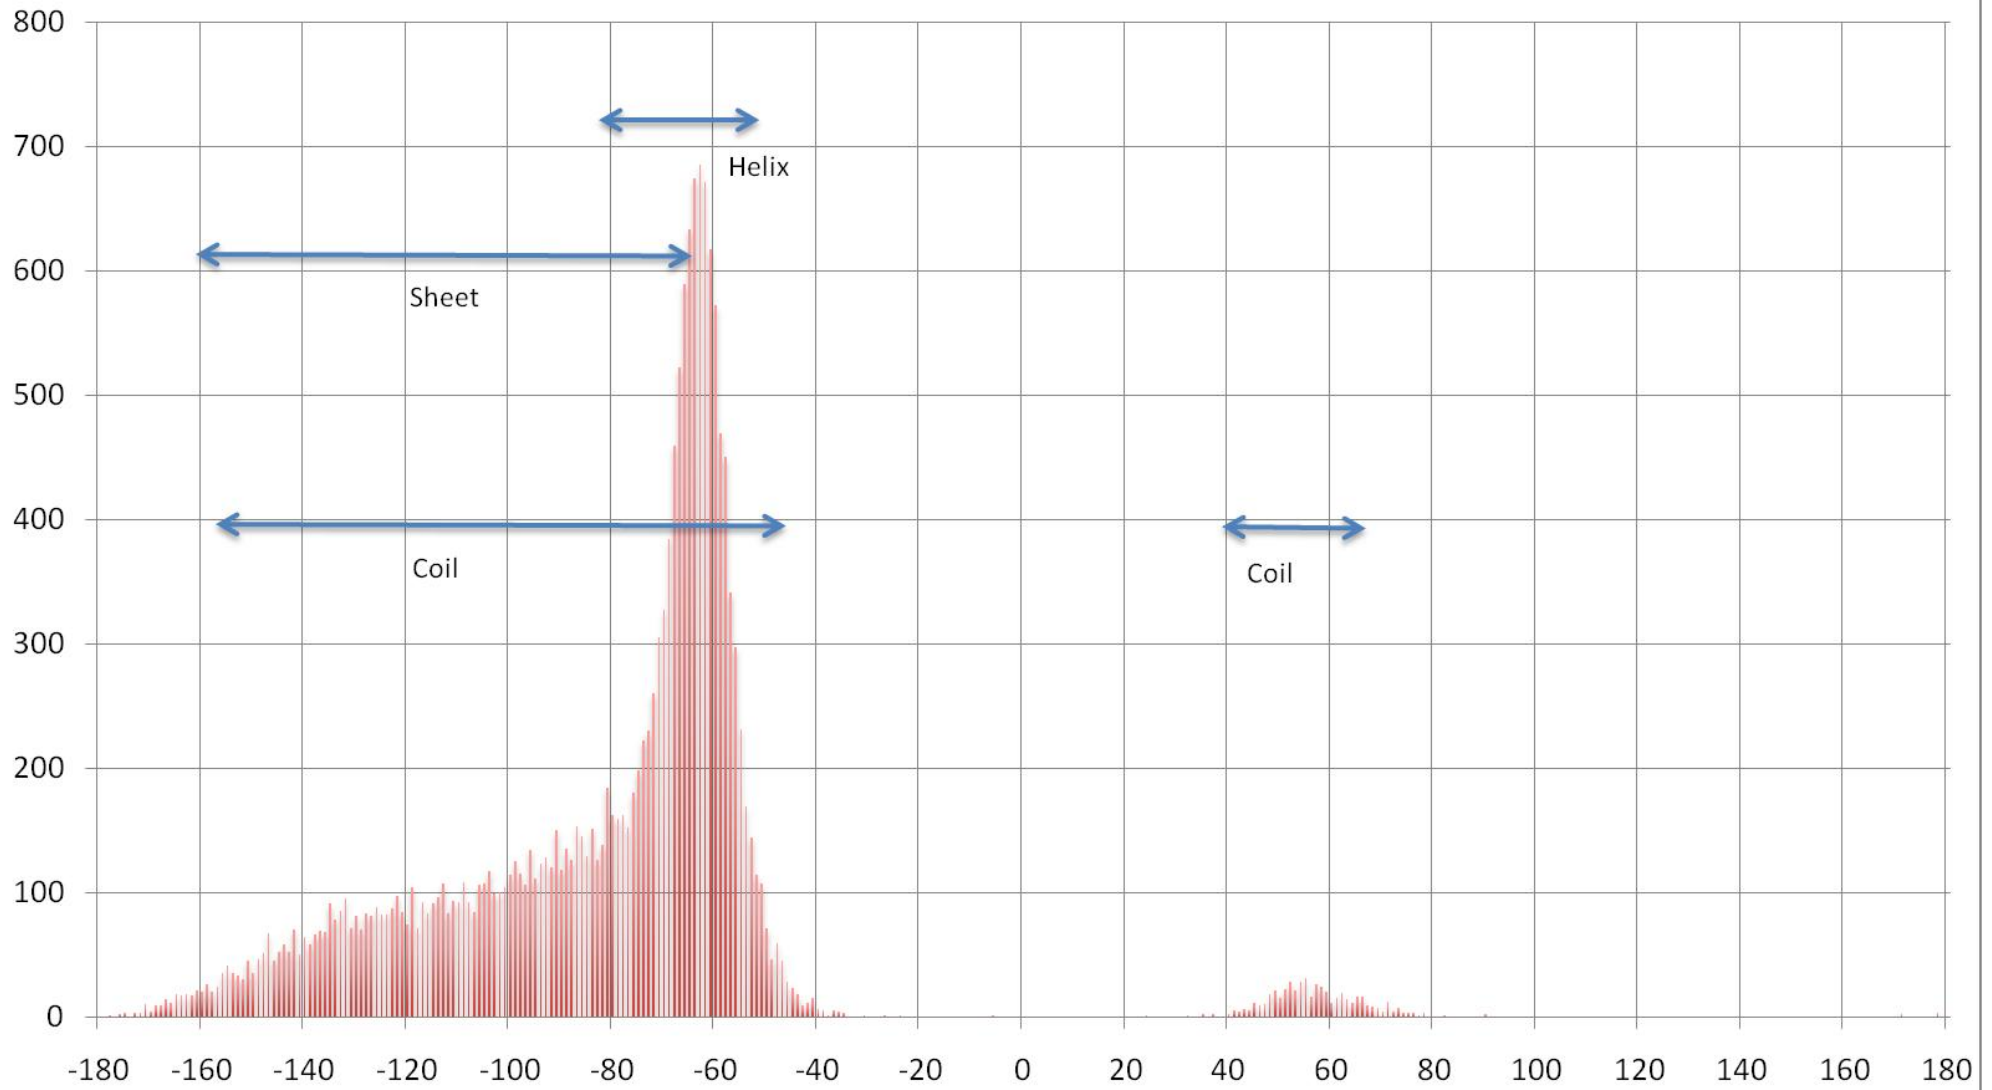

# Arginine

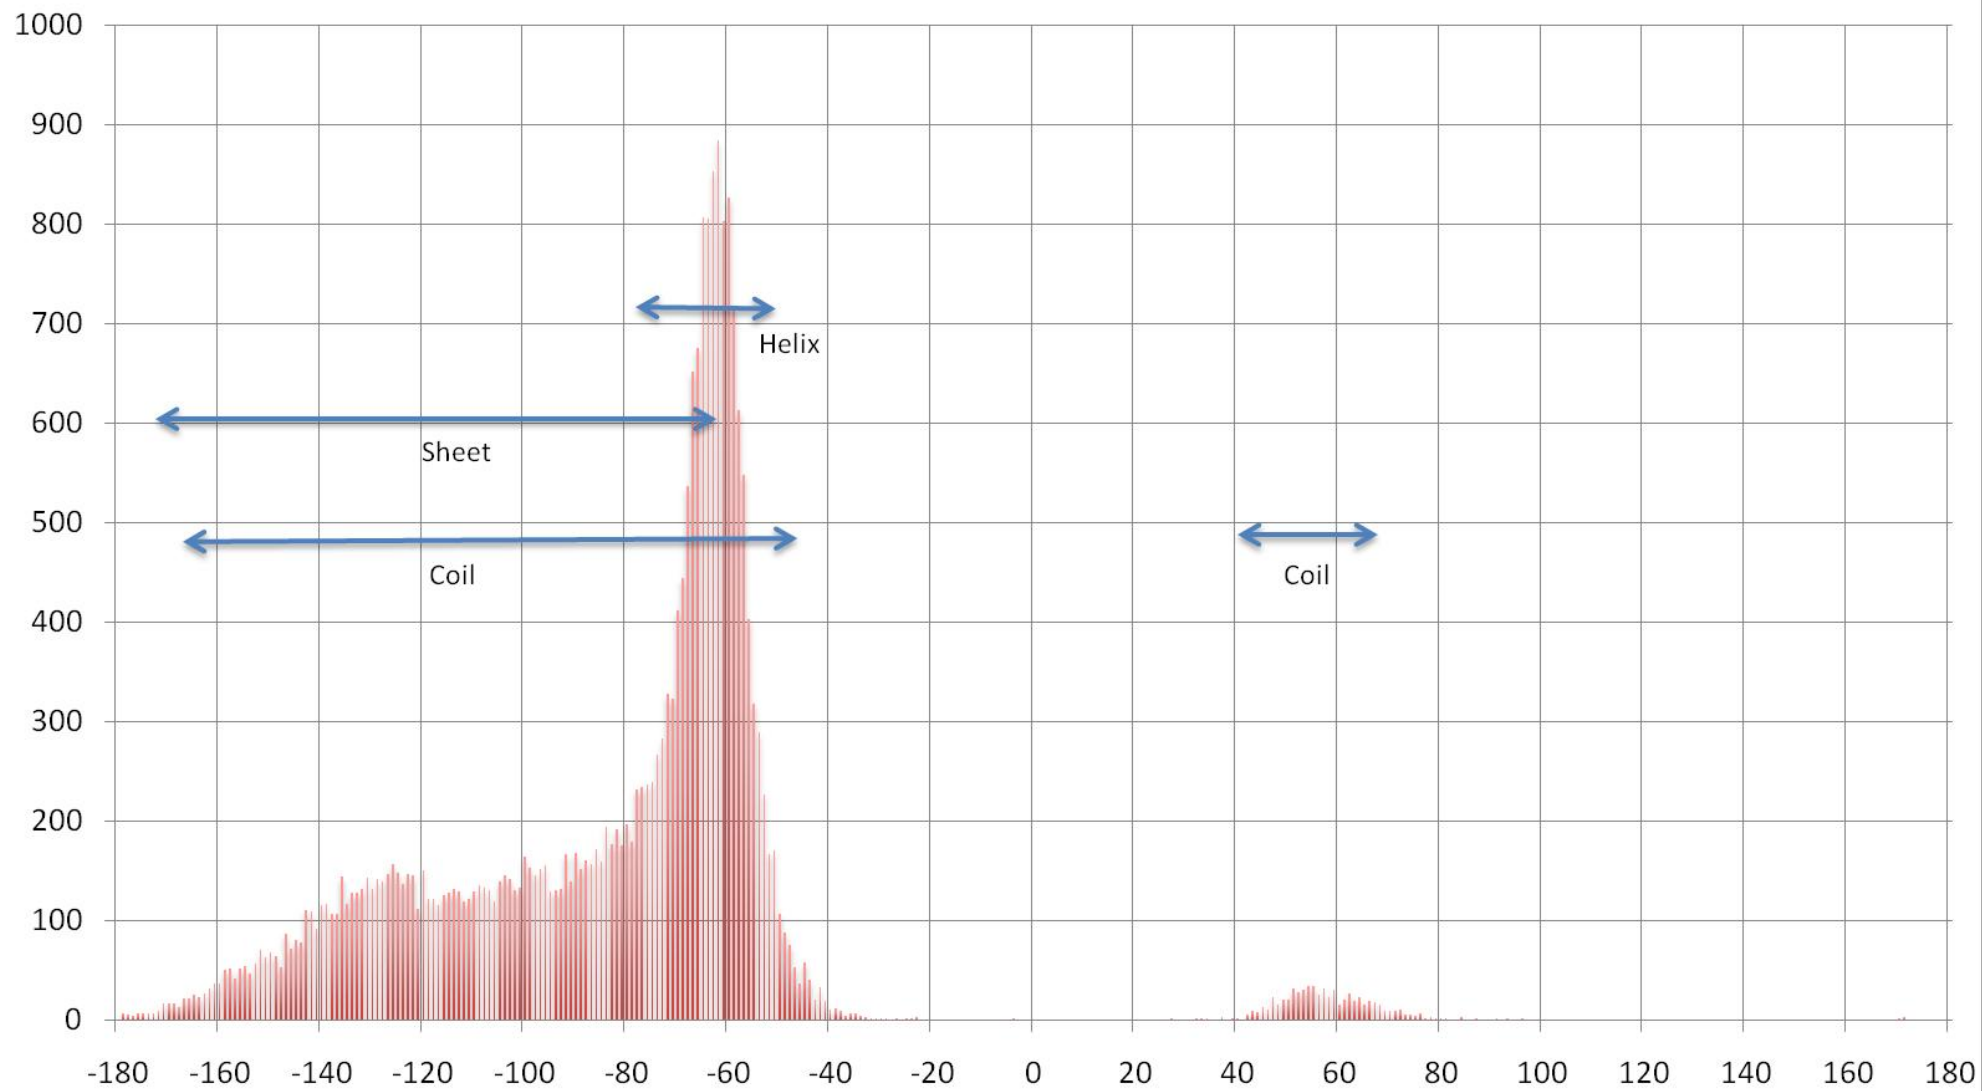



# Serine

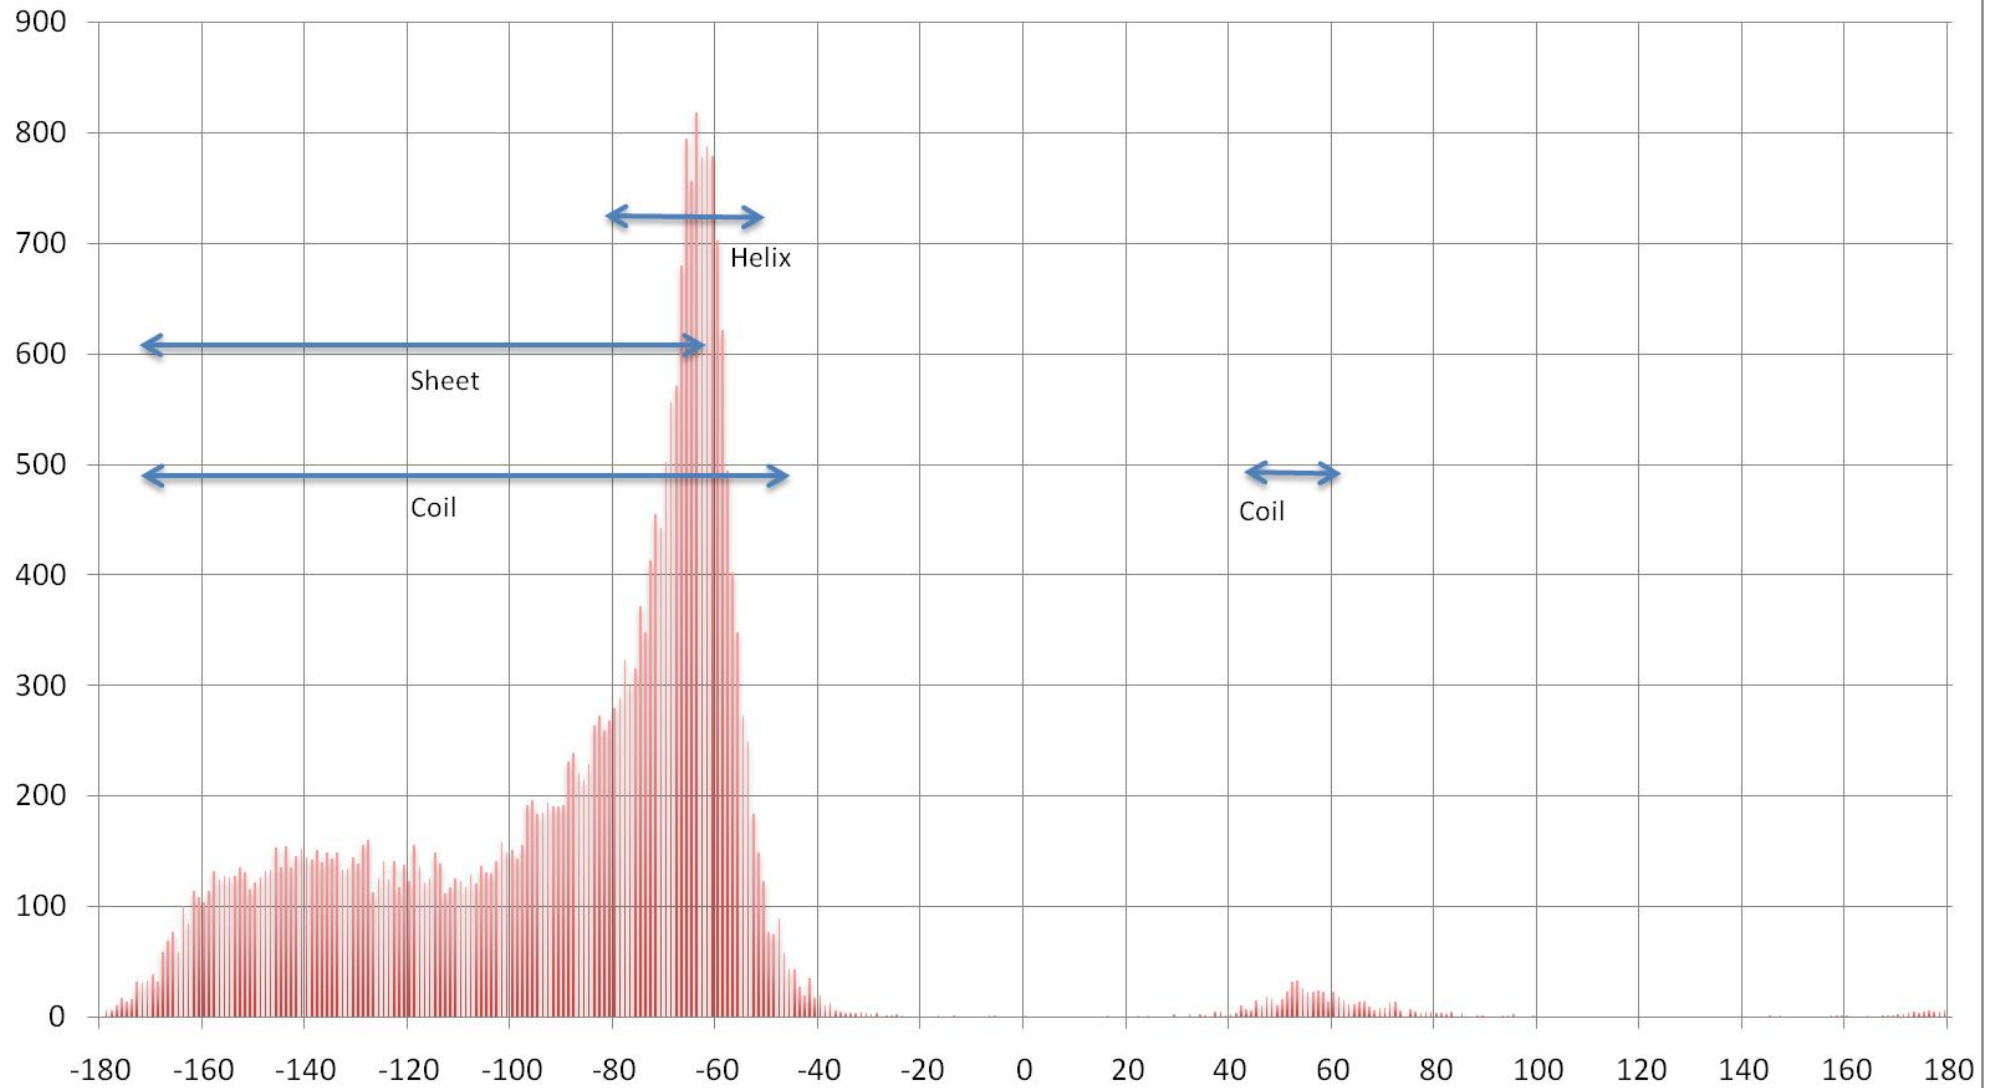

# Threonine

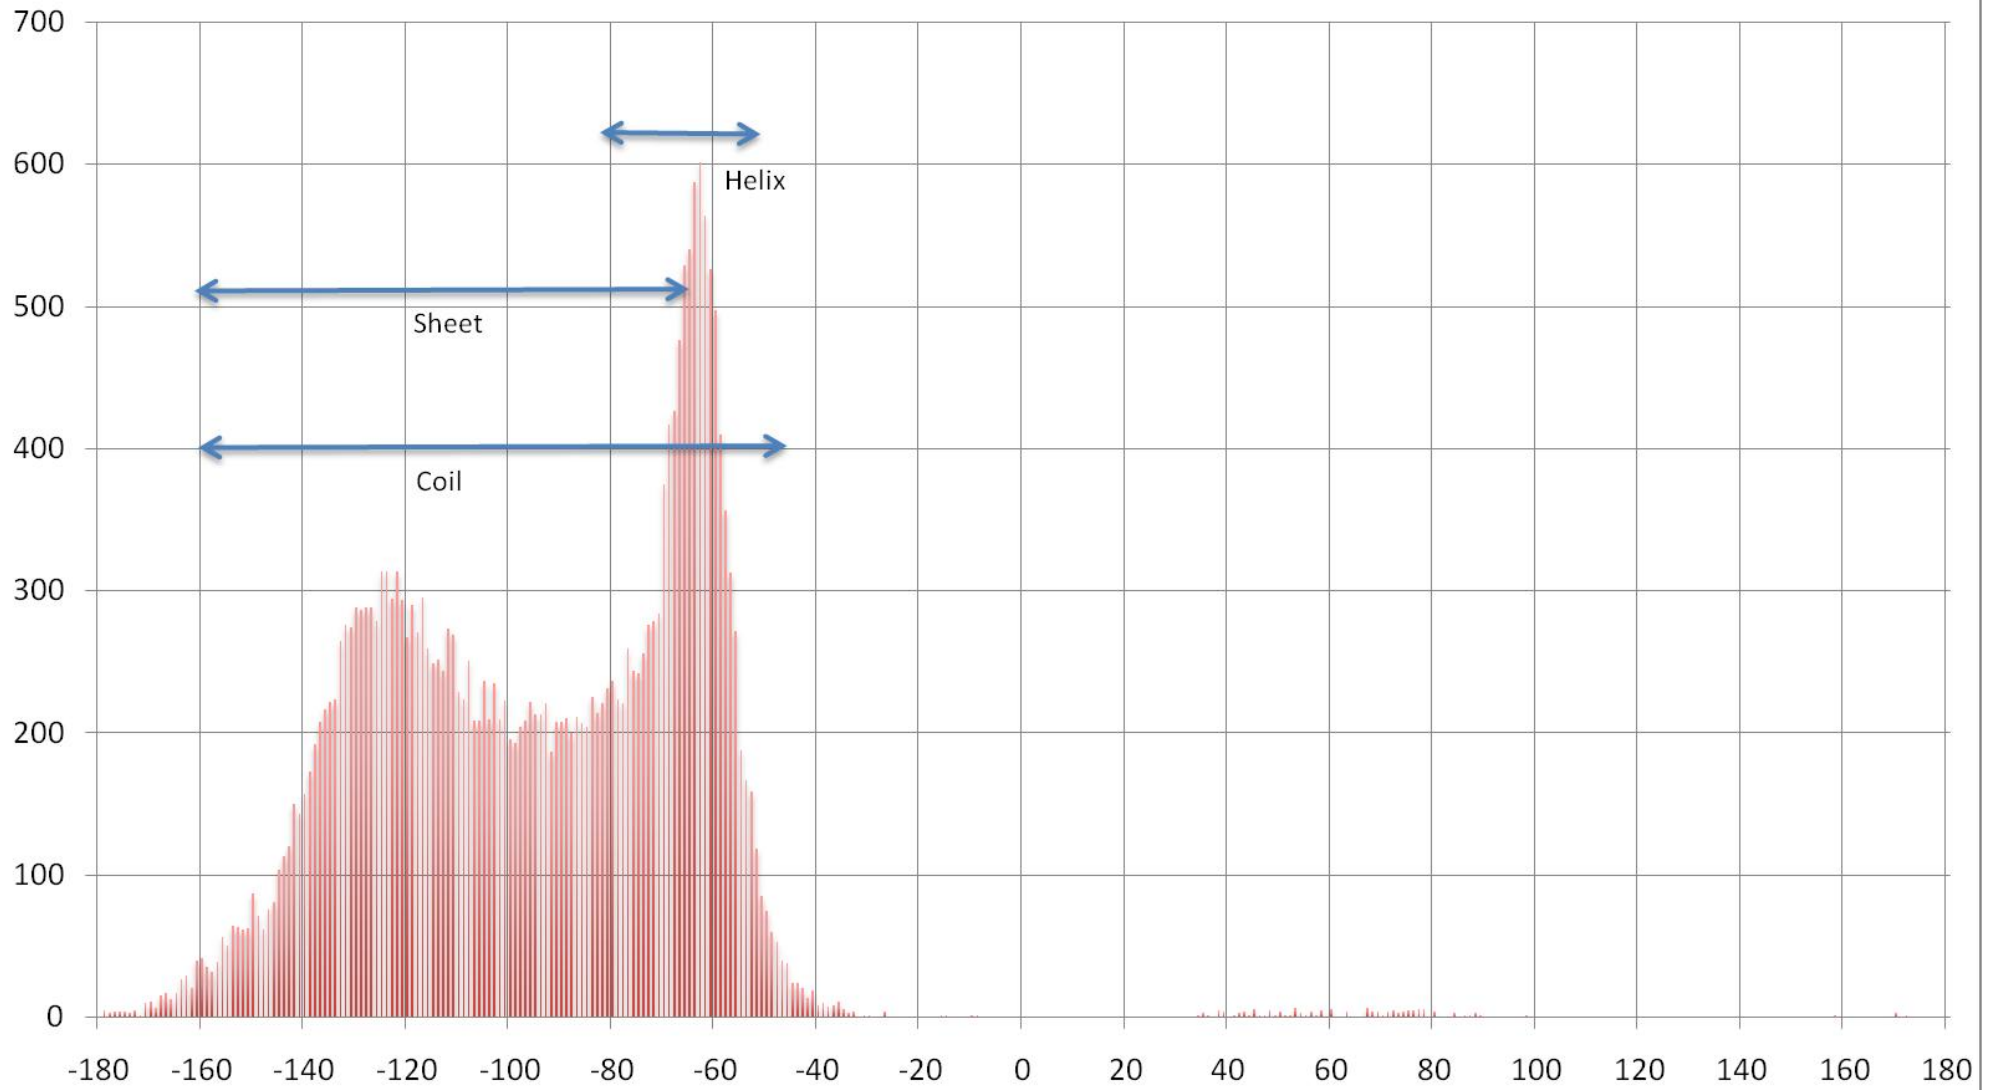

# Valine

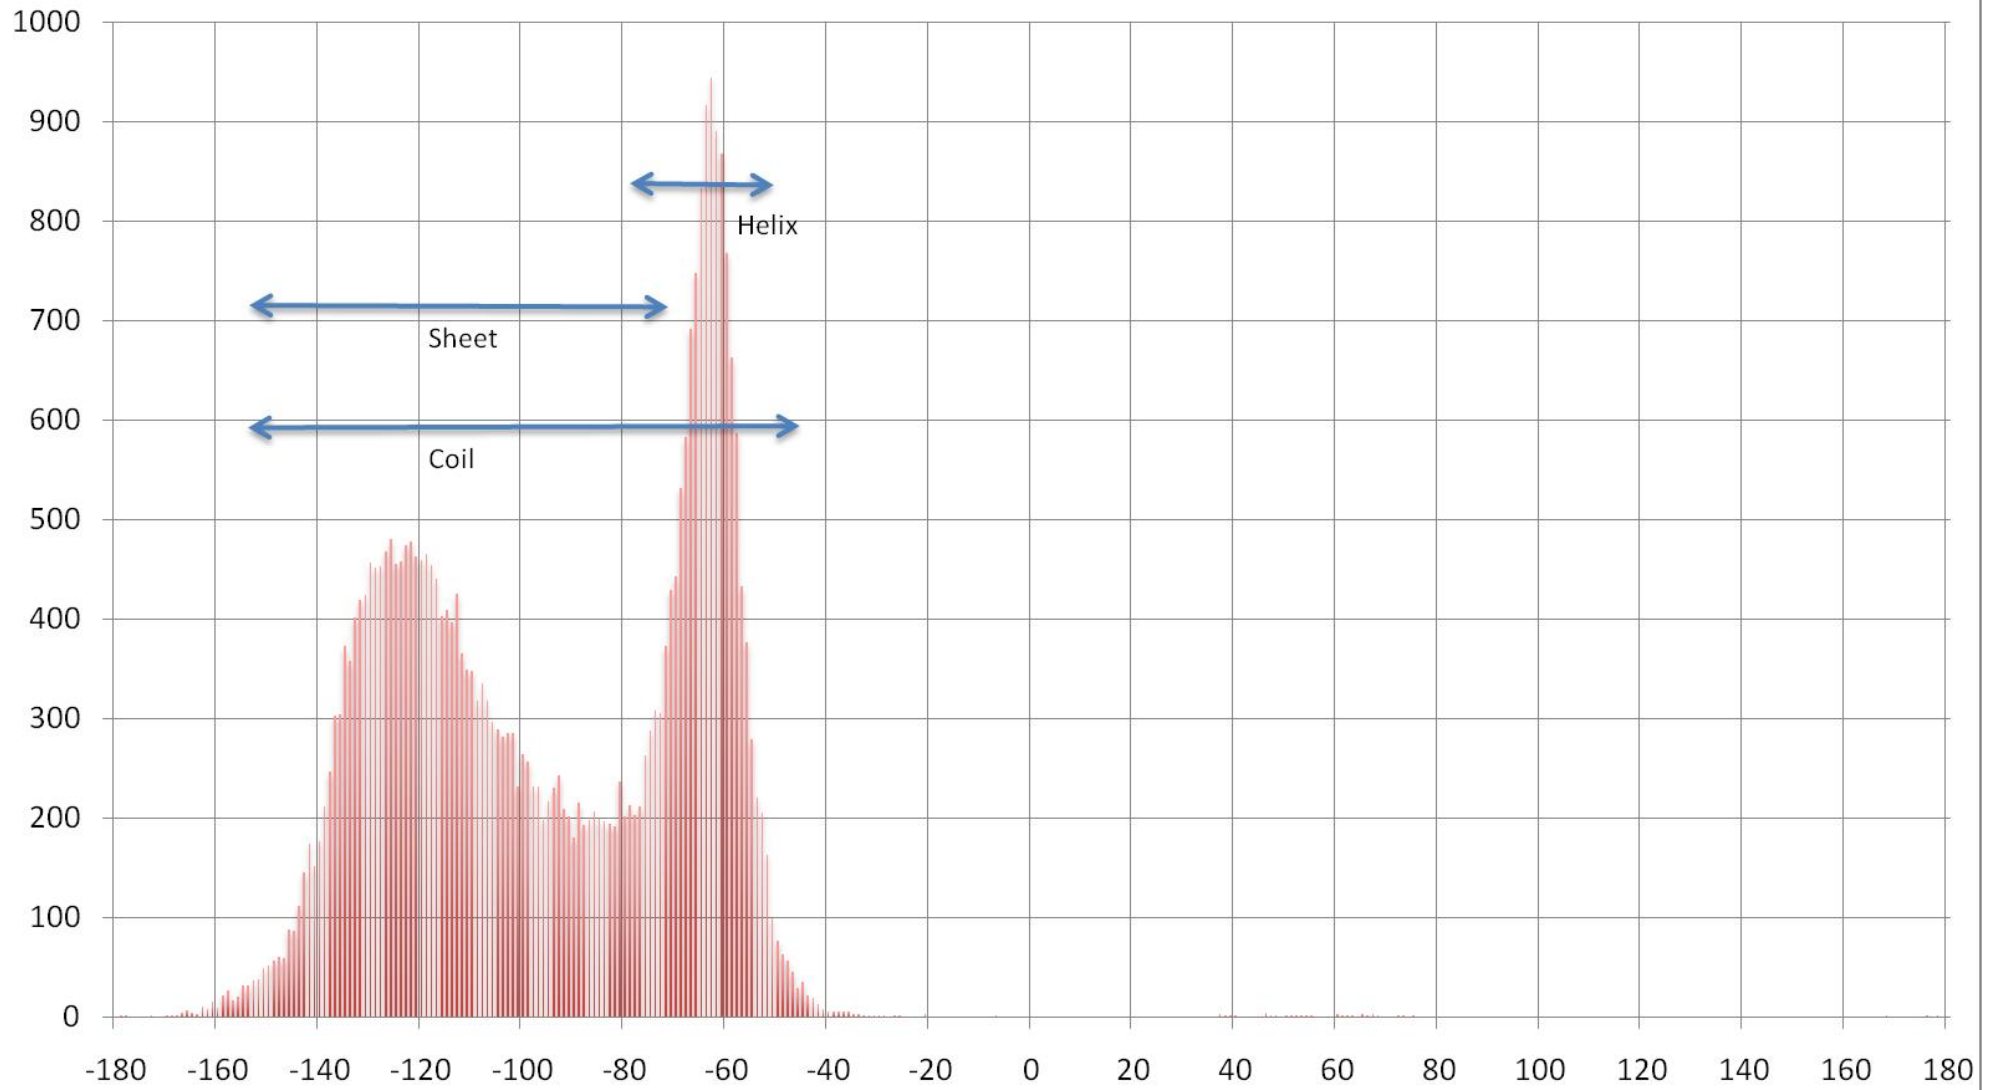

# Tryptophan

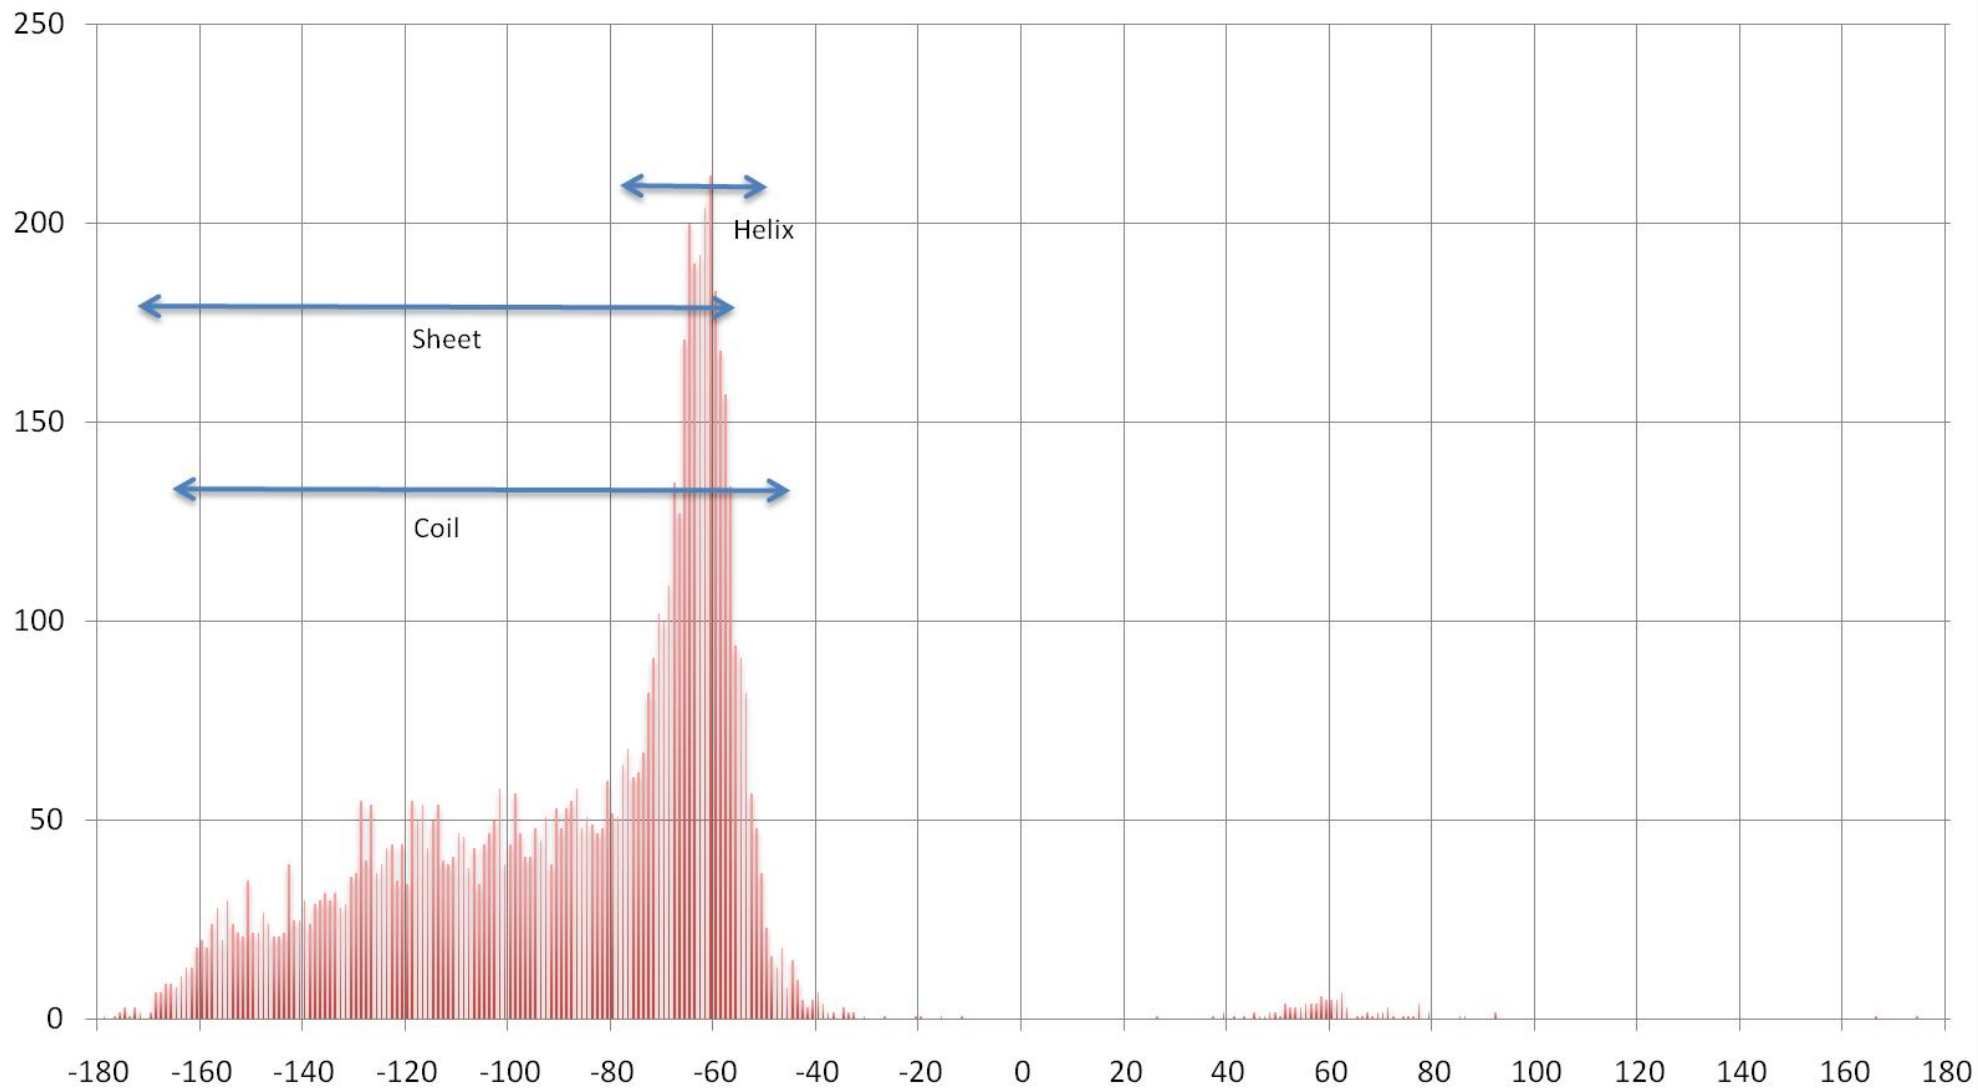

# Tyrosine

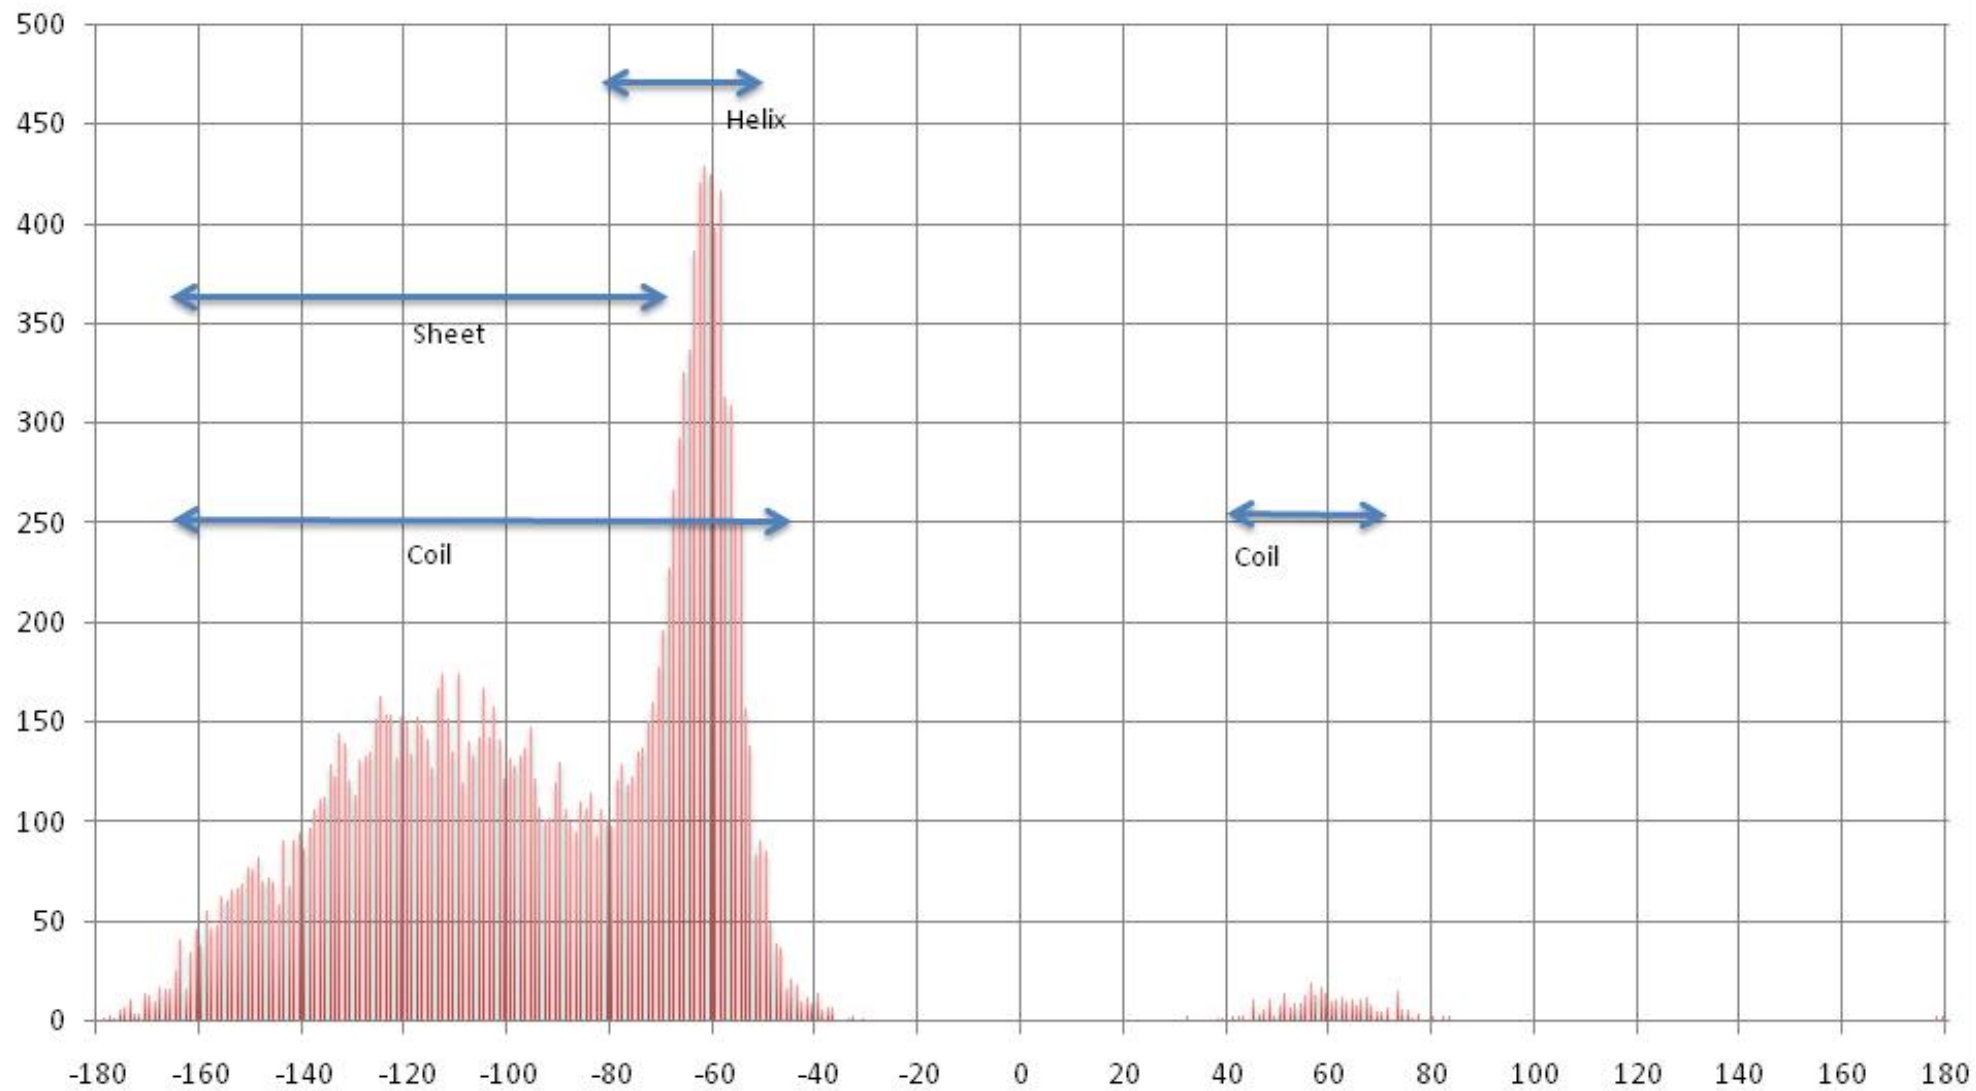

Distribution of Phi angle across 20 Amino acids

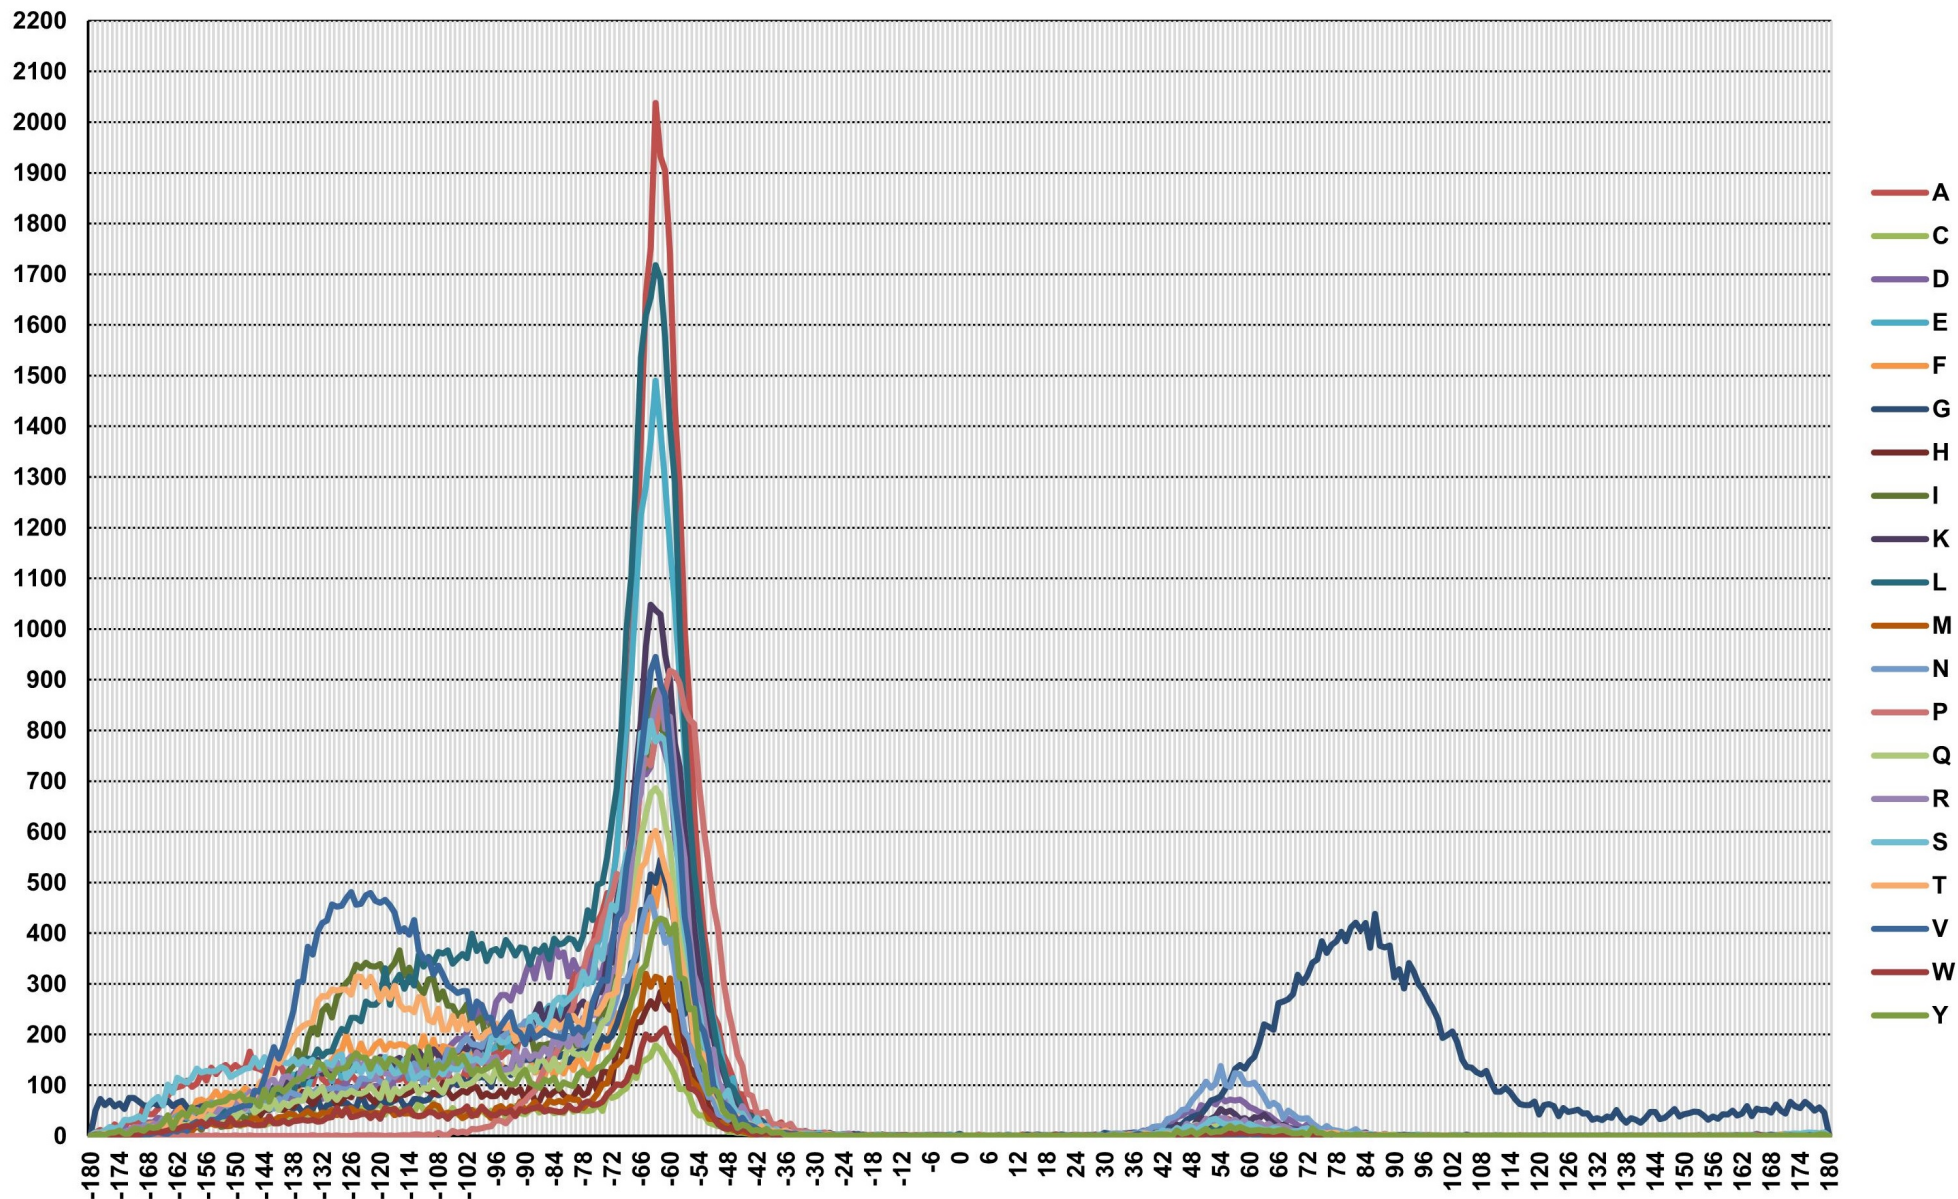

---

# Psi Angle Distribution

---

*X-axis shows angle distribution*

*Y-axis shows the number of residues*

# Alanine

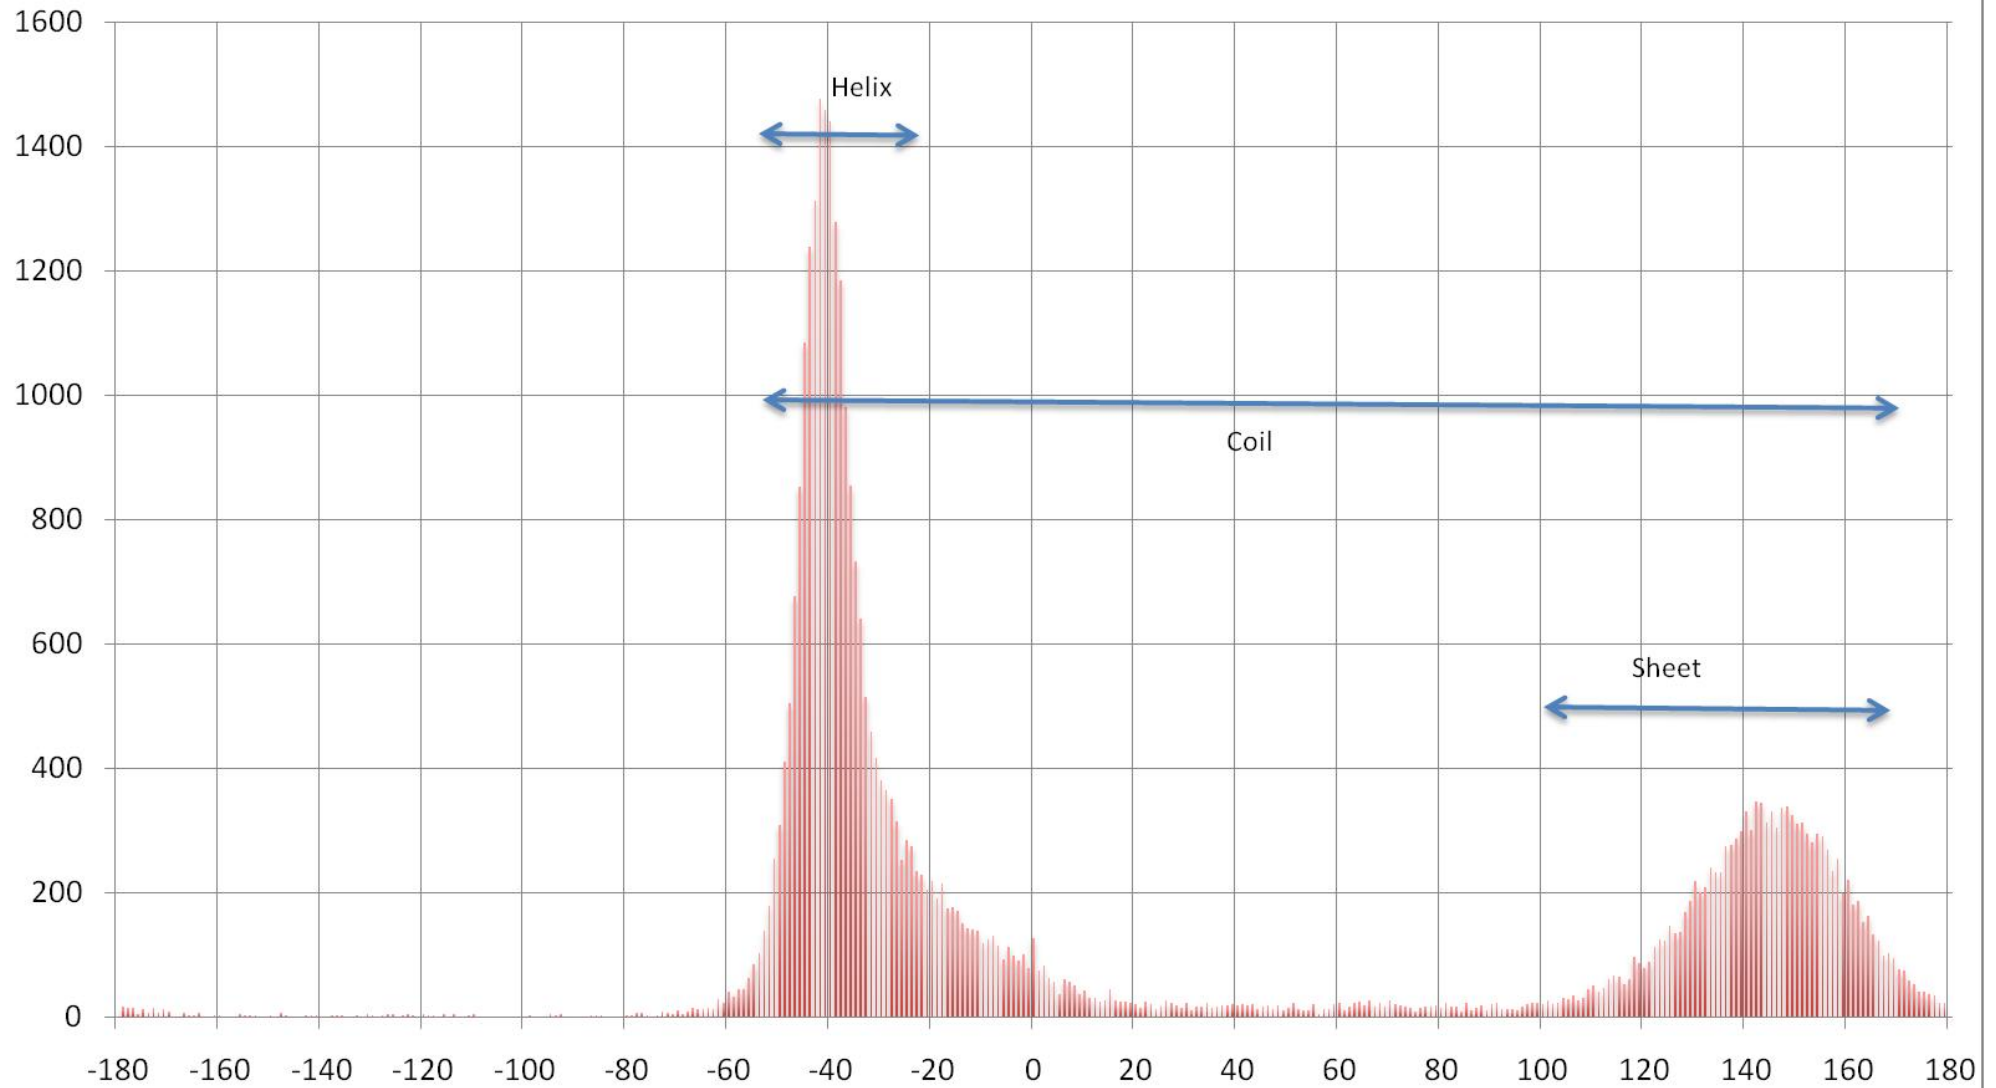



# Cysteine

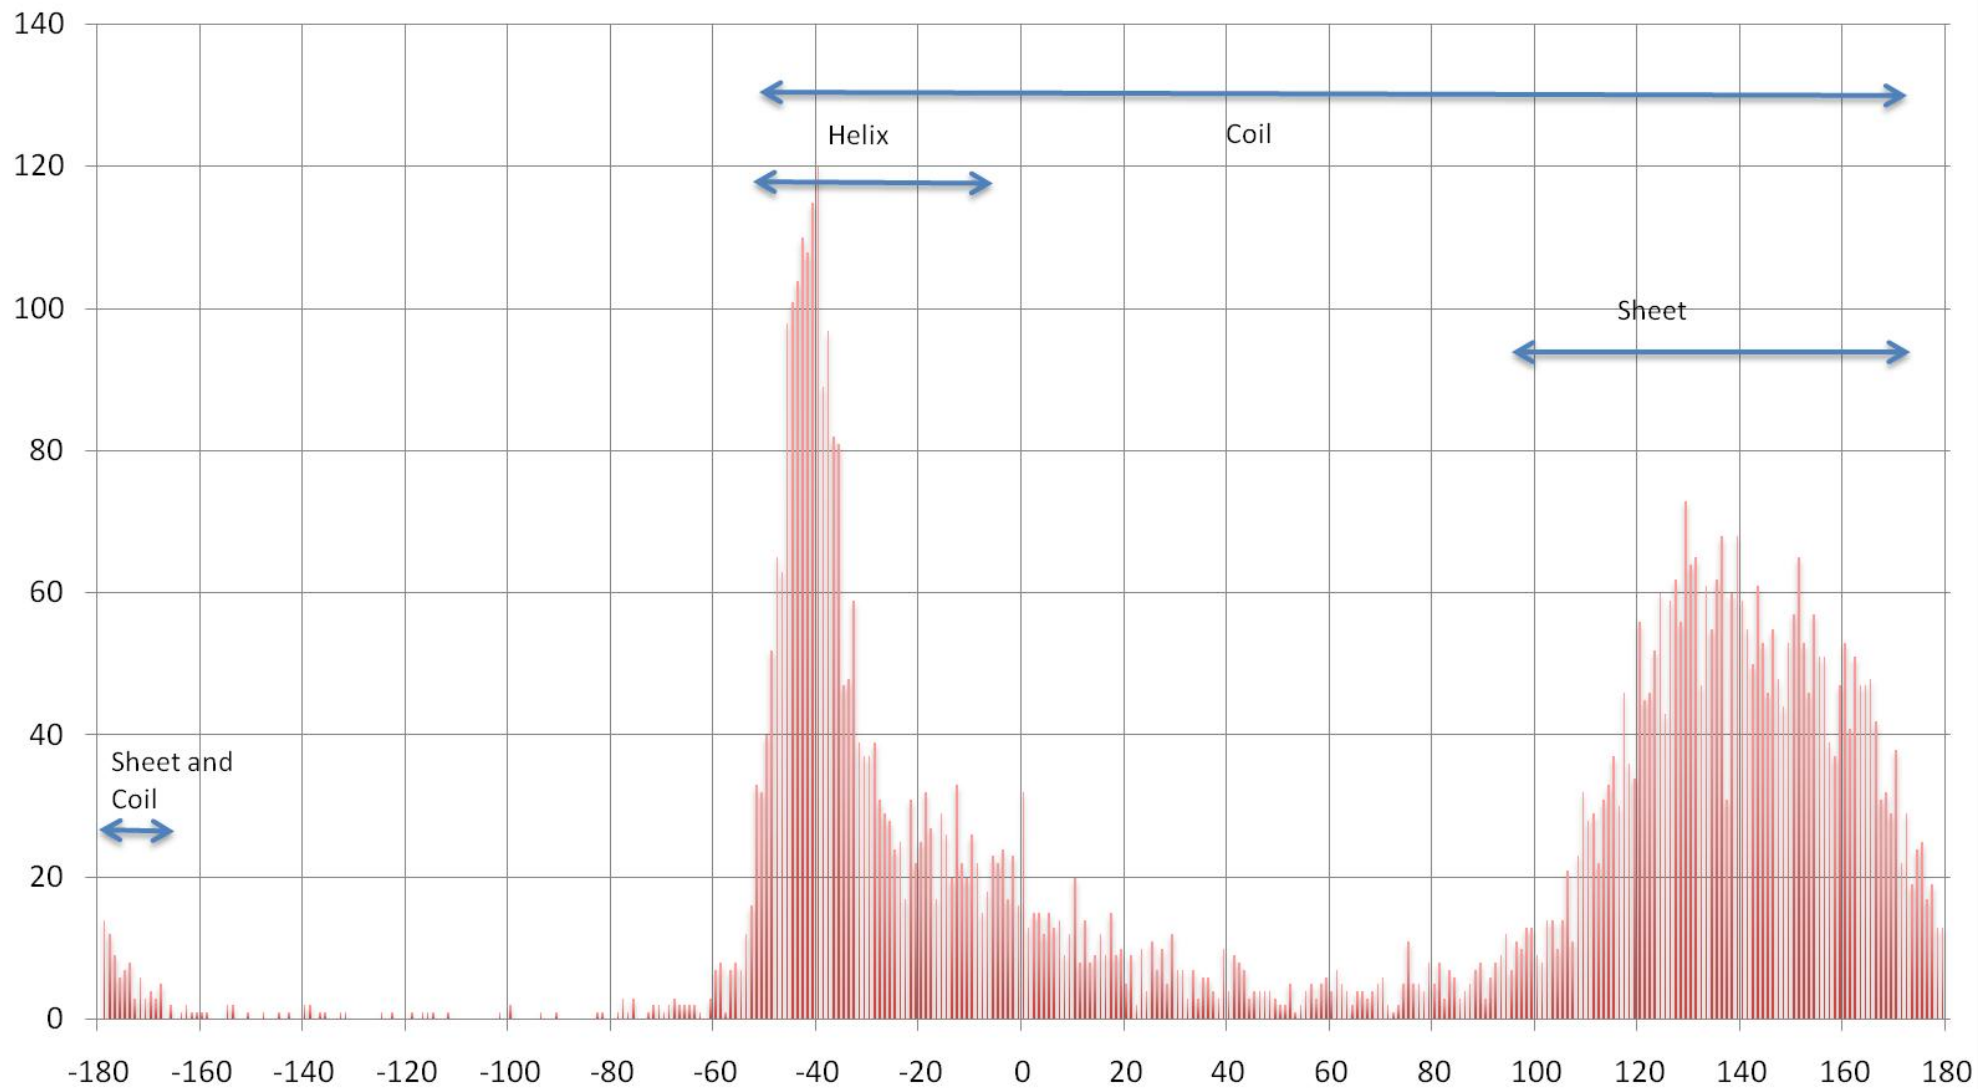

# Aspartate

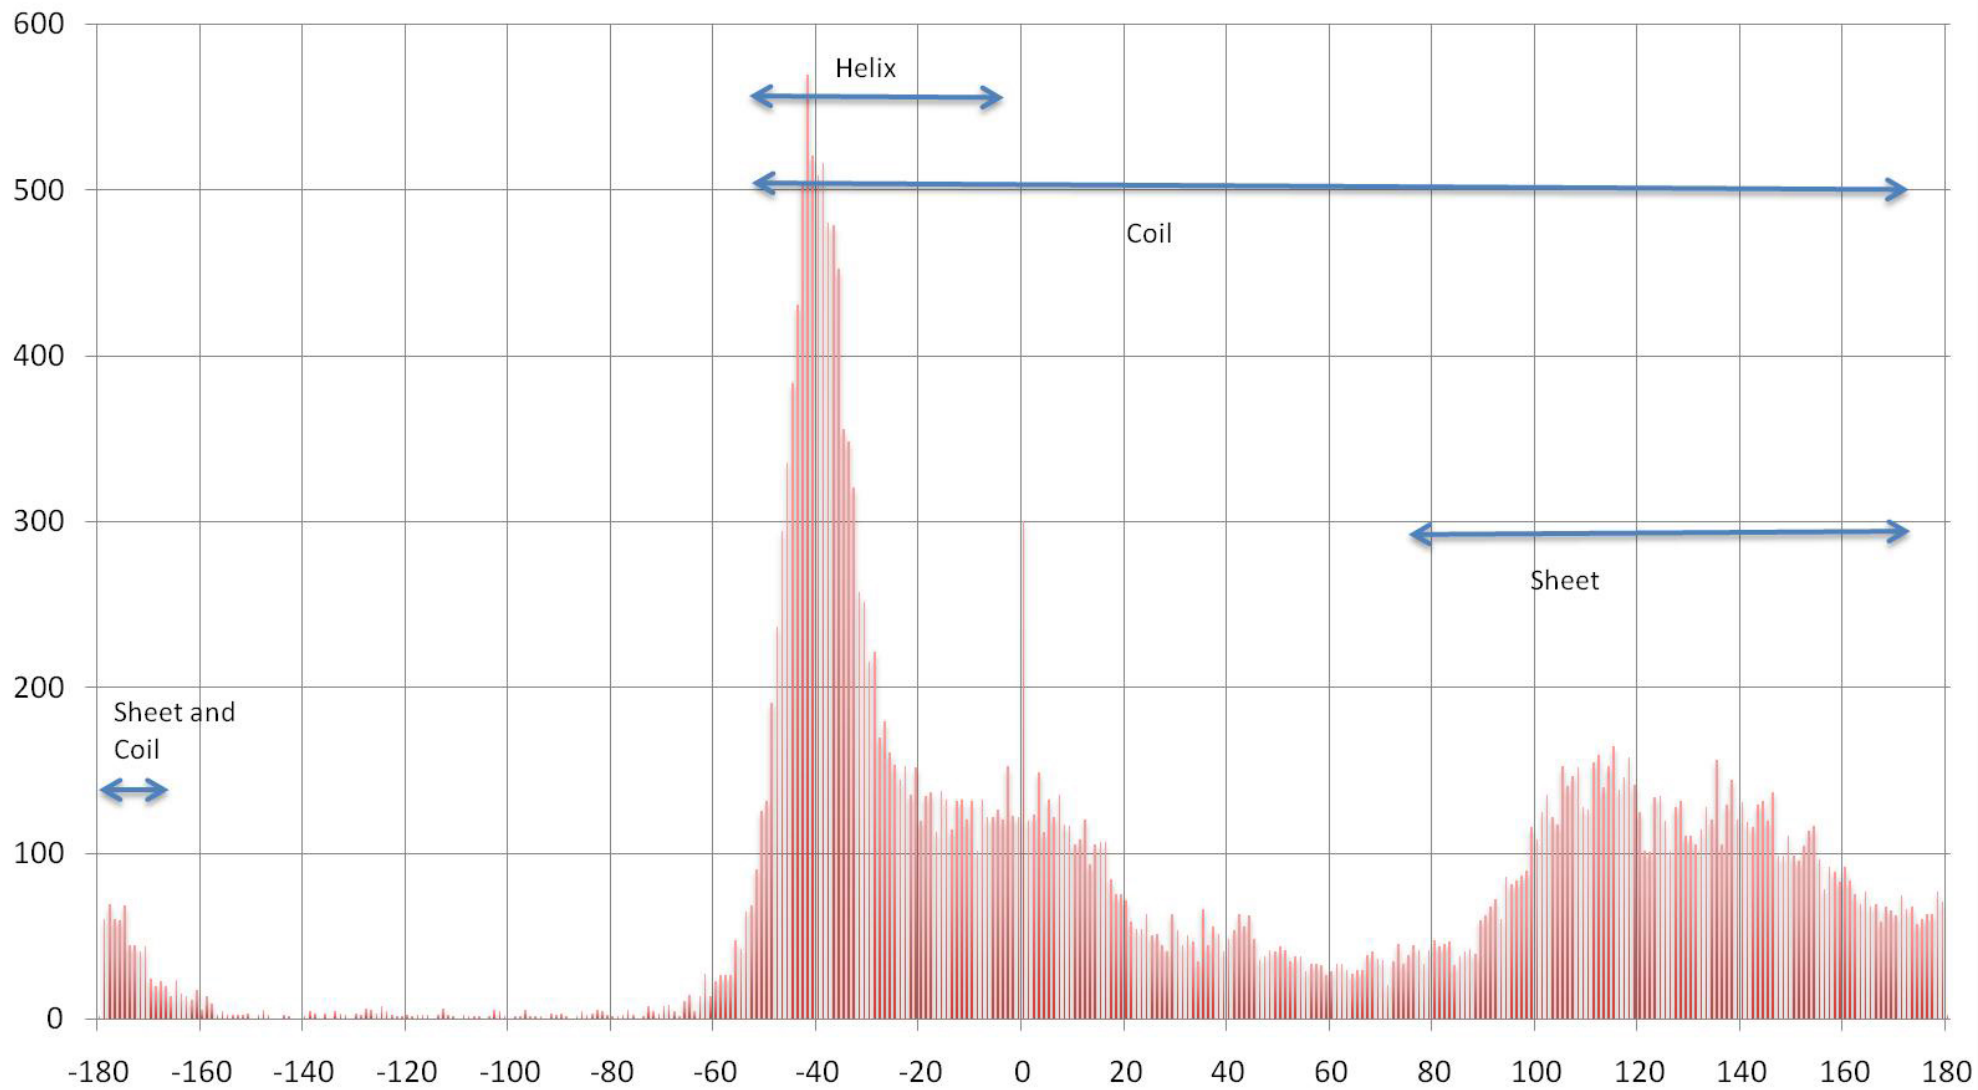

# Glutamate

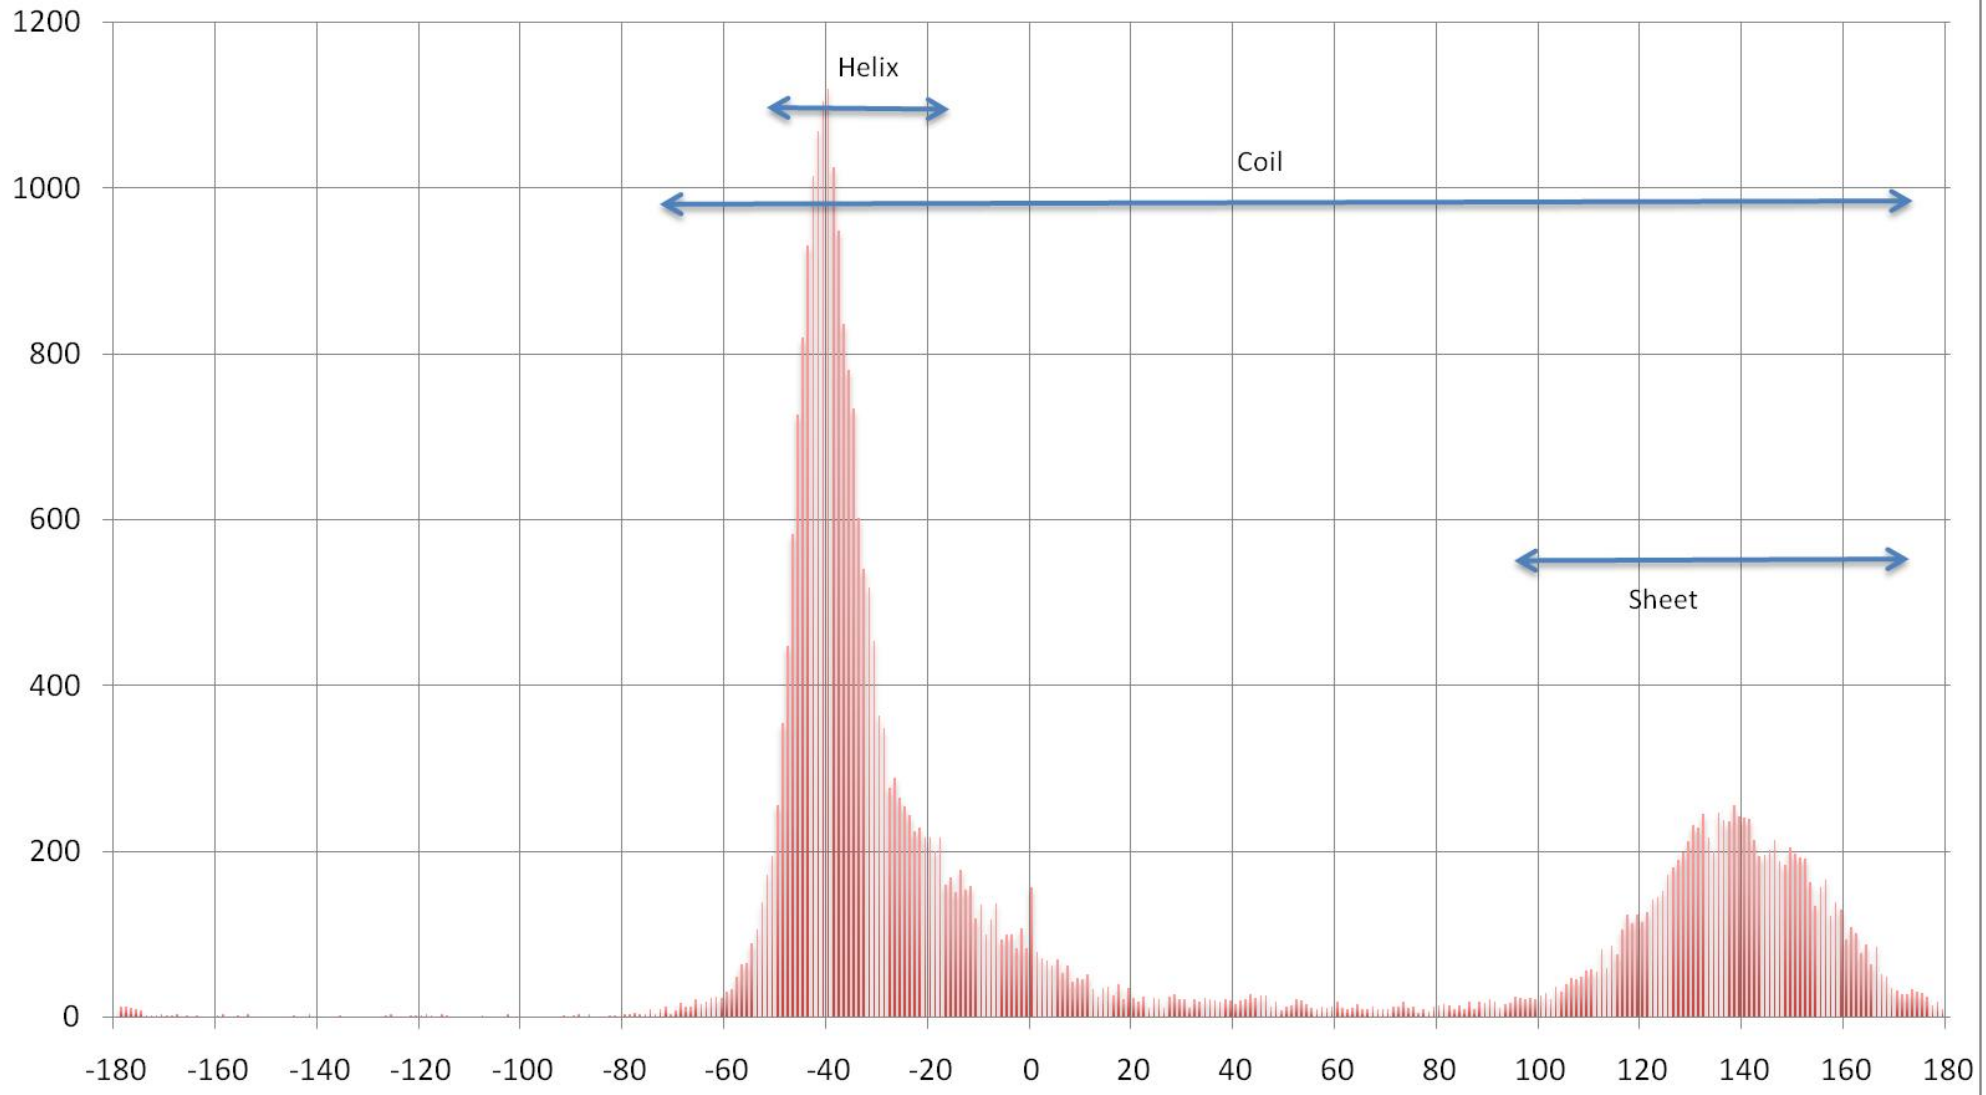

# Phenylalanine

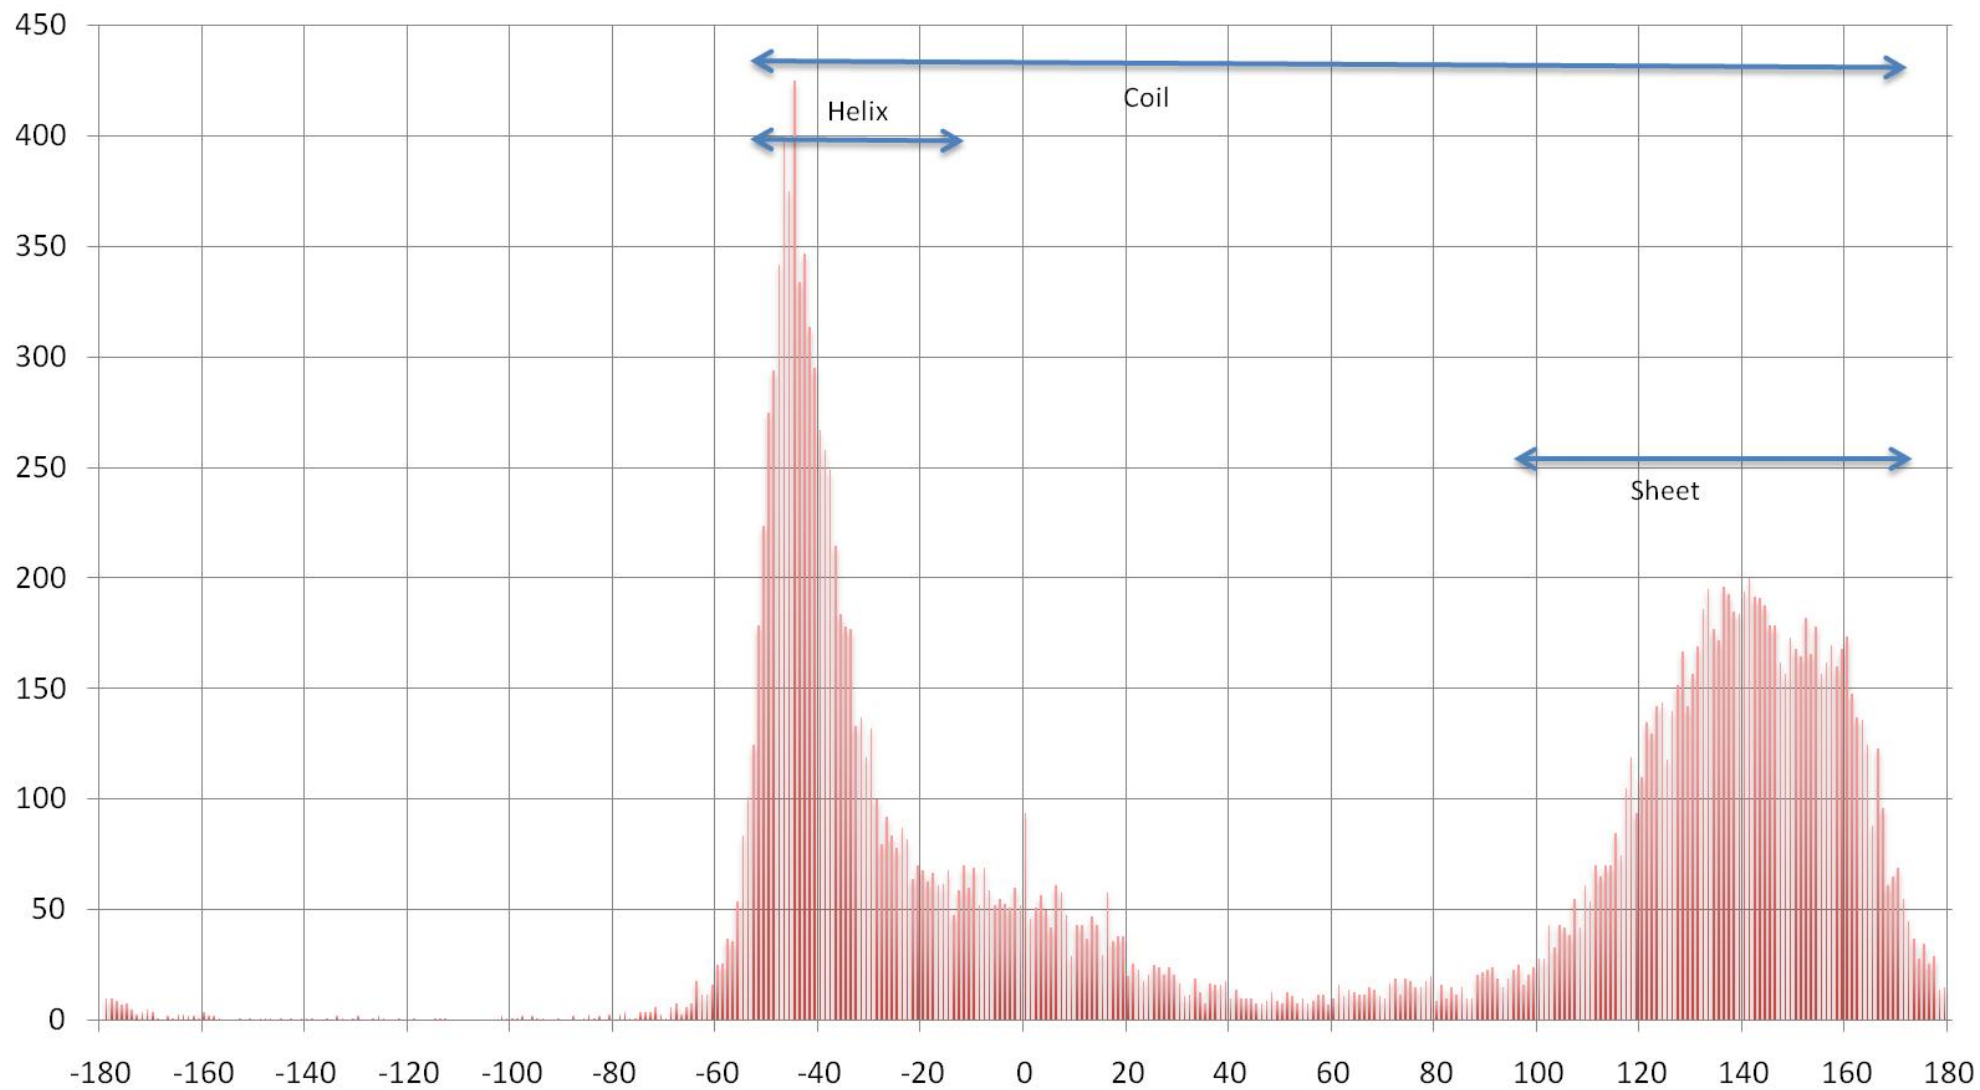

# Glycine

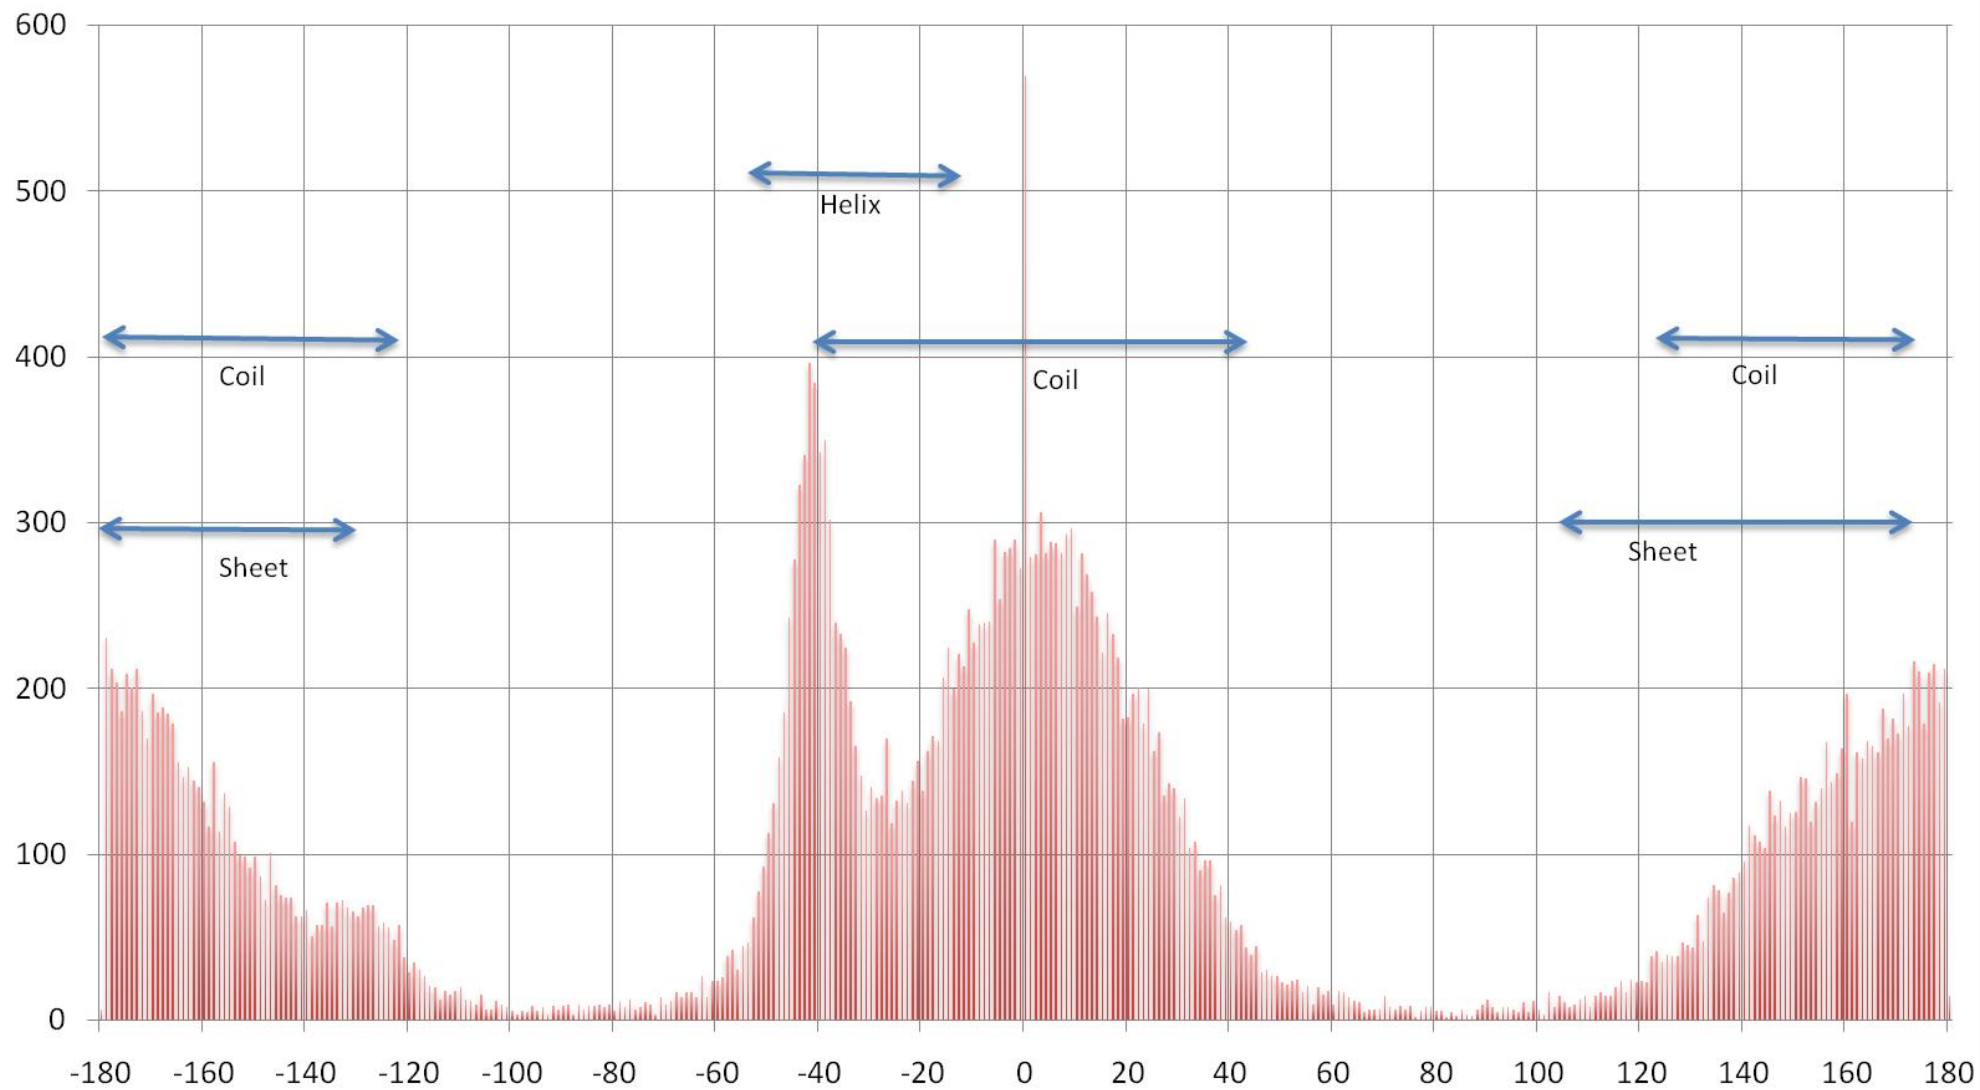

# Histidine

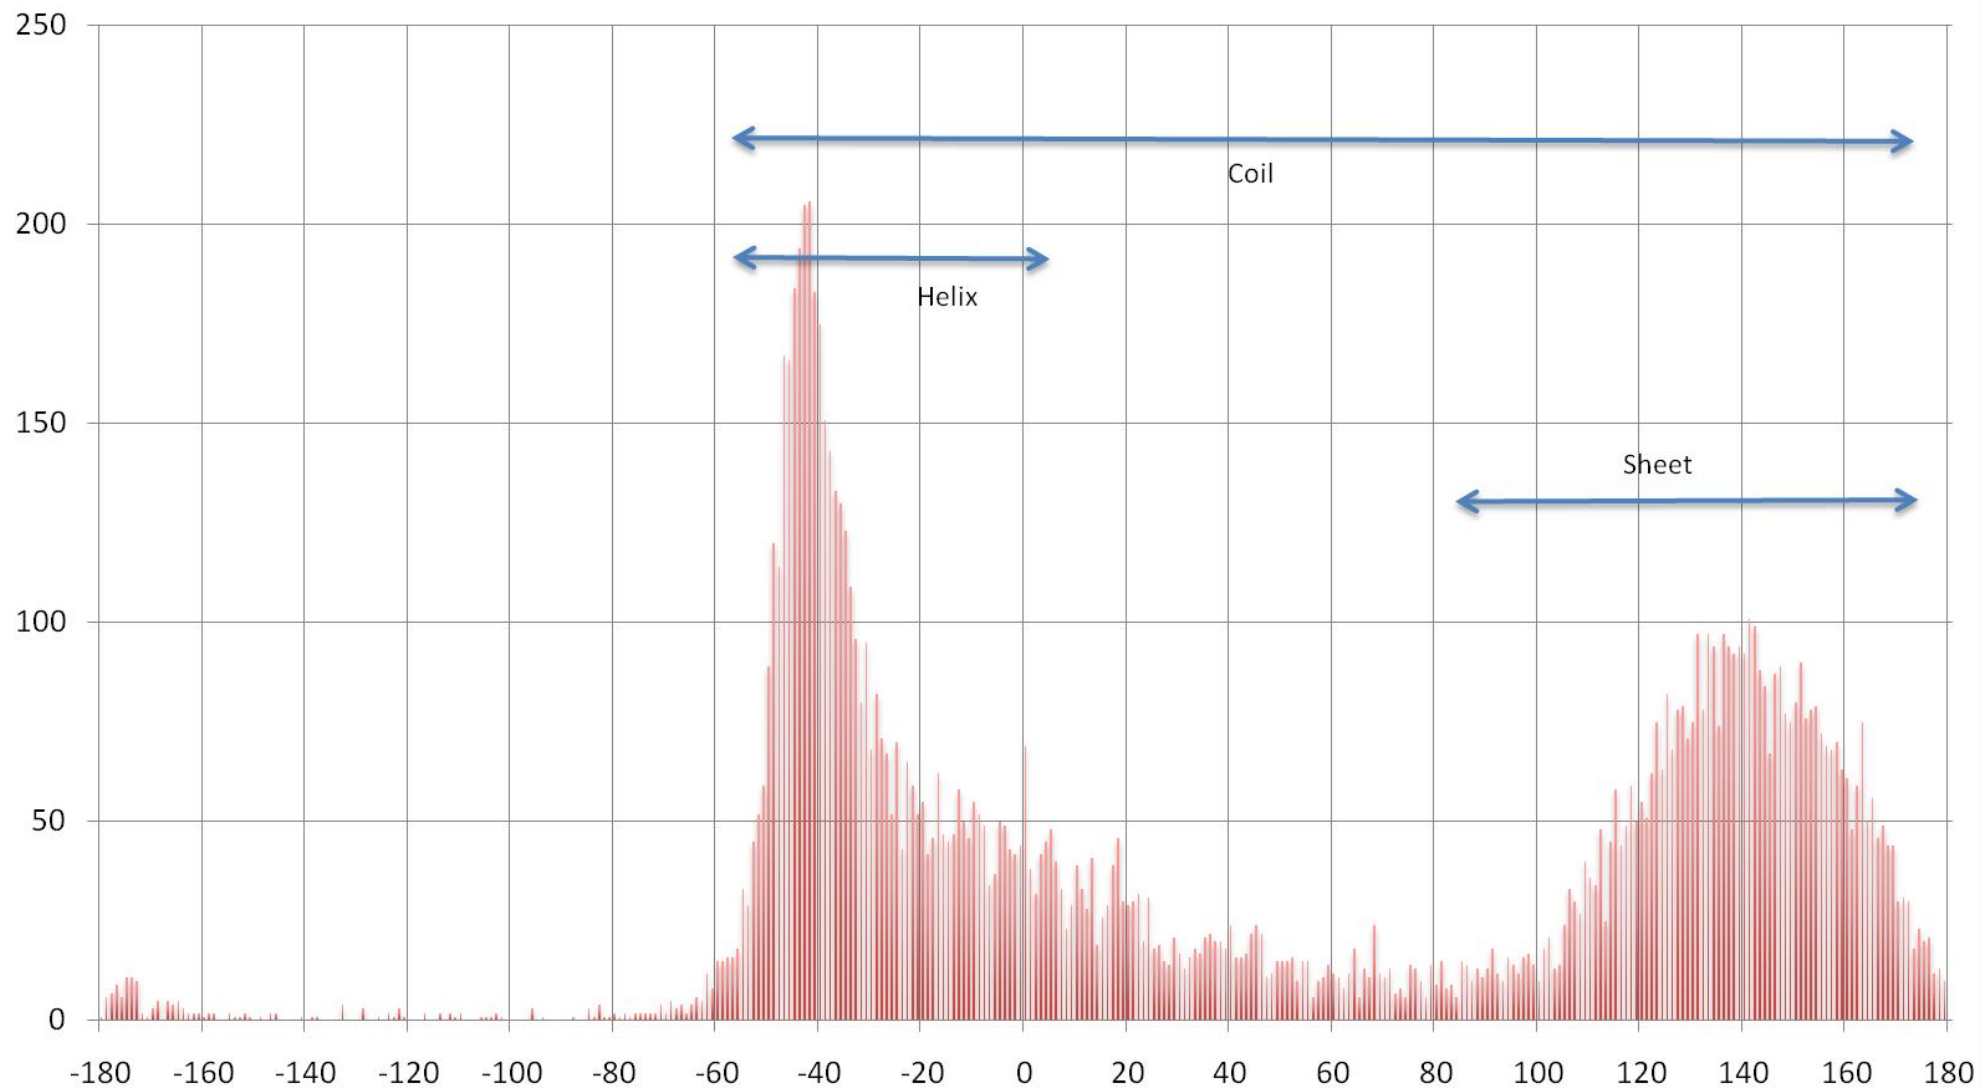

# Isoleucine

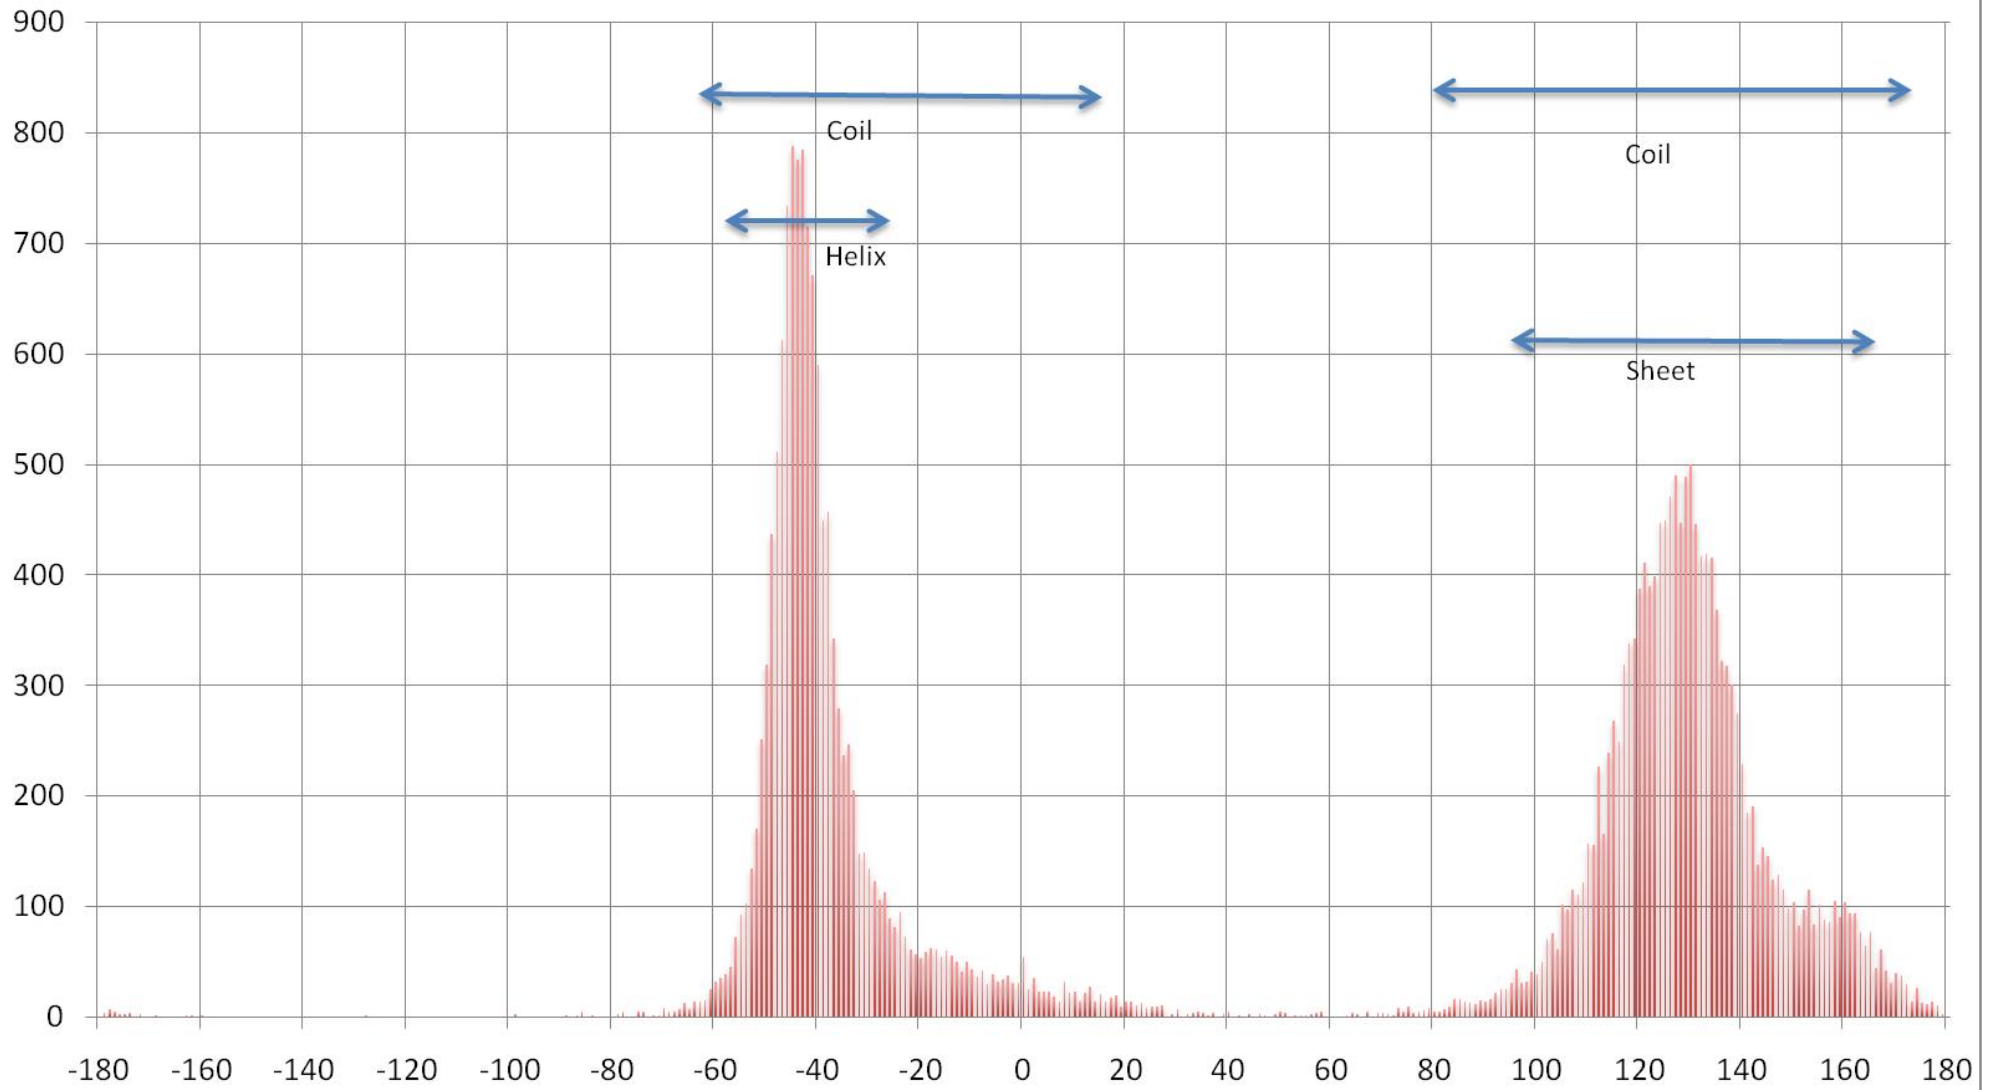

# Lysine

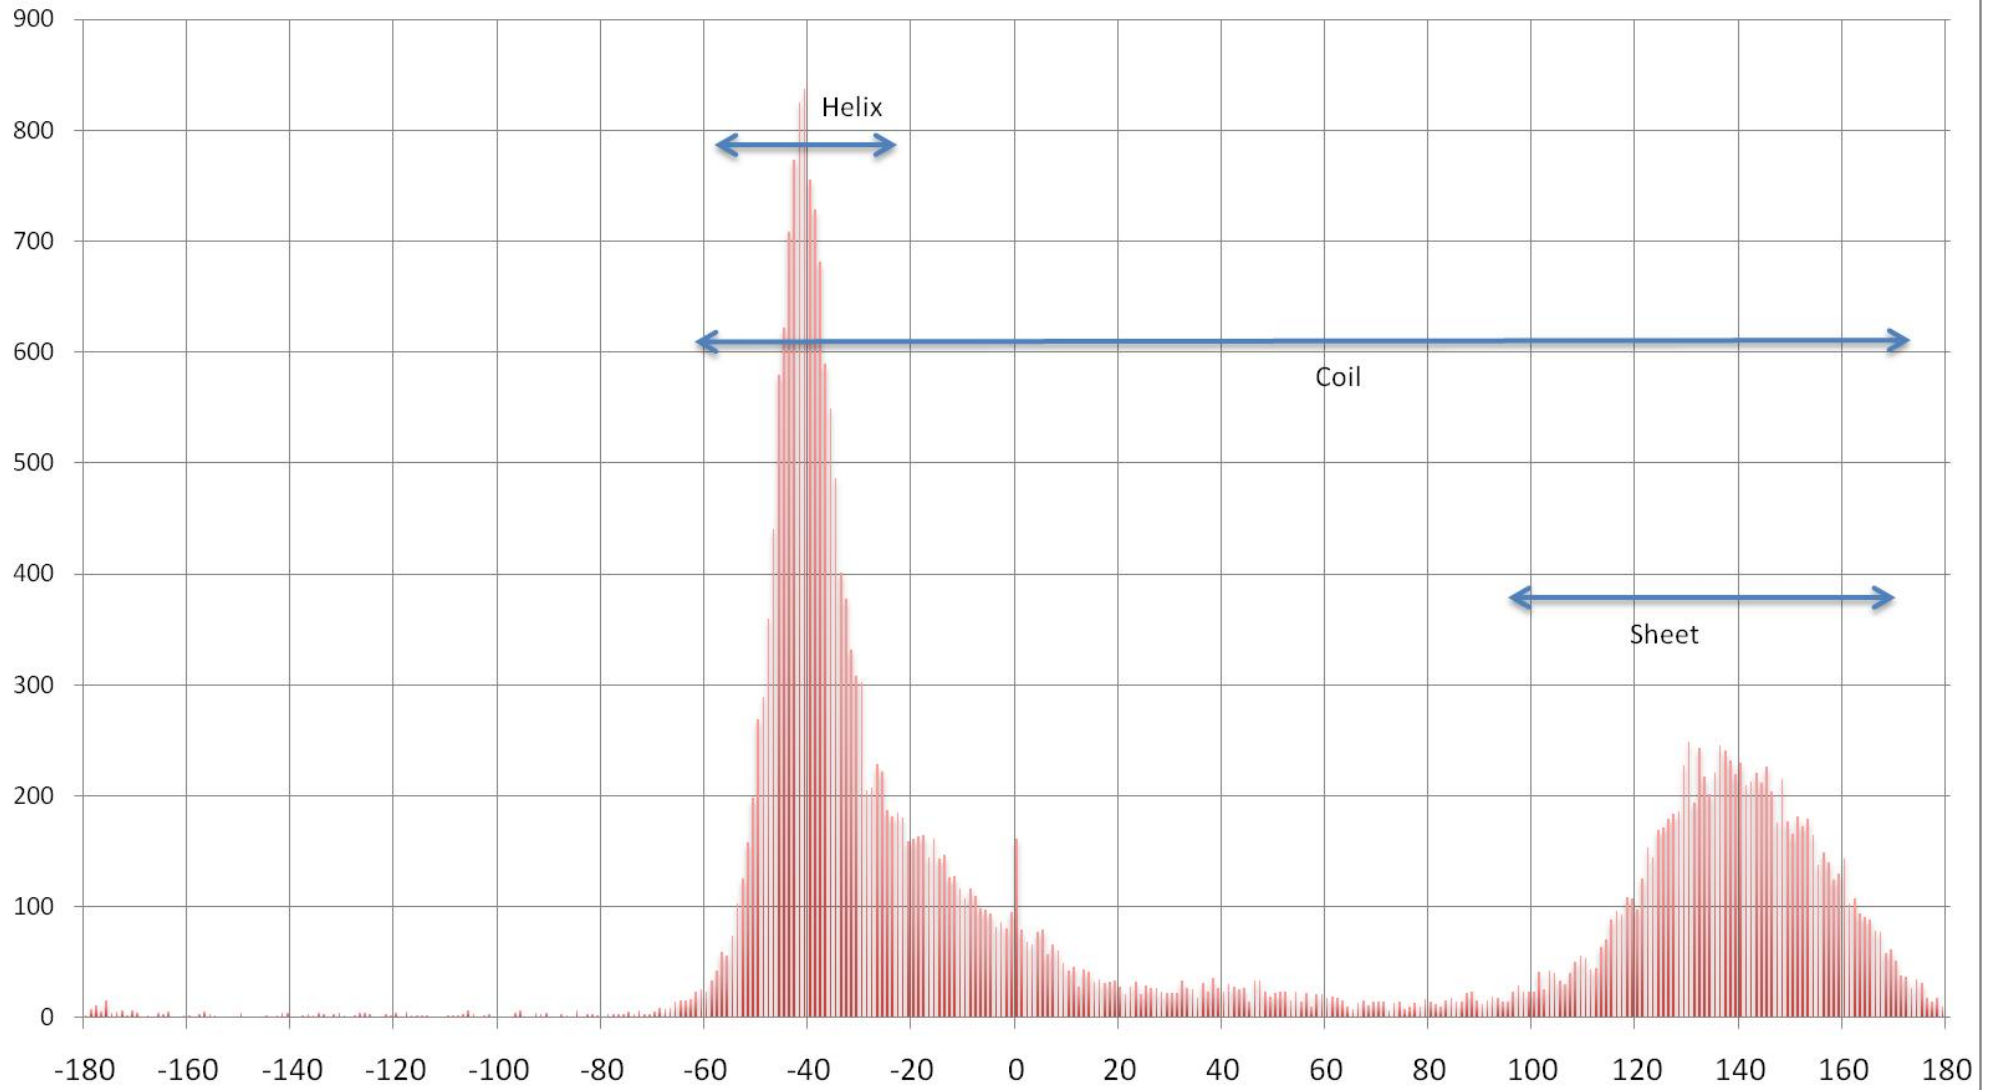



# Leucine

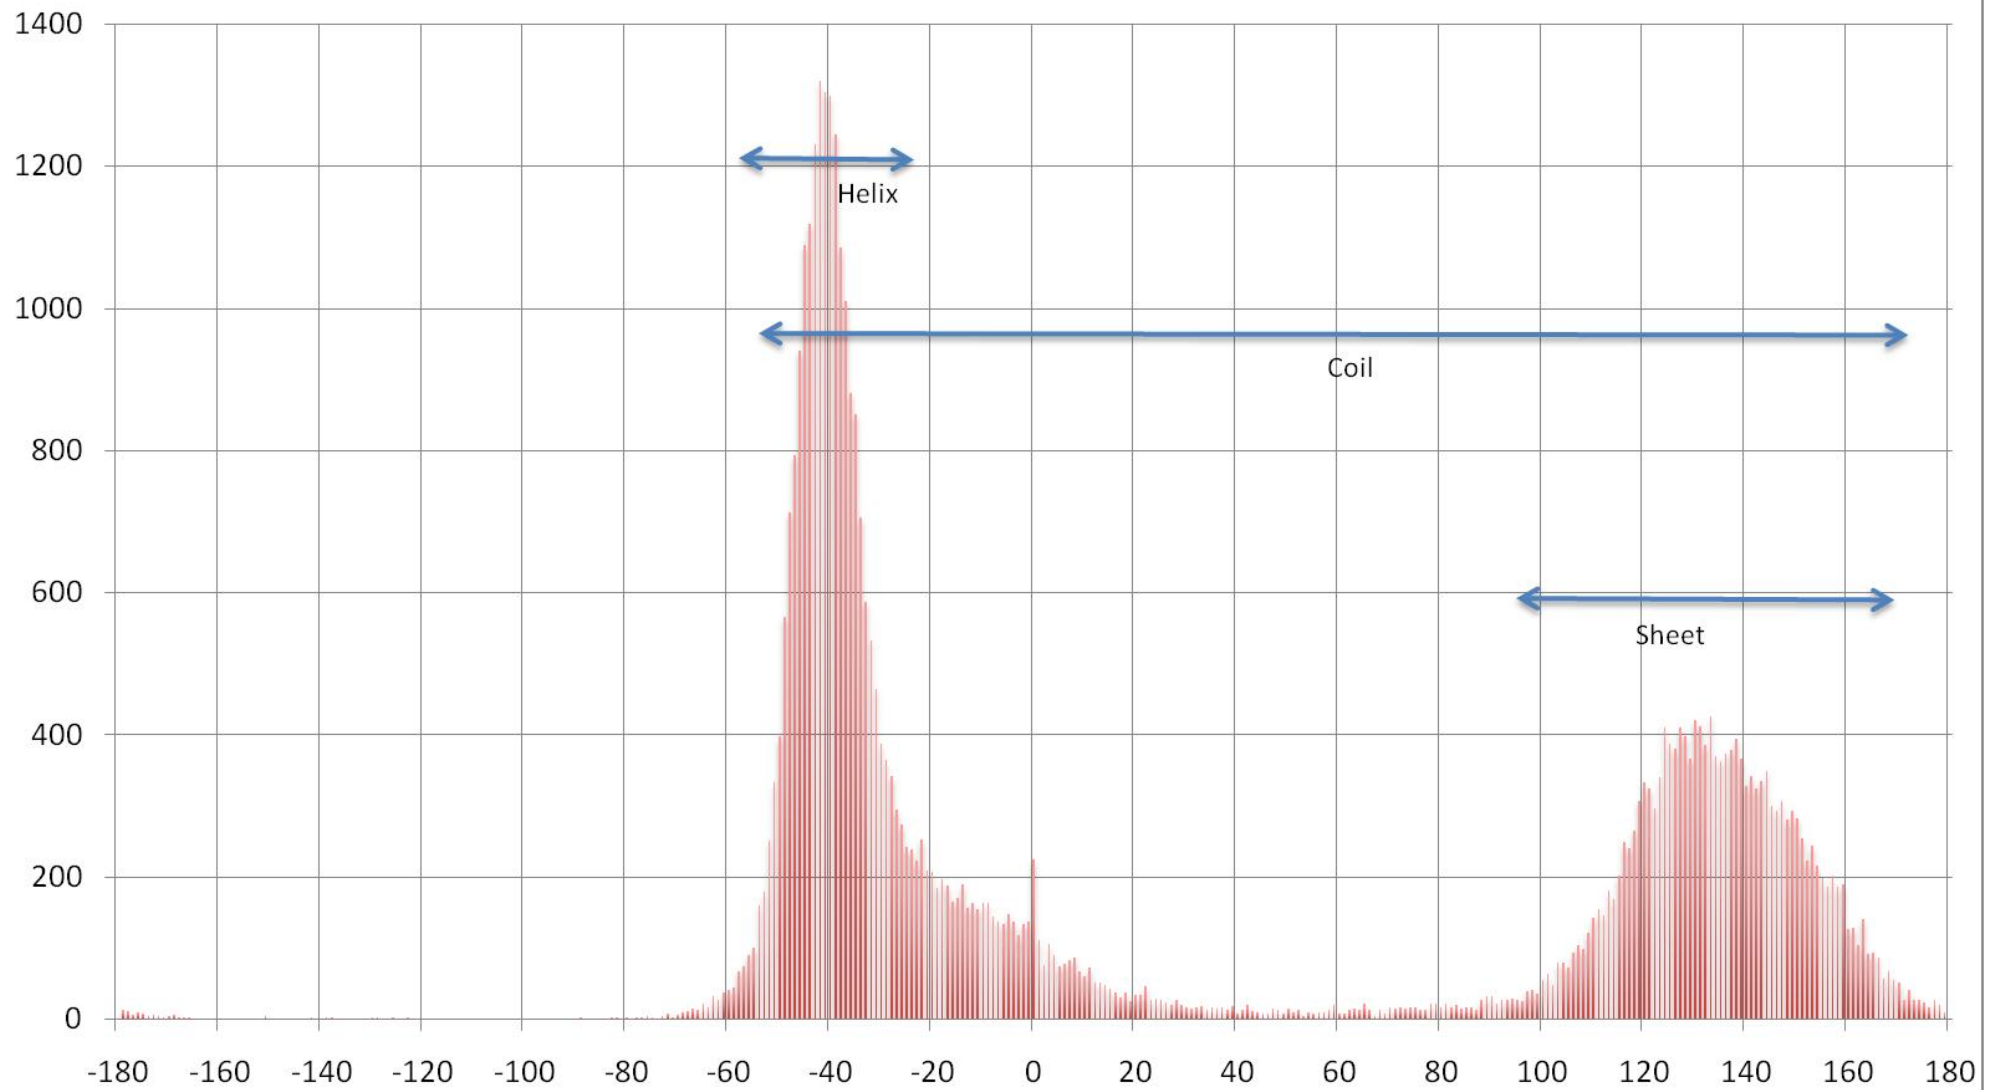

# Methionine

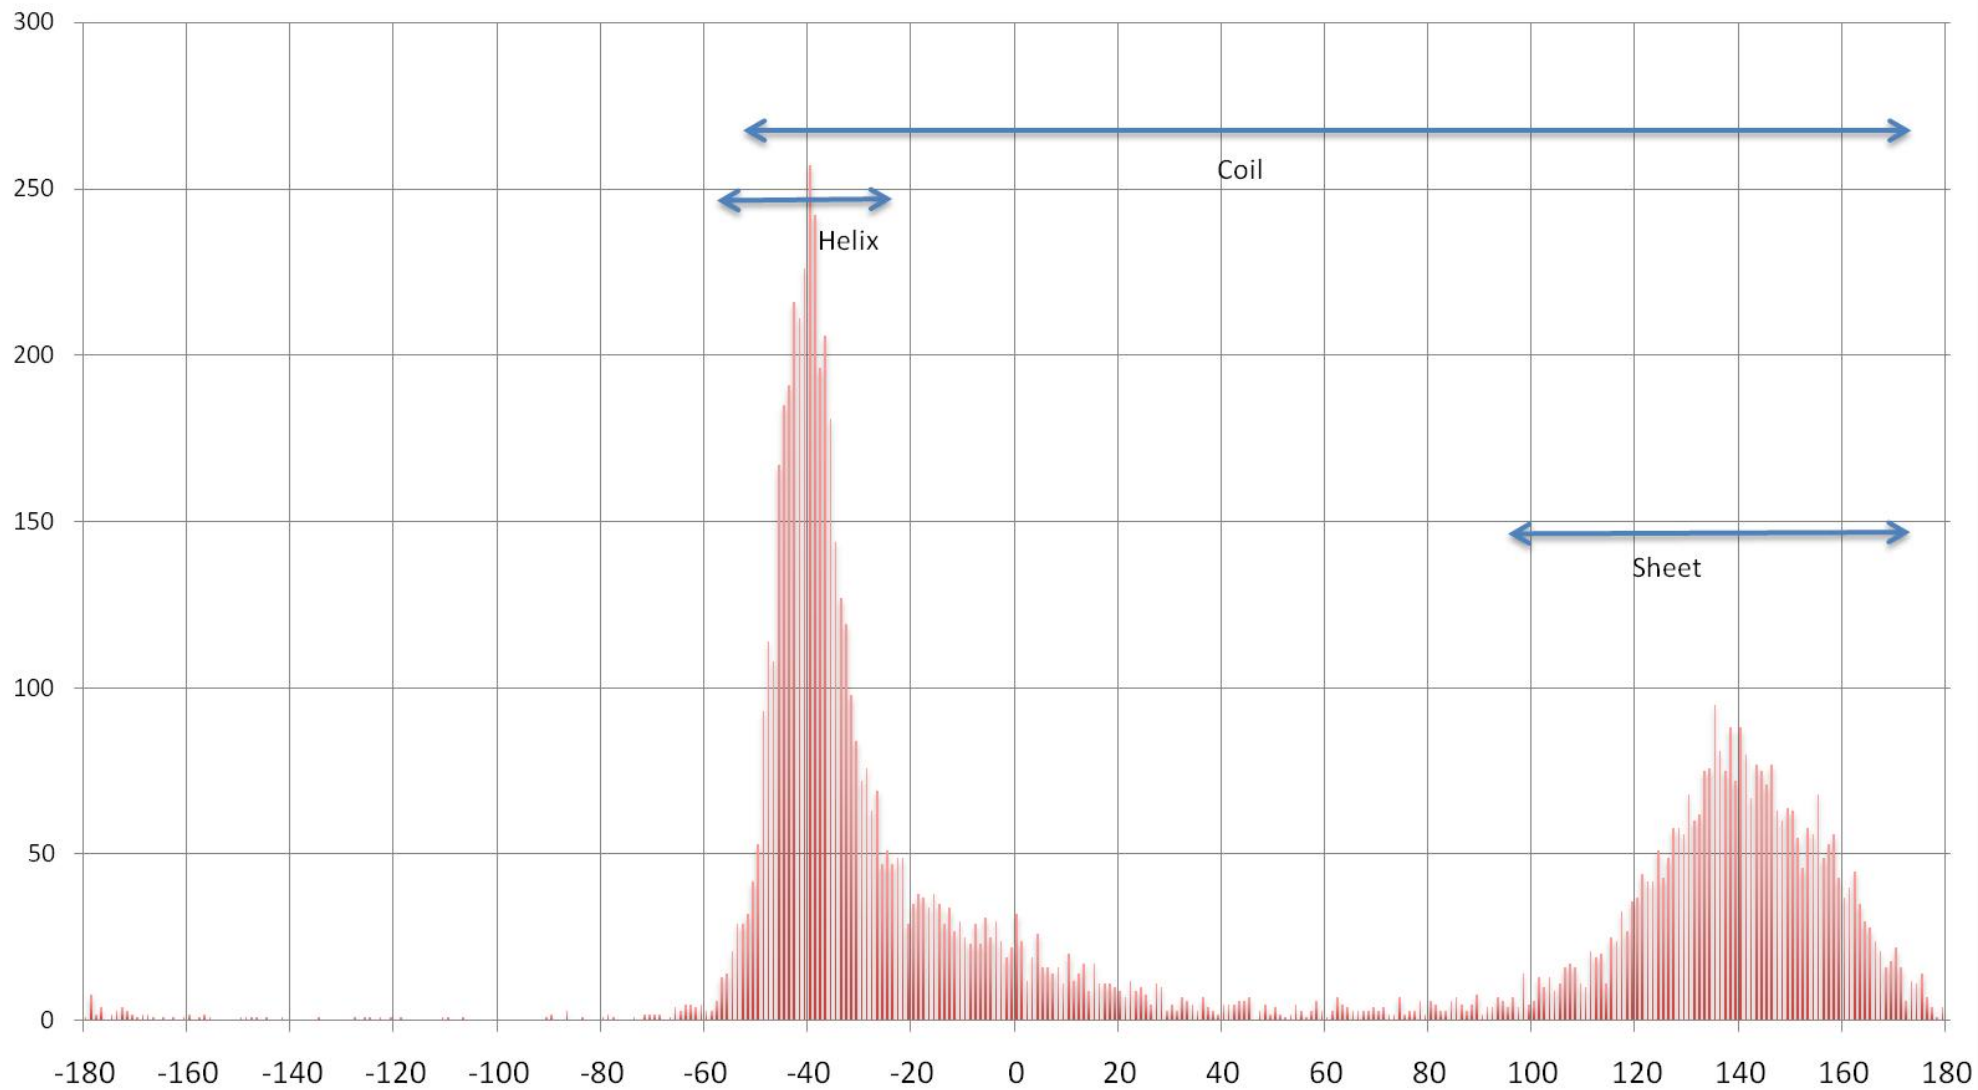

# Asparagine

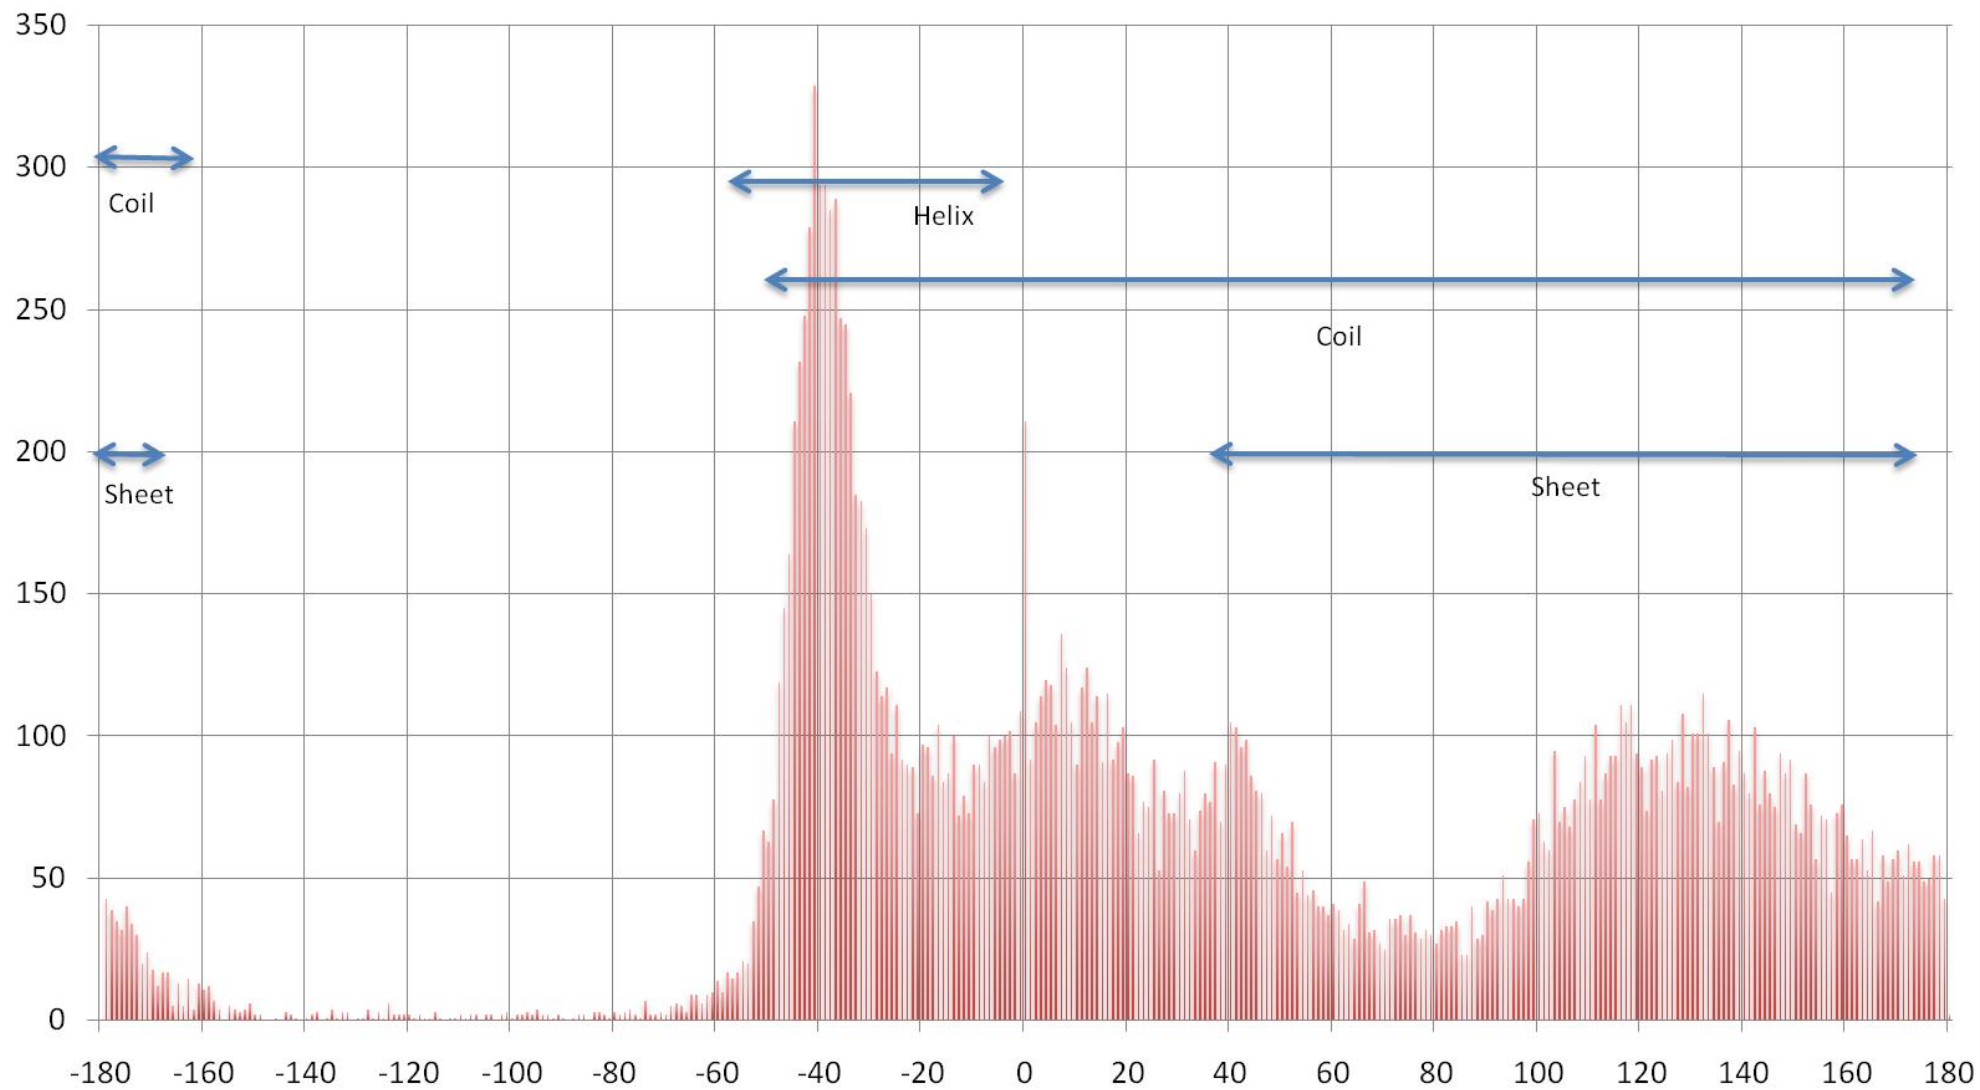

# Proline

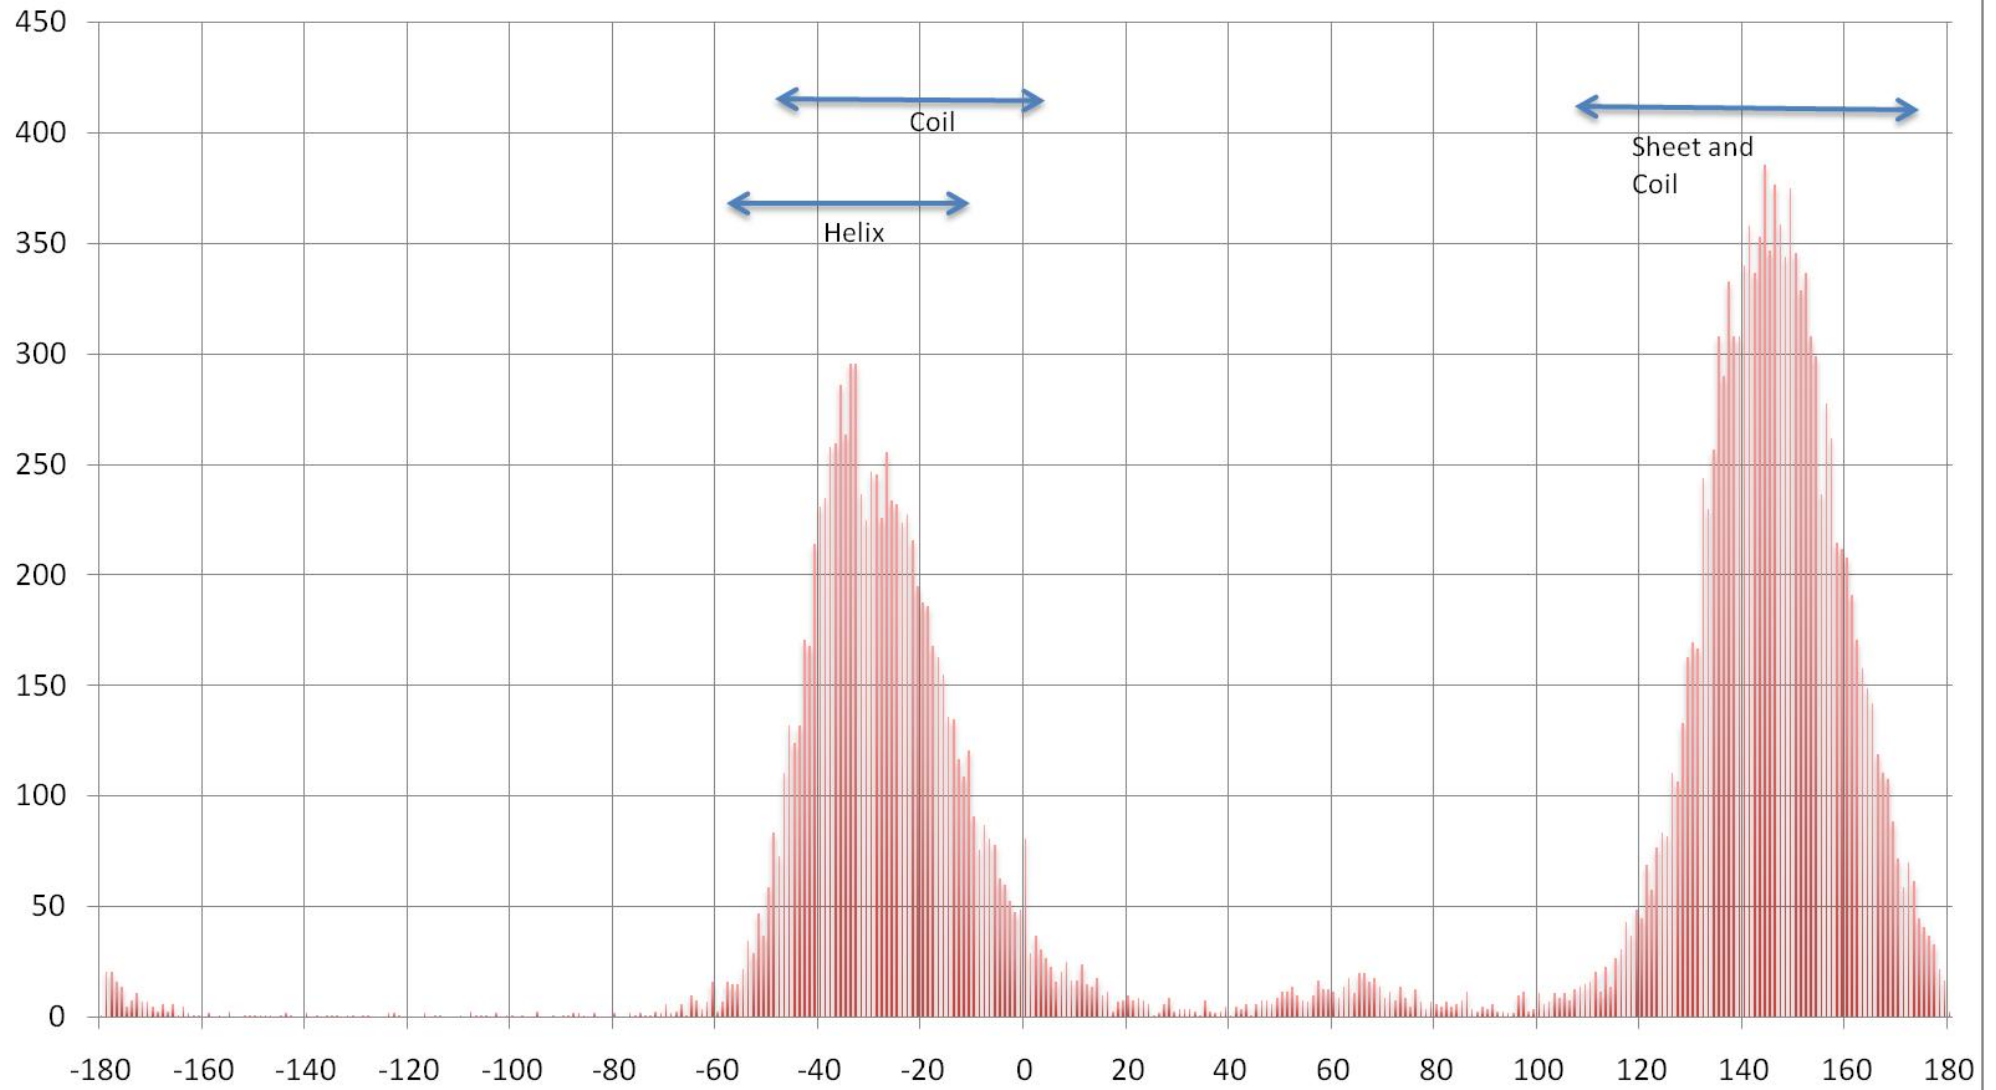

# Glutamine

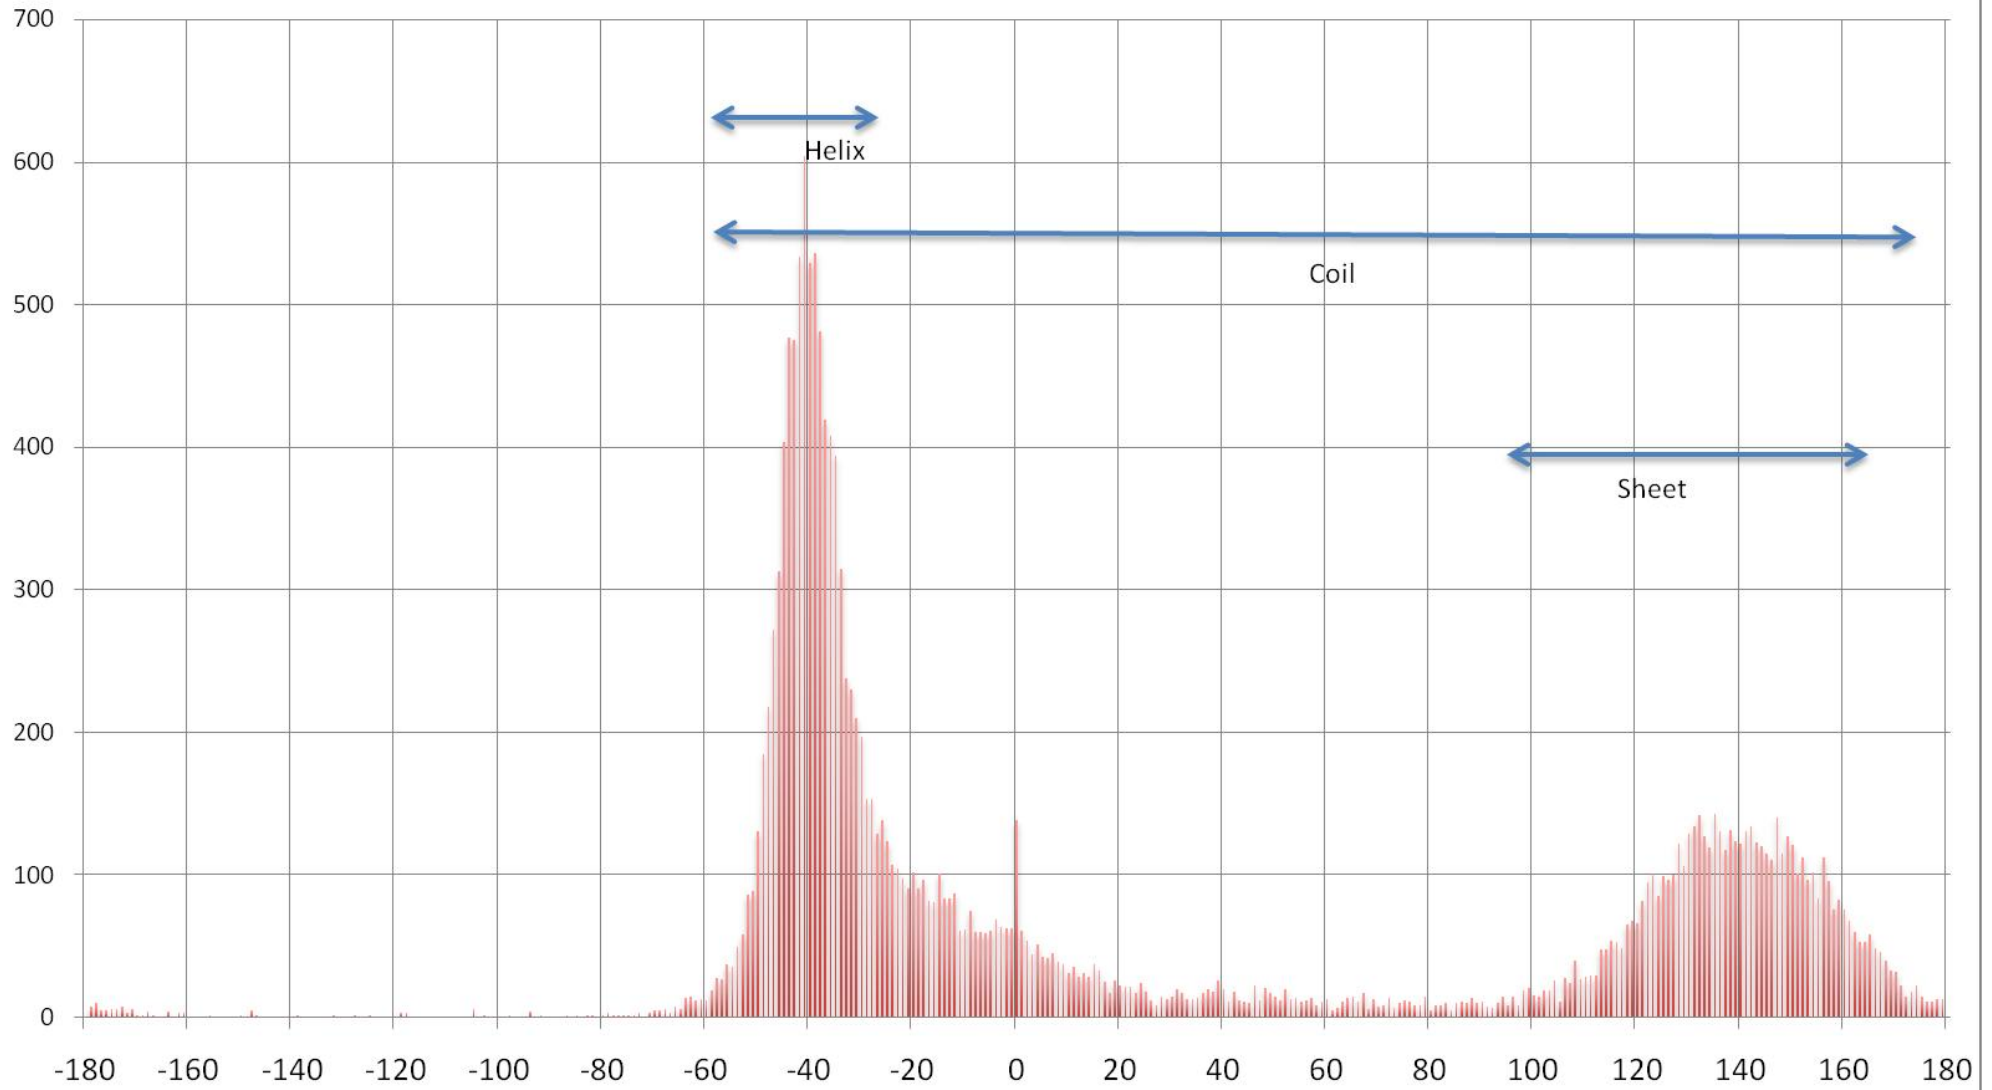

# Arginine

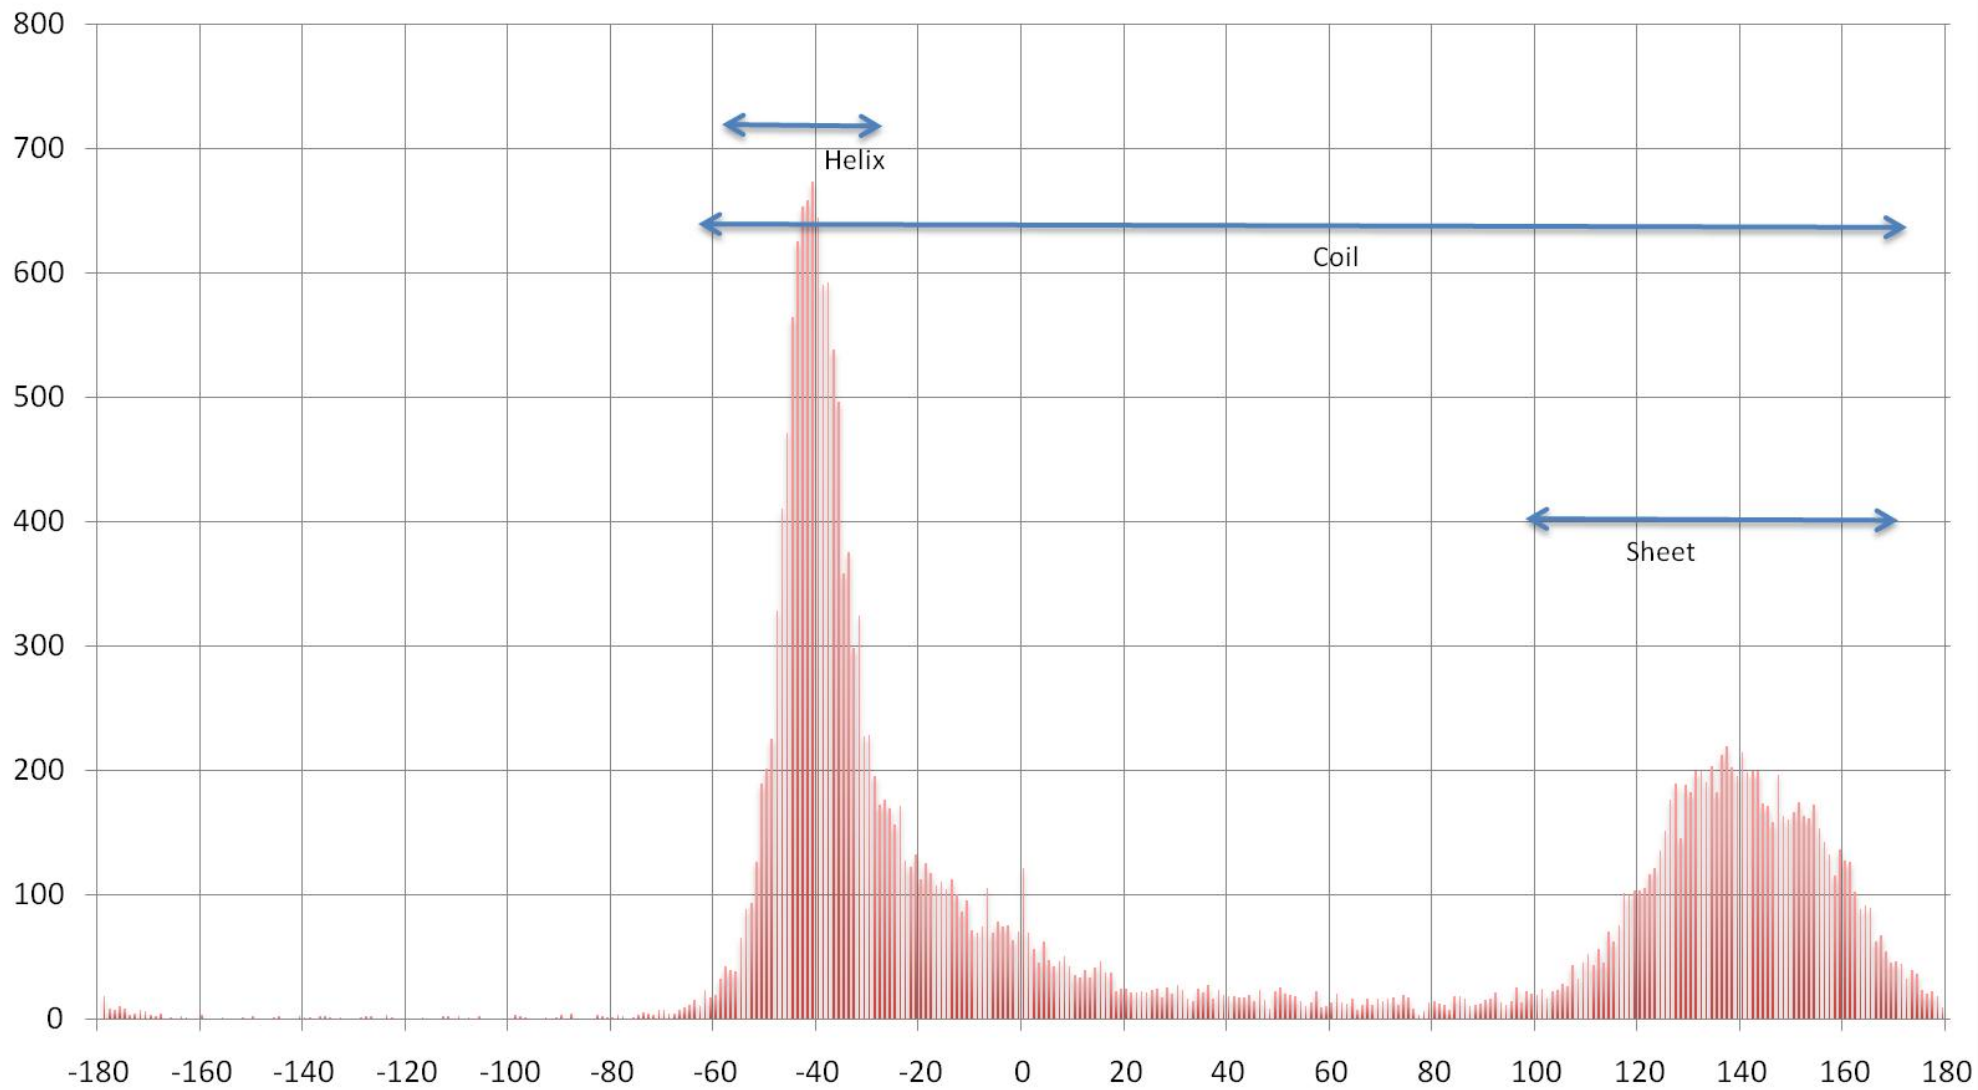

# Serine

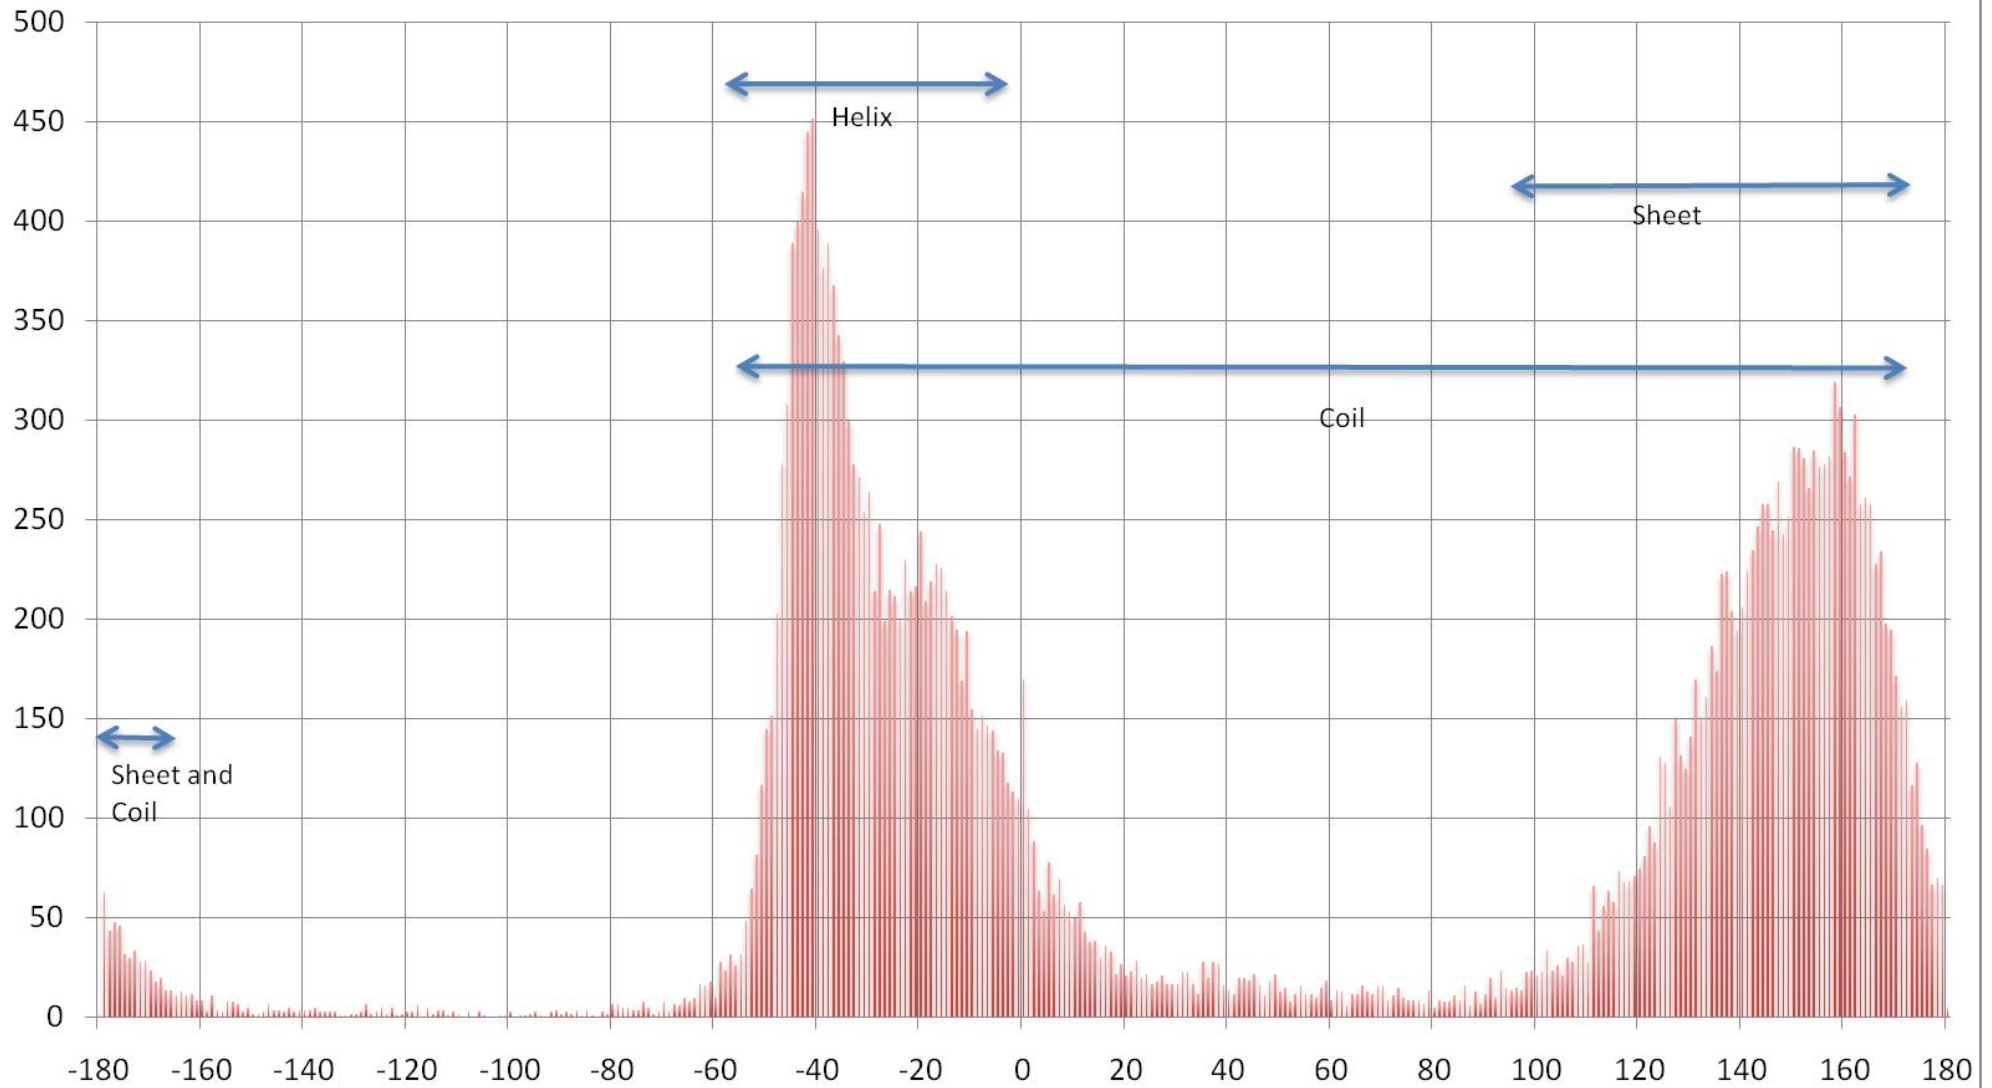

# Threonine

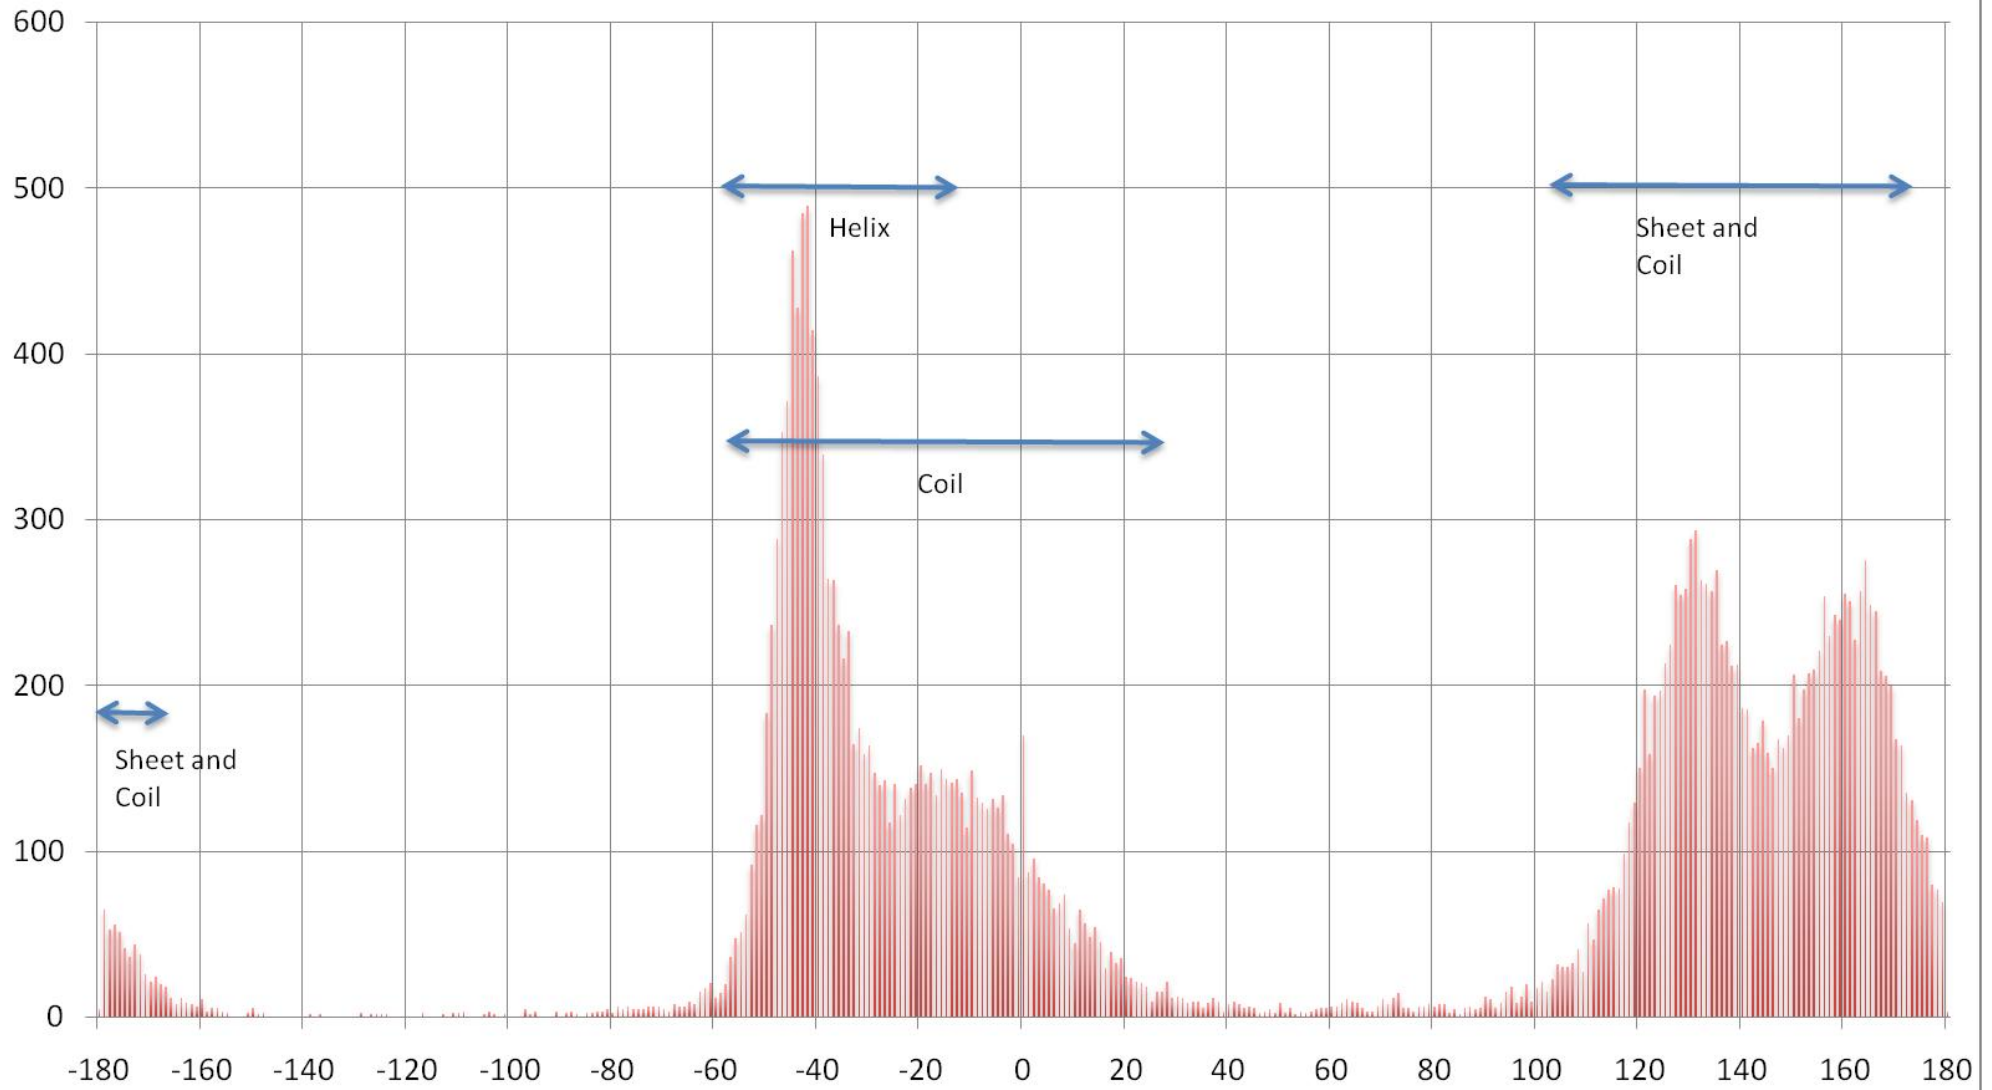



# Valine

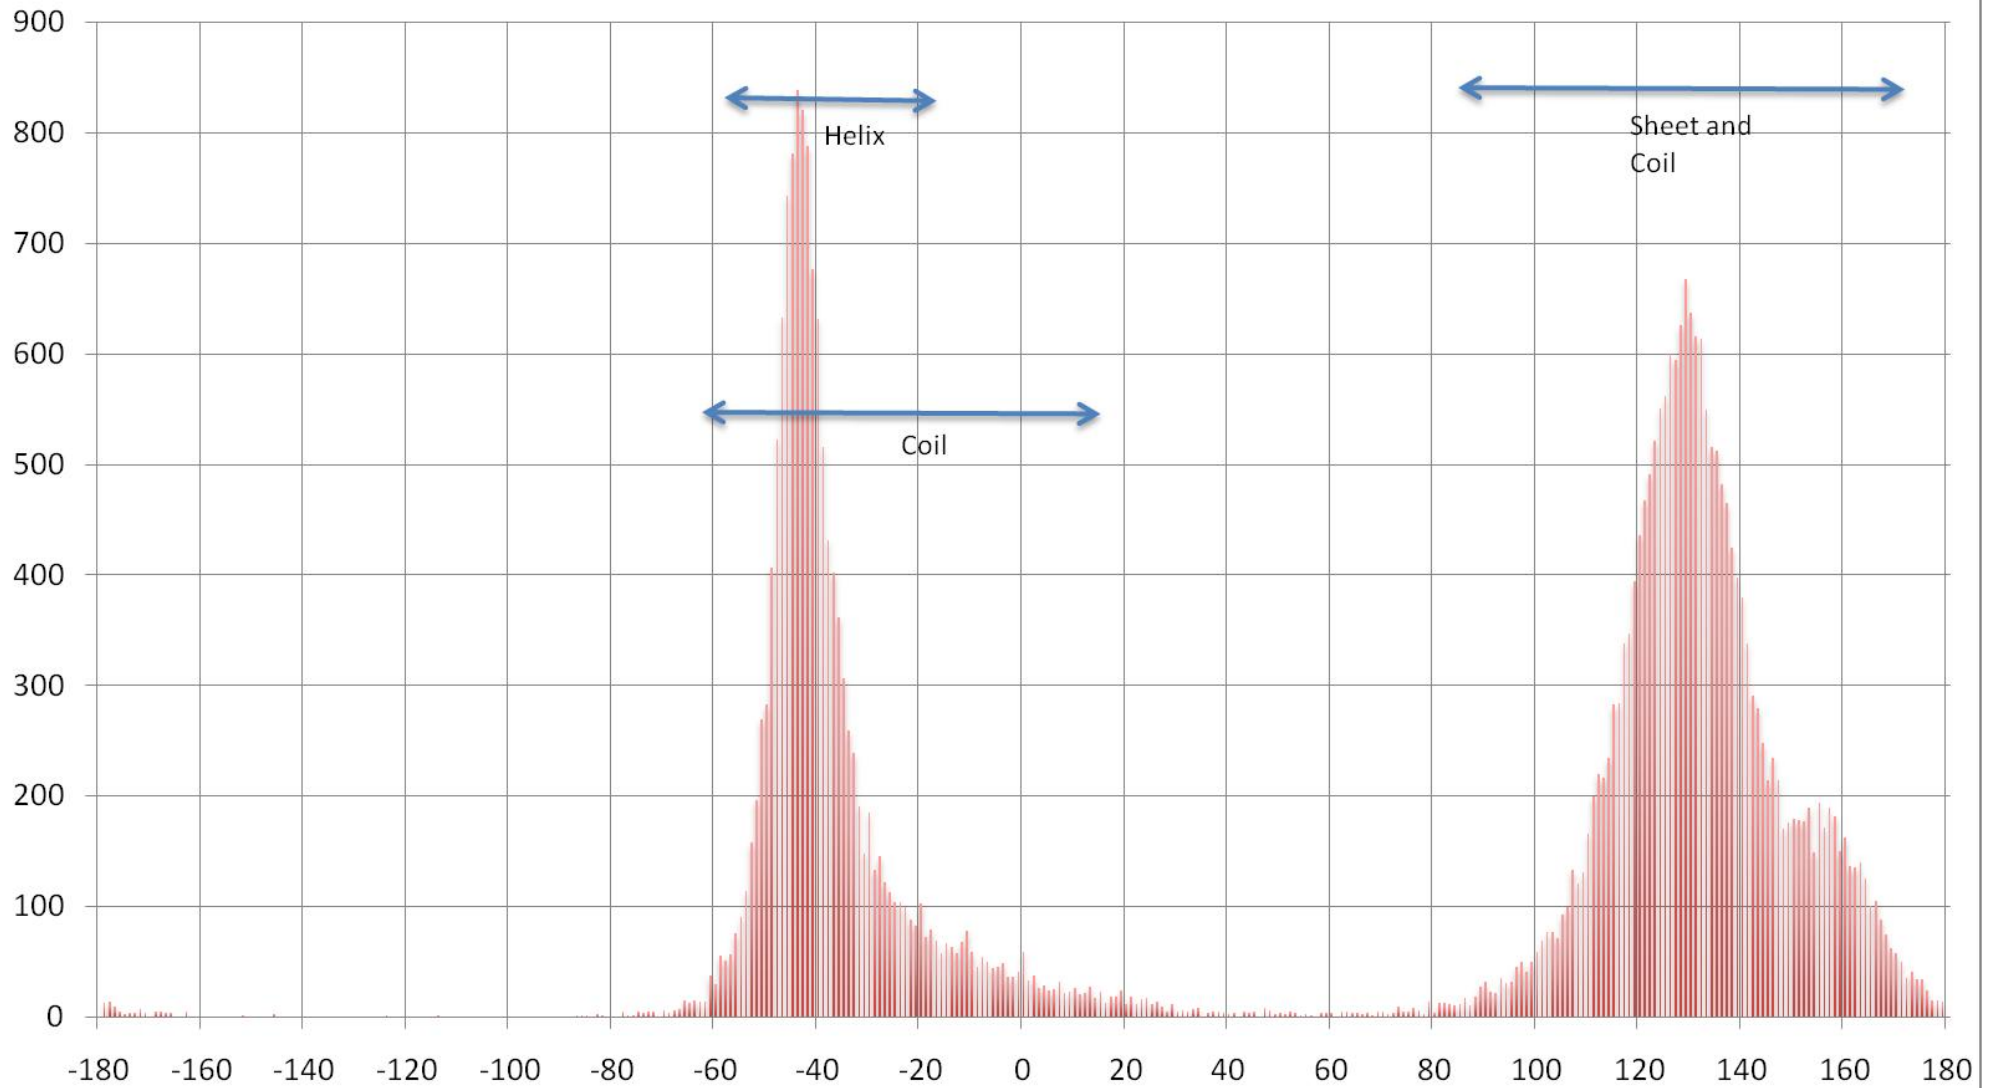

# Tryptophan

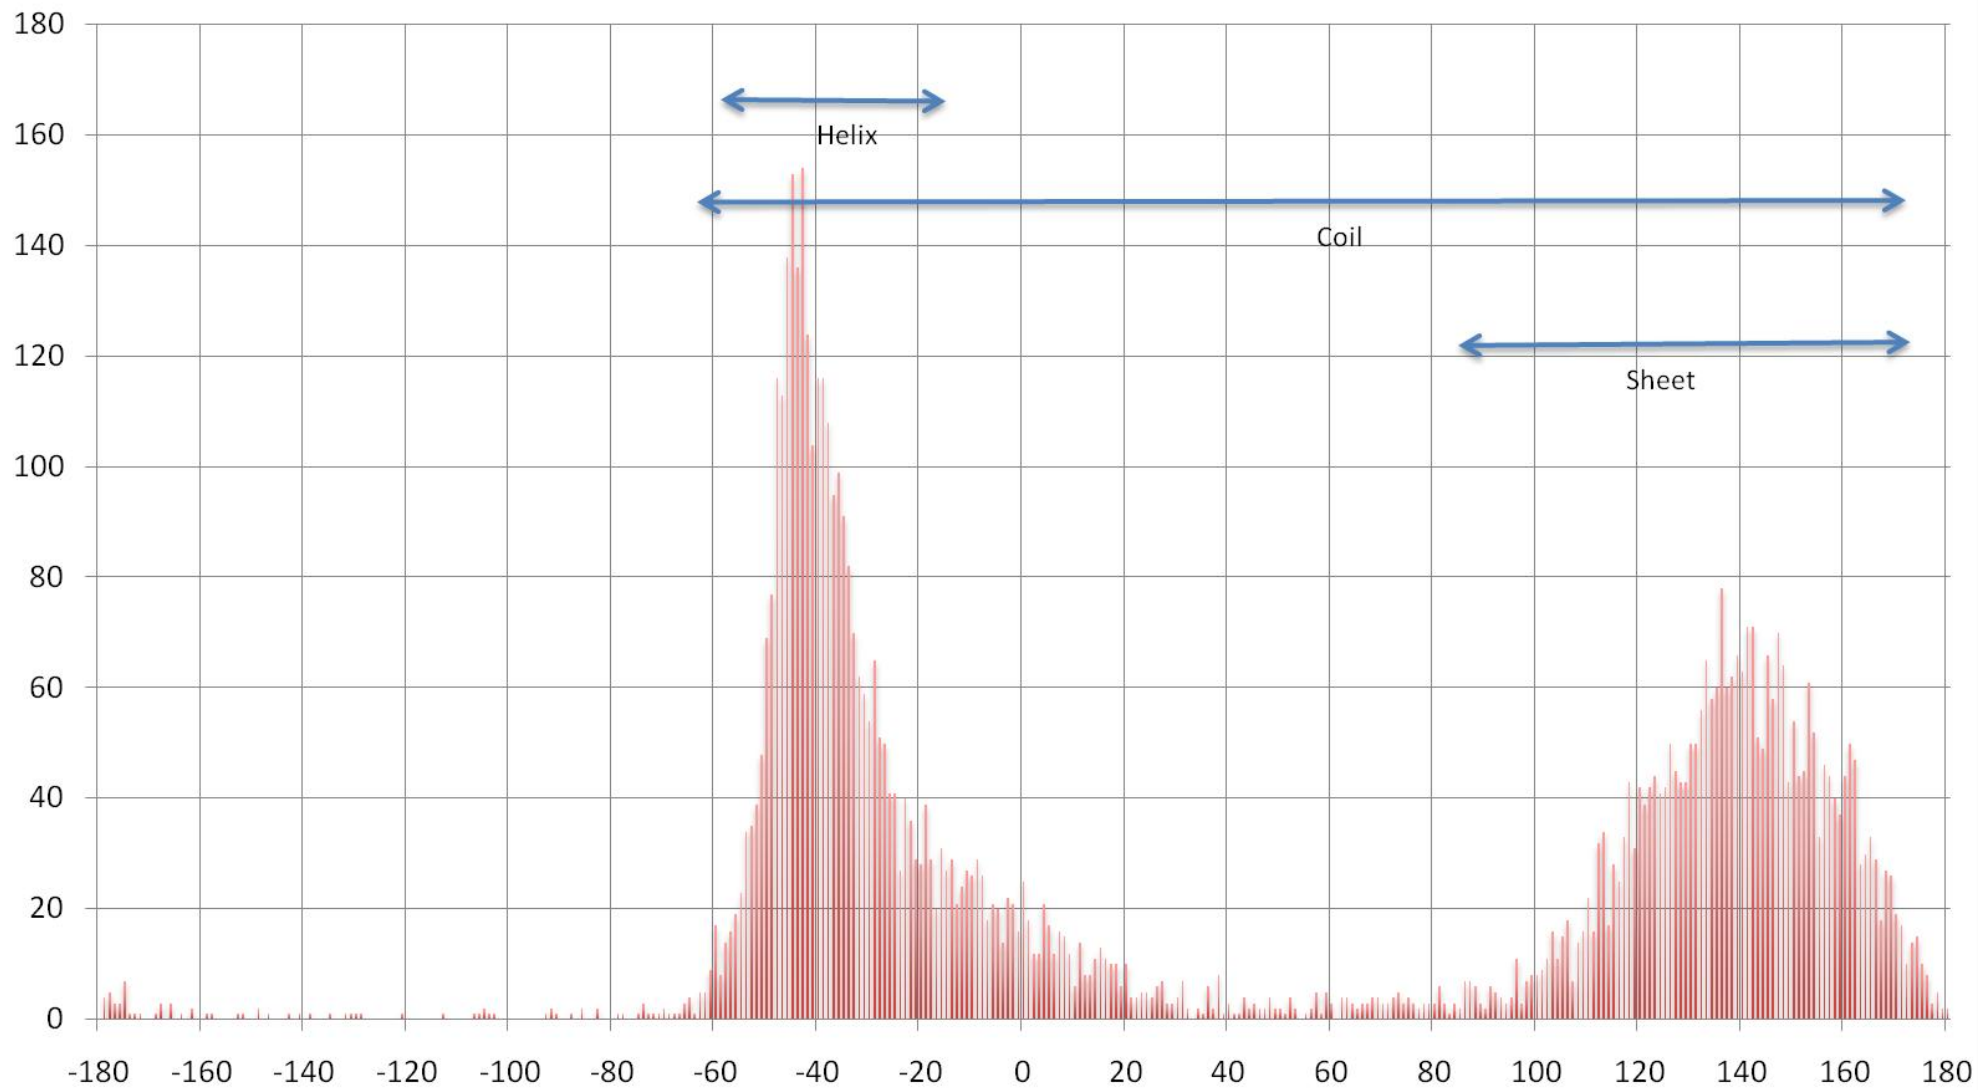

# Tyrosine

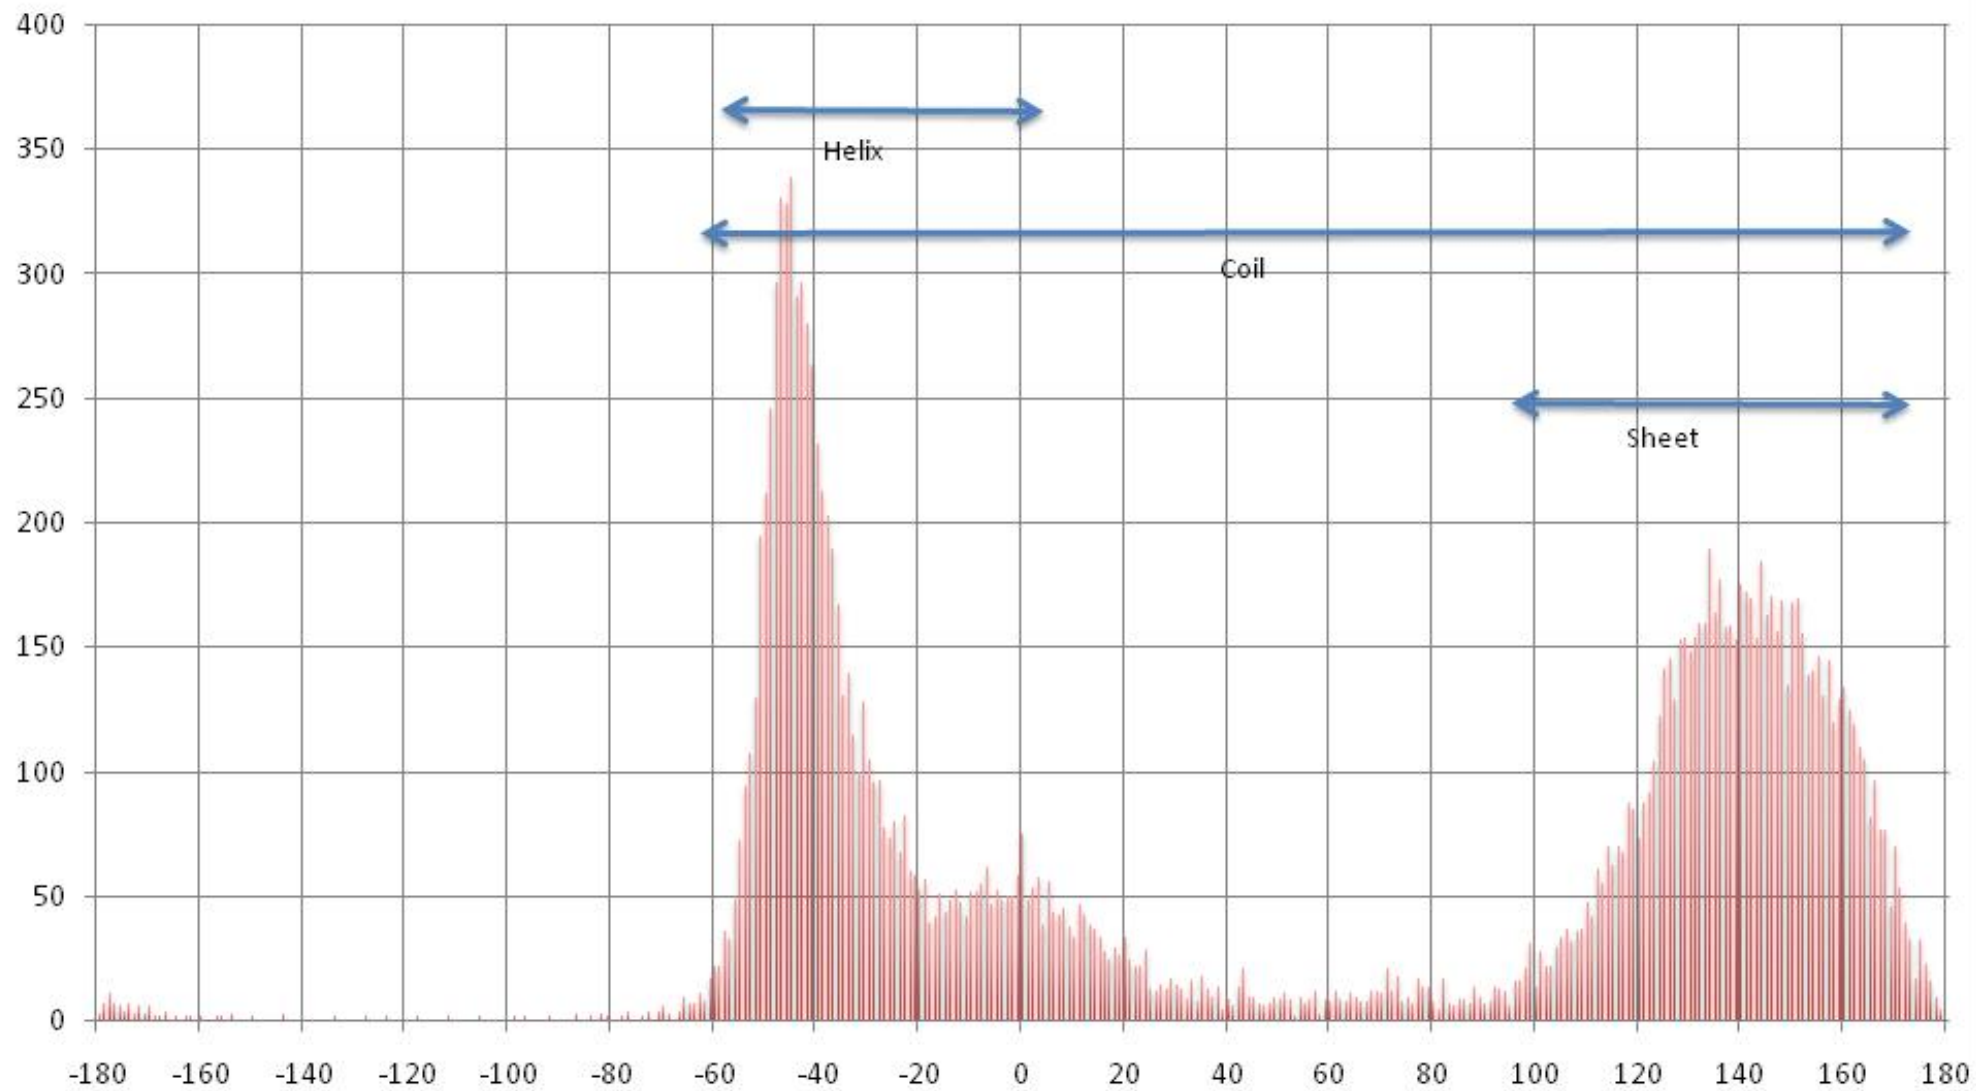

Distribution of Psi angle across 20 Amino acids

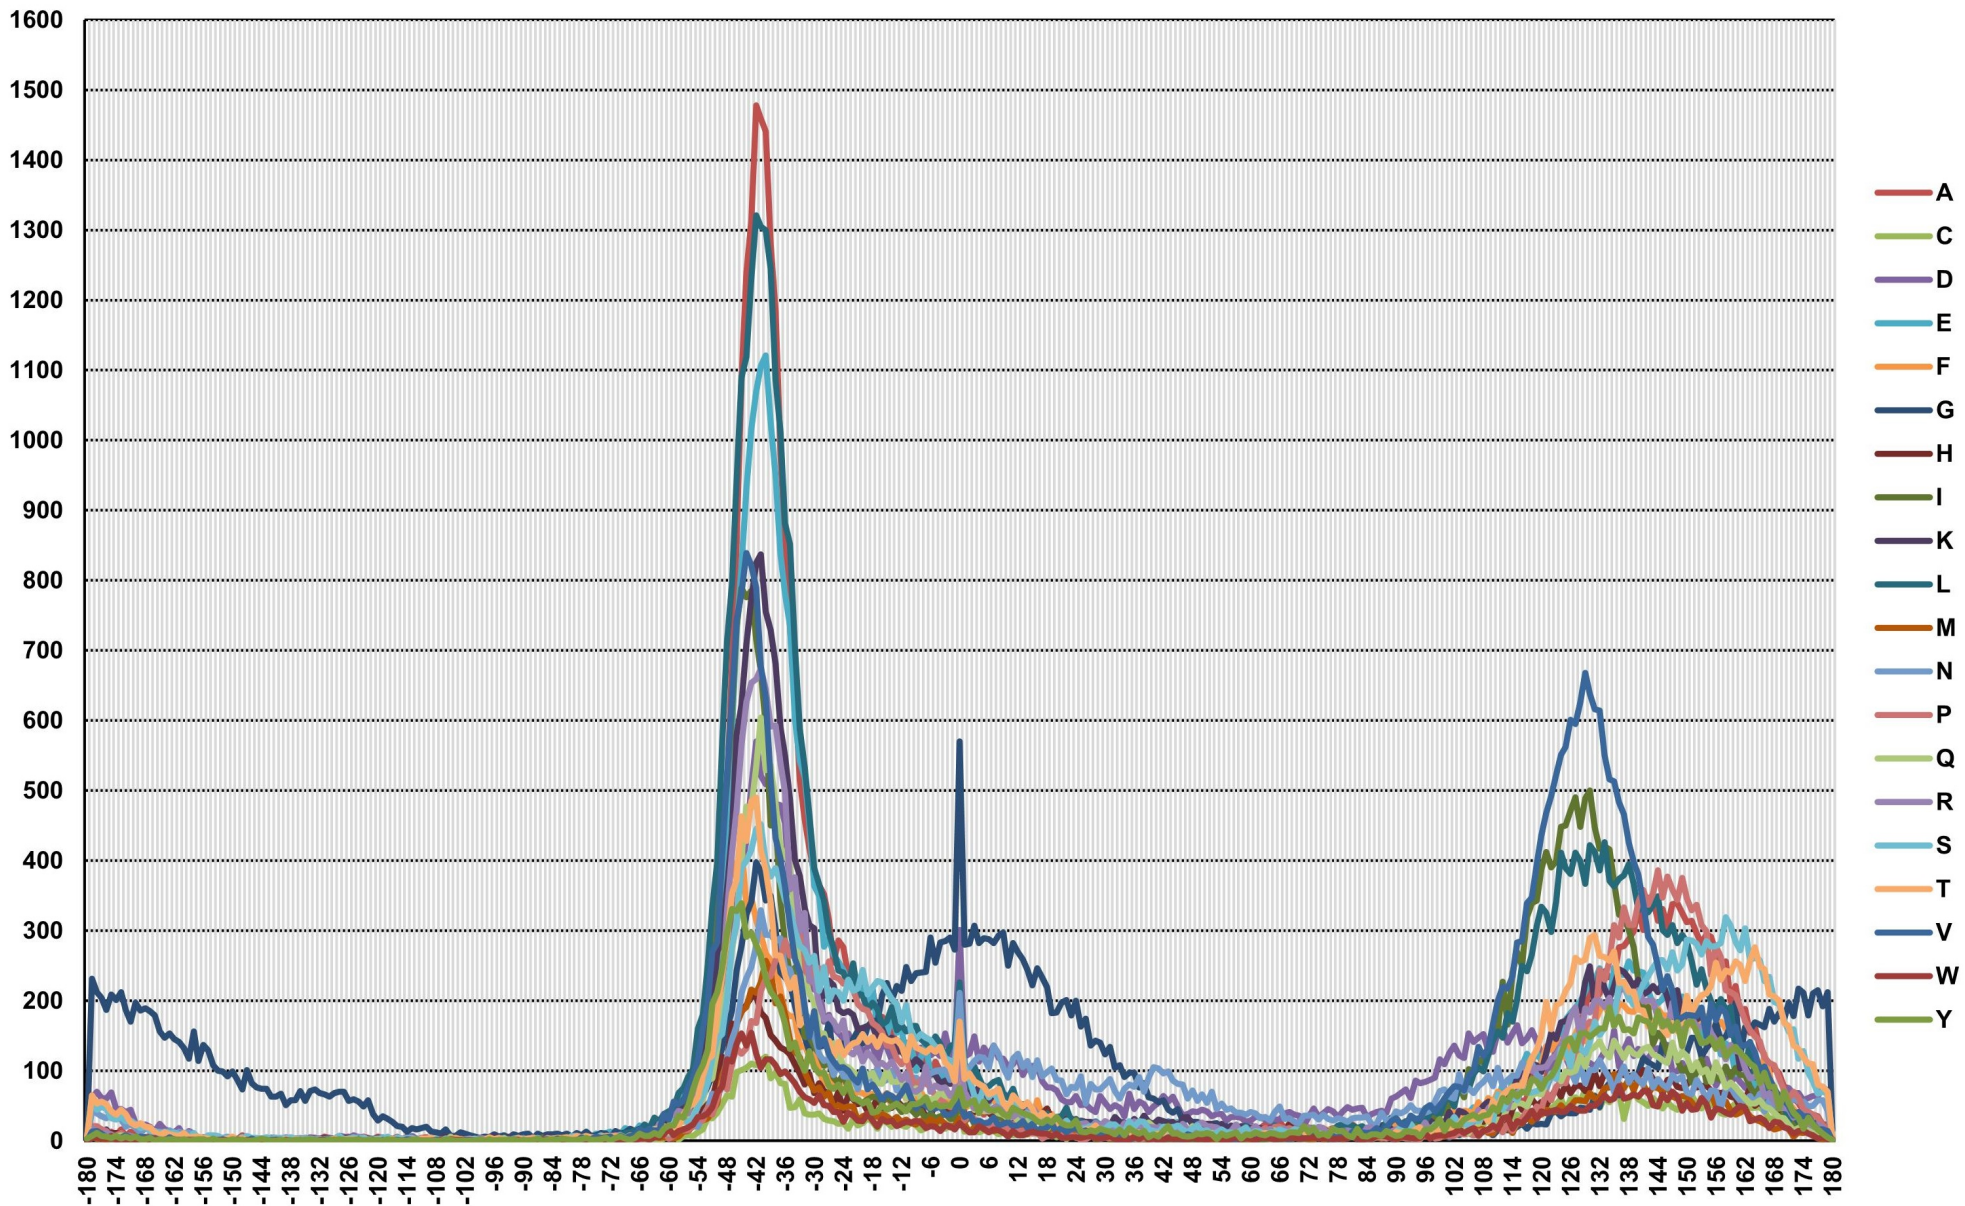

Supplement: pone.0105667.s001.pdf [file pone.0105667.s001.pdf]
